# Supplementary material for: Amino Acid-Coupled Bromophenols and a Sulfated Dimethylsulfonium Lanosol from the Red Alga Vertebrata lanosa
Source: MDPI journal article supplement (doi:10.3390/md20070420), 2022-06-27

## Supplementary Materials

# Amino Acid Coupled Bromophenols and a Sulfated Dimethylsulfonium Lanosol from the Red Alga *Vertebrata lanosa*

Joshua Jacobtorweihen<sup>1</sup>, Marthe Schmitt<sup>1,2</sup> and Verena Spiegler<sup>1,\*</sup>

<sup>1</sup> Institute for Pharmaceutical Biology and Phytochemistry, University of Münster, Corrensstraße 48, 48149 Münster, Germany; E-mail: j.jacobtorweihen@uni-muenster.de

<sup>2</sup> SIGMA Clermont, 20 Avenue Blaise Pascal, TSA 62006, 63178 AUBIERE CEDEX, France; E-Mail : marthe.schmitt@sigma-clermont.fr

\* Correspondence: verena.spiegler@uni-muenster.de

Analytical data used for the structure elucidation of **1 – 6**, **8 – 11** and **17 – 22**.

Table S1. <sup>1</sup>H- and <sup>13</sup>C-NMR data of **20 – 23**.

Figure S1. (a) – (e) 1D and 2D-NMR spectra of **7**.

Figure S2. (a) – (e) 1D and 2D-NMR spectra of **12**.

Figure S3. (a) – (e) 1D and 2D-NMR spectra of **13**.

Figure S4. (a) – (e) 1D and 2D-NMR spectra of **14**.

Figure S5. (a) – (e) 1D and 2D-NMR spectra of **15**.

Figure S6. (a) – (e) 1D and 2D-NMR spectra of **16**.

Figure S7. (a) – (f) 1D and 2D-NMR spectra of **23**.

Figure S8. (a) – (c) HR-ESI-MS spectra of **7**.

Figure S9. HR-(+)ESI-MS spectrum of **12**.

Figure S10. HR-(-)ESI-MS spectrum of **13**.

Figure S11. HR-(-)ESI-MS spectrum of **14**.

Figure S12. HR-(-)ESI-MS spectrum of **15**.

Figure S13. HR-(+)ESI-MS spectrum of **16**.

Figure S14. HR-(+)ESI-MS spectrum of **23**.

Figure S15. <sup>1</sup>H-NMR spectrum of **1** (methanol-*d*<sub>4</sub>, 289 K, 600 MHz).

Figure S16. <sup>1</sup>H-NMR spectrum of **2** (methanol-*d*<sub>4</sub>, 289 K, 600 MHz).

Figure S17. <sup>1</sup>H-NMR spectrum of **3** (acetone-*d*<sub>6</sub>, 289 K, 600 MHz).

Figure S18. <sup>1</sup>H-NMR spectrum of **4** (water-*d*<sub>2</sub>, 289 K, 400 MHz).

Figure S19. <sup>1</sup>H-NMR spectrum of **5** (acetone-*d*<sub>6</sub>, 289 K, 600 MHz).

Figure S20. <sup>1</sup>H-NMR spectrum of **6** (acetone-*d*<sub>6</sub>, 289 K, 600 MHz).

Figure S21.  $^1\text{H}$ -NMR spectrum of **8** (methanol- $d_4$ , 289 K, 600 MHz).

Figure S22.  $^1\text{H}$ -NMR spectrum of **9** (methanol- $d_4$ , 289 K, 600 MHz).

Figure S23.  $^1\text{H}$ -NMR spectrum of **10** (water- $d_2$ , 289 K, 600 MHz).

Figure S24.  $^1\text{H}$ -NMR spectrum of **11** (water- $d_2$ , 289 K, 600 MHz).

Figure S25.  $^1\text{H}$ -NMR spectrum of **17** (water- $d_2$ , 289 K, 600 MHz).

Figure S26.  $^1\text{H}$ -NMR spectrum of **18** (water- $d_2$ , 289 K, 600 MHz).

Figure S27.  $^1\text{H}$ -NMR spectrum of **19** (water- $d_2$ , 289 K, 600 MHz).

Figure S28.  $^1\text{H}$ -NMR spectrum of **20** (methanol- $d_4$ , 289 K, 600 MHz).

Figure S29.  $^1\text{H}$ -NMR spectrum of **21** (methanol- $d_4$ , 289 K, 600 MHz).

Figure S30.  $^1\text{H}$ -NMR spectrum of **22** (chloroform- $d_1$ , 289 K, 600 MHz).

**Analytical data used for the structure elucidation of 1 – 6, 8 – 11 and 17 – 22. IUPAC names are given in brackets.**

**Lanosol (3,4-dibromo-5-(hydroxymethyl)benzene-1,2-diol) (1):** grey brown amorphous solid; UV (MeCN, H<sub>2</sub>O)  $\lambda_{\text{max}}$  236, 292 nm;  $^1\text{H}$  NMR (CD<sub>3</sub>OD, 600 MHz)  $\delta$  7.01 (1H, s, H-6), 4.55 (2H, s, H-7);  $^{13}\text{C}$  NMR (CD<sub>3</sub>OD, 151 MHz)  $\delta$  146.44 (C-5), 144.77 (C-4), 134.27 (C-1), 114.89 (C-6), 114.24 (C-3), 114.05 (C-2), 65.66 (C-7); HR(+)ESI-MS  $m/z$  298.8610 / 296.8643 / 294.8613 (1.9:3.4:1.4) [M + H]<sup>+</sup> (calcd. for C<sub>7</sub>H<sub>5</sub><sup>79</sup>Br<sub>2</sub>O<sub>3</sub><sup>+</sup>, 294.8600); Observed adducts and fragments: 320.8494 / 318.8455 / 316.8484 (23:36:14) [M + Na]<sup>+</sup>, 315.8939 / 313.8897 / 311.8941 (1.9:3.1:1.4) [M + NH<sub>4</sub>]<sup>+</sup>, 282.8646 / 280.8668 / 278.8692 (48:100:54) [M – OH]<sup>+</sup>.

**Lanosol methyl ether (3,4-dibromo-5-(methoxymethyl)benzene-1,2-diol) (2):** red brown amorphous solid; UV (MeCN, H<sub>2</sub>O)  $\lambda_{\text{max}}$  212, 292 nm;  $^1\text{H}$  NMR (CD<sub>3</sub>OD, 600 MHz)  $\delta$  6.93 (1H, s, H-6), 4.43 (2H, s, H-7), 3.40 (3H, s, H-8);  $^{13}\text{C}$  NMR (CD<sub>3</sub>OD, 151 MHz)  $\delta$  146.34 (C-5), 145.33 (C-4), 131.04 (C-1), 115.86 (C-6), 115.27 (C-2), 114.35 (C-3), 75.95 (C-7), 58.50 (C-8); HR(+)ESI-MS  $m/z$  312.8741 / 310.8740 / 308.8765 (13:26:13) [M + H]<sup>+</sup> (calcd. for C<sub>8</sub>H<sub>7</sub><sup>79</sup>Br<sub>2</sub>O<sub>3</sub><sup>+</sup>, 308.8756); Observed adducts and fragments: 646.7428 / 644.7415 / 642.7290 / 640.7248 / 638.7303 (4.3:5.4:5.4:2.0:0.8) [2M + Na]<sup>+</sup>, 334.8644 / 332.8606 / 330.8587 (47:55:22)\* [M + Na]<sup>+</sup>, 329.9094 / 327.9044 / 325.8998 (5.5:5.3:2.6) [M + NH<sub>4</sub>]<sup>+</sup>, 282.8611 / 280.8628 / 278.8652 (51:100:51) [M – OCH<sub>3</sub>]<sup>+</sup>.

**2,3-Dibromo-4,5-dihydroxyphenylacetic acid methyl ester (methyl 2-(2,3-dibromo-4,5-dihydroxyphenyl)acetate) (3):** brown amorphous solid; UV (MeCN, H<sub>2</sub>O)  $\lambda_{\text{max}}$  208, 292 nm;  $^1\text{H}$  NMR (acetone- $d_6$ , 600 MHz)  $\delta$  6.96 (1H, s, H-6), 3.76 (2H, s, H-7), 3.64 (3H, s, H-9);  $^{13}\text{C}$  NMR (acetone- $d_6$ , 151 MHz)  $\delta$  171.32 (C-8), 145.51 (C-5), 144.52 (C-4), 128.14 (C-1), 118.13 (C-2), 117.30 (C-6), 113.74 (C-3), 52.12 (C-9), 42.84 (C-7); HR(+)ESI-MS  $m/z$  342.8856 / 340.8873 / 338.8891 (48:96:49) [M + H]<sup>+</sup> (calcd. for C<sub>9</sub>H<sub>9</sub><sup>79</sup>Br<sub>2</sub>O<sub>4</sub><sup>+</sup>, 338.8892); Observed adducts and fragments: 706.7439 / 704.7442 / 702.7451 / 700.7448 / 698.7417 (4.1:18:29:25:11) [2M + Na]<sup>+</sup>, 684.7643 / 682.7644 / 680.7641 / 678.7658 / 676.7760 (0.6:2.4:3.5:2.4:0.6) [2M + H]<sup>+</sup>, 364.8680 / 362.8690 / 360.8691 (46:100:59) [M + Na]<sup>+</sup>, 359.9076 / 357.9127 / 355.9129 (11:21:12) [M + NH<sub>4</sub>]<sup>+</sup>, 310.8596 / 308.5990 / 306.8595 (1.3:2.3:1.1) [M – OCH<sub>3</sub>]<sup>+</sup>, 298.8591 / 296.8607 / 294.9608 (2.3:4.9:2.7) [M – C<sub>2</sub>H<sub>4</sub>O]<sup>+</sup>, 282.8635 / 280.8658 / 278.8679 (14:27:14) [C<sub>7</sub>H<sub>5</sub>Br<sub>2</sub>O<sub>2</sub>]<sup>+</sup>.

**4,7-Disulfolanosol (2,3-dibromo-5-hydroxy-4-(sulfooxy)benzyl hydrogen sulfate) (4):** off white amorphous solid; UV (MeCN, H<sub>2</sub>O)  $\lambda_{\text{max}}$  208, 290 nm; <sup>1</sup>H NMR (D<sub>2</sub>O, 400 MHz)  $\delta$  7.24 – 7.22 (1H, m, H-6), 5.14 (2H, dd,  $J$  = 2.1, 1.0 Hz, H-7); <sup>13</sup>C NMR (D<sub>2</sub>O, 101 MHz)  $\delta$  149.39 (C-5), 138.37 (C-4), 134.99 (C-1), 122.58 (C-3), 117.82 (C-6), 115.54 (C-2), 70.66 (C-7); HR(+)ESI-MS  $m/z$  477.8195 / 475.8196 / 473.8211 (42/75/37) [M + NH<sub>4</sub>]<sup>+</sup> (calcd. for C<sub>7</sub>H<sub>10</sub><sup>79</sup>Br<sub>2</sub>NO<sub>9</sub>S<sub>2</sub><sup>+</sup>, 473.8158); Observed adducts and fragments: 499.7839 / 497.7911 / 495.8012 [M + Na + NH<sub>4</sub>]<sup>+</sup>, 494.8432 / 492.8413 / 490.8360 [M + 2NH<sub>4</sub>]<sup>+</sup>, 419.8363 / 417.8416 / 415.8521, 282.8641 / 280.8658 / 278.8682 [C<sub>7</sub>H<sub>5</sub>Br<sub>2</sub>O<sub>2</sub>]<sup>+</sup>.

**7,7'-Bis-lanosol ether (5,5'-(oxybis(methylene))bis(3,4-dibromobenzene-1,2-diol)) (5):** dark brown amorphous solid; UV (MeCN, H<sub>2</sub>O)  $\lambda_{\text{max}}$  212, 292 nm; <sup>1</sup>H NMR (acetone-*d*<sub>6</sub>, 600 MHz)  $\delta$  7.35 (1H, s, H-6 / H-6'), 4.59 (3H, s, H-7 / H-7'); <sup>13</sup>C NMR (acetone-*d*<sub>6</sub>, 151 MHz)  $\delta$  146.09 (C-5 / C-5'), 145.07 (C-4 / C-4'), 131.06 (C-1 / C-1'), 115.61 (C-6 / C-6'), 114.04 (C-2 / C-2'), 113.38 (C-3 / C-3'), 73.21 (C-7 / C-7'); HR(+)ESI-MS  $m/z$  580.7167 / 578.7314 / 576.7239 / 574.7550 (0.8:1.4:1.1:0.5) [M + H]<sup>+</sup> (calcd. for C<sub>14</sub>H<sub>11</sub><sup>79</sup>Br<sub>4</sub>O<sub>5</sub><sup>+</sup>, 574.7334); Observed adducts and fragments: 1183.4340 / 1181.4486 / 1179.4500 / 1177.4648 / 1175.4793 / 1173.4813 / 1171.4851 / 1167.4857 / 1165.5287 (2.1:5.0:7.2:19:20:16:8.3:2.8:0.5) [2M + NH<sub>4</sub>]<sup>+</sup>, 599.7496 / 597.7535 / 595.7583 / 593.7587 / 591.7598 (18:65:100:71:20) [M + NH<sub>4</sub>]<sup>+</sup>, 564.7177 / 562.7170 / 560.7175 / 558.7164 / 556.7151 (5:11:13:7) [M – H<sub>2</sub>O]<sup>+</sup>, 299.8891 / 297.8900 / 295.8935 (10:20:10) [C<sub>7</sub>H<sub>4</sub>Br<sub>2</sub>O<sub>2</sub> + NH<sub>4</sub>]<sup>+</sup>, 282.8626 / 280.8642 / 278.8660 (48:97:47) [C<sub>7</sub>H<sub>5</sub>Br<sub>2</sub>O<sub>2</sub>]<sup>+</sup>.

**2'-Lanosyl-3'-bromo-5',6'-dihydroxybenzyl alcohol (3,4-dibromo-5-(2-bromo-3,4-dihydroxy-6-(hydroxymethyl)benzyl)benzene-1,2-diol) (6):** grey brown amorphous solid; UV (MeCN, H<sub>2</sub>O)  $\lambda_{\text{max}}$  212, 288 nm; <sup>1</sup>H NMR (acetone-*d*<sub>6</sub>, 600 MHz)  $\delta$  7.10 (1H, s, H-6'), 6.08 (1H, s, H-6), 4.41 (2H, s, H-7'), 4.12 (2H, s, H-7); <sup>13</sup>C NMR (151 MHz, acetone-*d*<sub>6</sub>)  $\delta$  145.42 (C-5), 145.00 (C-5'), 143.51 (C-4), 142.80 (C-4'), 134.42 (C-1'), 132.37 (C-1), 128.25 (C-2'), 116.34 (C-2), 115.07 (C-6'), 114.86 (C-3'), 114.78 (C-6), 113.67 (C-3), 62.70 (C-7'), 39.20 (C-7); HR(+)ESI-MS  $m/z$  519.8480 / 517.8512 / 515.8520 / 513.2528 (16:49:52:22) [M + NH<sub>4</sub>]<sup>+</sup> (calcd. for C<sub>14</sub>H<sub>15</sub><sup>79</sup>Br<sub>3</sub>NO<sub>5</sub><sup>+</sup>, 513.8495); Observed adducts and fragments: 1021.6358 / 1019.6357 / 1017.6588 / 1015.6678 / 1013.6700 / 1011.6686 / 1009.6620 (3.7:4.0:4.4:4.6:3.5:1.6:0.7) [2M + NH<sub>4</sub>]<sup>+</sup>, 502.8427 / 500.8420 / 498.8421 / 496.8281 (1.5:5.5:5.9:3.0) [M + H]<sup>+</sup>, 501.8413 / 499.8417 / 497.8438 / 495.8459 (10:32:31:12) [M – H<sub>2</sub>O + NH<sub>4</sub>]<sup>+</sup>, 484.8131 / 482.8148 / 480.8154 / 478.8149 (31:95:100:41) [M – H<sub>2</sub>O]<sup>+</sup>, 403.8958 / 401.8974 / 399.9001 (17:35:18) [M – 2H<sub>2</sub>O – HBr + NH<sub>4</sub>]<sup>+</sup>, 402.8907 / 400.8912 / 398.8914 (15:22:10) [M – H<sub>2</sub>O – HBr]<sup>+</sup>, 282.8652 / 280.8677 / 278.8730 (2.4:4.2:2.1) [C<sub>7</sub>H<sub>5</sub>Br<sub>2</sub>O<sub>2</sub>]<sup>+</sup>.

**Rhodomelol (3-(2,3-dibromo-4,5-dihydroxybenzyl)-3,3a,6-trihydroxytetrahydrofuro[3,2-*b*]furan-2(3*H*)-one) (8):** red brown oil; UV (MeCN, H<sub>2</sub>O)  $\lambda_{\text{max}}$  208, 292 nm; <sup>1</sup>H NMR (CD<sub>3</sub>OD 600 MHz)  $\delta$  7.05 (1H, s, H-6), 4.60 (2H, s, H-6'a), 4.42 (1H, dd,  $J$  = 6.2, 3.7 Hz, H-6'), 4.24 (1H, dd,  $J$  = 9.8, 5.8 Hz, H-5'a), 4.10 (1H, dd,  $J$  = 9.8, 3.3 Hz, H-5'b), 3.37 (2H, d,  $J$  = 8.9 Hz, H-7a), 3.12 (1H, d,  $J$  = 6.9 Hz, H-7b); HR(+)ESI-MS  $m/z$  458.8876 / 456.8896 / 454.8923 (3.2:6.6:3.4) [M + H]<sup>+</sup> (calcd. for C<sub>13</sub>H<sub>13</sub><sup>79</sup>Br<sub>2</sub>O<sub>8</sub><sup>+</sup>, 454.8972); Observed adducts and fragments: 916.7744 / 914.7753 / 912.7756 / 910.7828 / 908.7947 (0.8:3.3:5.2:3.5:0.9) [2M + H]<sup>+</sup>, 475.9127 / 473.9167 / 471.9183 (38:78:39) [M + NH<sub>4</sub>]<sup>+</sup>; MS/MS  $m/z$  282.8638 / 280.0382 / 278.8672 (21:100:39) [C<sub>7</sub>H<sub>5</sub>Br<sub>2</sub>O<sub>2</sub>]<sup>+</sup>, 177.0378 (55) [C<sub>6</sub>H<sub>9</sub>O<sub>6</sub>]<sup>+</sup>, 141.0137 (68) [C<sub>6</sub>H<sub>5</sub>O<sub>4</sub>]<sup>+</sup>, 95.0105 (62) [C<sub>5</sub>H<sub>3</sub>O<sub>2</sub>]<sup>+</sup>.

**Methylrhodomelol (3-(2,3-dibromo-4,5-dihydroxybenzyl)-3a,6-dihydroxy-3-methoxytetrahydrofuro[3,2-*b*]furan-2(3*H*)-one) (9):** orange oil; UV (MeCN, H<sub>2</sub>O)  $\lambda_{\text{max}}$  212, 290 nm; <sup>1</sup>H NMR (CD<sub>3</sub>OD, 600 MHz)  $\delta$  6.94 (1H, s, H-6), 4.63 (1H, s, H-6'a), 4.42 (1H, dd,  $J$  = 5.9, 3.4 Hz, H-6'), 4.28 (1H, dd,  $J$  = 9.8, 5.7 Hz, H-5'a), 4.14 (1H, dd,  $J$  = 9.8, 3.3 Hz, H-5'b), 3.60 (3H, s, H-7'), 3.37 – 3.34 (2H, m, H-7); <sup>13</sup>C NMR (CD<sub>3</sub>OD, 151 MHz)  $\delta$  173.26 (C-2'), 145.78 (C-5), 144.90 (C-4), 128.06 (C-1), 118.70 (C-6), 117.92 (C-2), 113.66 (C-3), 110.52 (C-3'a), 88.91 (C-6'a), 83.96 (C-3'), 76.88 (C-5'), 74.79 (C-6'), 54.63 (C-7'), 38.94 (C-7); HR(+)ESI-MS  $m/z$  472.9109 / 470.9133 / 468.9168 (8.2:17:8.5) [M + H]<sup>+</sup> (calcd. for C<sub>14</sub>H<sub>15</sub><sup>79</sup>Br<sub>2</sub>O<sub>8</sub><sup>+</sup>, 468.9128); Observed adducts and fragments: 966.8024 / 964.8024 / 962.8032 / 960.8079 / 958.8172 (6.6:22:32:23:8.3) [2M + Na]<sup>+</sup>, 961.8146 / 959.8382 / 957.8479 / 955.8487 / 953.8484 (8.6:7.6:8.6:5.6:1.6; isotopic pattern is distorted due to

$^{13}\text{C}$  isotopes of the sodium adduct)  $[2\text{M} + \text{NH}_4]^+$ , 944.8212 / 942.8191 / 940.8205 / 938.8234 / 936.8241 (1.6:5.4:7:7:5.2:1.5)  $[2\text{M} + \text{H}]^+$ , 494.8938 / 492.8971 / 490.9184 (9.1:18:14)  $[\text{M} + \text{Na}]^+$ , 489.9388 / 487.9405 / 485.9428 (51:100:50)  $[\text{M} + \text{NH}_4]^+$ , 454.9014 / 452.9041 / 450.9050 (2.5:4.8:2.4)  $[\text{M} - \text{H}_2\text{O}]^+$ , 282.8622 / 280.8640 / 278.8652 (0.9:1.8:0.9)  $[\text{C}_7\text{H}_5\text{Br}_2\text{O}_2]^+$ , 191.0561 (38)  $[\text{C}_7\text{H}_{11}\text{O}_6]^+$ , 173.0458 (9.0)  $[\text{C}_7\text{H}_9\text{O}_5]^+$ , 155.0343 (2.8)  $[\text{C}_7\text{H}_7\text{O}_4]^+$ , 143.0338 (7.9)  $[\text{C}_6\text{H}_7\text{O}_4]^+$ , 117.0194 (5.3).

**L-Phenylalanine (10):** orange amorphous solid;  $[\alpha]^{20}_{\text{D}} -23.7$  (c 0.2,  $\text{H}_2\text{O}$ ); UV (MeCN,  $\text{H}_2\text{O}$ )  $\lambda_{\text{max}}$  200, 260 nm;  $^1\text{H}$  NMR ( $\text{D}_2\text{O}$ , 600 MHz)  $\delta$  7.46 – 7.41 (2H, m, H-3, H-5), 7.41 – 7.37 (1H, m, H-4), 7.36 – 7.32 (2H, m, H-2, H-6), 4.30 (1H, dd,  $J = 7.8, 5.4$  Hz, H-2), 3.36 (1H, dd,  $J = 14.7, 5.6$  Hz, H- $\beta\text{a}$ ), 3.22 (1H, dd,  $J = 14.7, 7.8$  Hz, H- $\beta\text{b}$ );  $^{13}\text{C}$  NMR ( $\text{D}_2\text{O}$ , 151 MHz)  $\delta$  172.72 (COOH), 135.08 (C-1), 130.37 (C-2, C-6), 130.17 (C-3, C-5), 128.94 (C-4), 55.36 (C- $\alpha$ ), 36.66 (C- $\beta$ ); HR(+)ESI-MS  $m/z$  166.0893 (100)  $[\text{M} + \text{H}]^+$  (calcd. for  $\text{C}_9\text{H}_{12}\text{NO}_2^+$ , 166.0893); Observed adducts and fragments: 331.1717 (1.3)  $[2\text{M} + \text{H}]^+$ , 120.0832 (89)  $[\text{M} - \text{COOH}]^+$ .

**L-Tyrosine (11):** off white amorphous solid;  $[\alpha]^{20}_{\text{D}} -31.4$  (c 0.1,  $\text{H}_2\text{O}$ ); UV (MeCN,  $\text{H}_2\text{O}$ )  $\lambda_{\text{max}}$  224, 276 nm;  $^1\text{H}$  NMR ( $\text{D}_2\text{O}$ , 600 MHz)  $\delta$  7.22 – 7.17 (2H, m, H-2, H-6), 6.91 – 6.87 (2H, m, H-3, H-5), 4.14 (1H, dd,  $J = 7.7, 5.4$  Hz,  $\alpha\text{-H}$ ), 3.25 (1H, dd,  $J = 14.7, 5.4$  Hz, H- $\beta\text{a}$ ), 3.11 (1H, dd,  $J = 14.7, 7.7$  Hz, H- $\beta\text{b}$ );  $^{13}\text{C}$  NMR ( $\text{D}_2\text{O}$ , 151 MHz)  $\delta$  173.47 (COOH), 156.02 (C-4), 131.75 (C-2, C-6), 127.10 (C-1), 116.82 (C-3, C-5), 55.98 (C- $\alpha$ ), 36.03 (C- $\beta$ ); HR(+)ESI-MS  $m/z$  182.0837 (100)  $[\text{M} + \text{H}]^+$  (calcd. for  $\text{C}_9\text{H}_{12}\text{NO}_3^+$ , 182.0837); Observed adducts and fragments: 165.0558 (73)  $[\text{M} - \text{NH}_3]^+$ , 147.0446 (4.3)  $[\text{M} - \text{NH}_3 - \text{H}_2\text{O}]^+$ , 136.0765 (39), 123.0452 (4.9).

**Porphyra-334 (((5S,E)-3-((1-carboxy-2-hydroxypropyl)iminio)-5-hydroxy-5-(hydroxymethyl)-2-methoxycyclohex-1-en-1-yl)glycinate) (17):** orange oil; UV (MeCN,  $\text{H}_2\text{O}$ )  $\lambda_{\text{max}}$  336 nm;  $^1\text{H}$  NMR ( $\text{D}_2\text{O}$ , 600 MHz)  $\delta$  4.30 (1H, ddd,  $J = 6.5, 4.5, 2.9$  Hz, H-2'), 4.07 (1H, dd,  $J = 4.6, 2.5$  Hz, H-1'), 4.04 (2H, q,  $J = 3.0$  Hz, H-9), 3.69 (3H, t,  $J = 2.4$  Hz, H-8), 3.57 (2H, t,  $J = 2.6$  Hz, H-7), 2.91 (1H, d,  $J = 2.3$  Hz, H-6a), 2.84 – 2.80 (1H, m, H-4a), 2.77 (1H, ddt,  $J = 9.6, 3.9, 1.9$  Hz, H-4b), 2.75 – 2.72 (1H, m, H-6b), 1.25 (3H, dt,  $J = 6.8, 2.3$  Hz, H-3');  $^{13}\text{C}$  NMR ( $\text{D}_2\text{O}$ , 151 MHz)  $\delta$  175.40 (C-4'), 174.91 (C-10), 160.63 (C-3), 159.06 (C-1), 125.74 (C-2), 71.15 (C-5), 68.28 (C-2'), 64.50 (C-1'), 59.47 (C-8), 46.74 (C-9), 33.37 (C-6), 32.93 (C-4), 19.49 (C-3'); HR(+)ESI-MS  $m/z$  347.1452 (100)  $[\text{M} + \text{H}]^+$  (calcd. for  $\text{C}_{14}\text{H}_{23}\text{N}_2\text{O}_8^+$ , 347.1449).

**Aplysiapalythine A (((5S,E)-5-hydroxy-5-(hydroxymethyl)-3-((2-hydroxypropyl)iminio)-2-methoxycyclohex-1-en-1-yl)glycinate) (18):** yellow oil; UV (MeCN,  $\text{H}_2\text{O}$ )  $\lambda_{\text{max}}$  332 nm;  $^1\text{H}$  NMR ( $\text{D}_2\text{O}$ , 600 MHz)  $\delta$  4.03 (2H, t,  $J = 1.4$  Hz, H-9), 4.02 – 3.99 (1H, m, H-2'), 3.63 (3H, d,  $J = 1.5$  Hz, H-8), 3.59 (2H, t,  $J = 1.5$  Hz, H-7), 3.47 (1H, d,  $J = 1.4$  Hz, H-1'a), 3.45 (1H, d,  $J = 1.4$  Hz, H-1'b), 2.89 (2H, s, H-6), 2.77 (1H, d,  $J = 1.3$  Hz, H-4a), 2.75 (1H, d,  $J = 1.3$  Hz, H-4b), 1.23 (3H, dd,  $J = 6.4, 1.5$  Hz, H-3');  $^{13}\text{C}$  NMR ( $\text{D}_2\text{O}$ , 151 MHz)  $\delta$  177.60 (C-10), 162.72 (C-1), 162.17 (C-3), 127.87 (C-2), 73.62 (C-5), 70.02 (C-7), 69.22 (C-2'), 61.58 (C-8), 51.45 (C-1'), 49.06 (C-9), 35.63 (C-4), 35.32 (C-6), 21.91 (C-3'); HR(+)ESI-MS  $m/z$  303.1558 (100)  $[\text{M} + \text{H}]^+$  (calcd. for  $\text{C}_{13}\text{H}_{23}\text{N}_2\text{O}_6^+$ , 303.1551); Observed adducts and fragments: 341.1116 (4.6)  $[\text{M} + \text{K}]^+$ , 325.1381 (5.6)  $[\text{M} + \text{Na}]^+$ , 275.1614 (8.2), 245.1498 (6.3)  $[\text{M} - \text{CH}_2\text{CO}_2]^+$ .

**Palythine ((S)-(5-hydroxy-5-(hydroxymethyl)-3-imino-2-methoxycyclohex-1-en-1-yl)glycine) (19):** orange oil; UV (MeCN,  $\text{H}_2\text{O}$ )  $\lambda_{\text{max}}$  320 nm;  $^1\text{H}$  NMR ( $\text{D}_2\text{O}$ , 600 MHz)  $\delta$  4.03 (2H, dt,  $J = 3.3, 1.6$  Hz, H-9), 3.64 (3H, dd,  $J = 3.8, 1.9$  Hz, H-8), 3.56 (1H, dd,  $J = 4.2, 2.0$  Hz, H-7), 2.95 (1H, dd,  $J = 17.2, 2.9$  Hz, H-6a), 2.83 (1H, dd,  $J = 17.6, 2.7$  Hz, H-4a), 2.78 – 2.72 (1H, m, H-4b), 2.68 (1H, ddd,  $J = 17.0, 3.6, 1.8$  Hz, H-6b);  $^{13}\text{C}$  NMR ( $\text{D}_2\text{O}$ , 151 MHz)  $\delta$  174.90 (C-10)\*, 161.90 (C-1), 160.29 (C-3), 124.71 (C-2), 71.39 (C-5), 67.49 (C-7), 59.04 (C-8), 46.76 (C-9), 35.87 (C-6), 33.49 (C-4);  $^{13}\text{C}$  NMR ( $\text{D}_2\text{O}$ , 151 MHz)  $\delta$  174.90 (C-9; assigned via HMBC), 161.90 (C-3), 160.29 (C-1), 124.71 (C-2), 71.39 (C-5), 67.49 (C-7), 59.04 (C-10), 46.76 (C-8), 35.87 (C-4), 33.49 (C-6); HR(+)ESI-MS  $m/z$  245.1124 (100)  $[\text{M} + \text{H}]^+$  (calcd. for  $\text{C}_{10}\text{H}_{17}\text{N}_2\text{O}_5^+$ , 245.1132); Observed adducts and fragments: 267.0938 (12)  $[\text{M} + \text{Na}]^+$ , 217.1166 (5.5), 187.1062 (11).

**(4Z,7Z,10Z,13Z)-Hexadecatetraenoic acid 3'-β-D-galactopyranosyl-1-glycerol ester (2-hydroxy-3-(((1R,2R,3S,4S,5R)-2,3,4-trihydroxy-5-(hydroxymethyl)cyclohexyl)oxy)propyl (4Z,7Z,10Z,13Z)-hexadeca-4,7,10,13-tetraenoate) (20):** dark brown amorphous solid; UV (MeCN, H<sub>2</sub>O) λ<sub>max</sub> 230 nm; for NMR data see Table S1.; HR(+)ESI-MS *m/z* 485.2745 (32) [M + H]<sup>+</sup> (calcd. for C<sub>25</sub>H<sub>41</sub>O<sub>9</sub><sup>+</sup>, 485.2745); Observed adducts and fragments: 991.5261 (13) [2M + Na]<sup>+</sup>, 986.5717 (29) [2M + NH<sub>4</sub>]<sup>+</sup>, 969.5452 (8) [2M + H]<sup>+</sup>, 507.9814 (10) [M + Na]<sup>+</sup>, 502.3021 (100) [M + NH<sub>4</sub>]<sup>+</sup>, 467.2643 (36) [M – H<sub>2</sub>O]<sup>+</sup>, 323.2220 (69) [M – Gal]<sup>+</sup>, 305.2110 (6.7) [M – Gal – H<sub>2</sub>O]<sup>+</sup>, 231.1744 (27) (fatty acid oxocarbenium ion [C<sub>16</sub>H<sub>23</sub>O]<sup>+</sup>), 213.1614 (4.3) (fatty acid carbenium ion [C<sub>16</sub>H<sub>21</sub>]<sup>+</sup>).

**(6Z,9Z,12Z,15Z)-Stearidonic acid 3'-β-D-galactopyranosyl-1-glycerol ester (2-hydroxy-3-(((3R,4S,5R,6R)-3,4,5-trihydroxy-6-(hydroxymethyl)tetrahydro-2H-pyran-2-yl)oxy)propyl (5Z,8Z,11Z,14Z)-octadeca-5,8,11,14-tetraenoate) (21):** greenish brown amorphous solid; UV (MeCN, H<sub>2</sub>O) λ<sub>max</sub> 212 nm; for NMR data see Table S1.; HR(+)ESI-MS *m/z* 513.3077 (37) [M + H]<sup>+</sup> (calcd. for C<sub>27</sub>H<sub>45</sub>O<sub>9</sub><sup>+</sup>, 513.3058); Observed adducts and fragments: 1047.5954 (9.5) [2M + Na]<sup>+</sup>, 1042.6393 (30) [2M + NH<sub>4</sub>]<sup>+</sup>, 1025.6113 (18) [2M + H]<sup>+</sup>, 535.2895 (4.8) [M + Na]<sup>+</sup>, 530.3355 (75) [M + NH<sub>4</sub>]<sup>+</sup>, 495.2984 (73) [M – H<sub>2</sub>O]<sup>+</sup>, 351.2549 (100) [M – Gal]<sup>+</sup>, 259.2069 (19) (fatty acid oxocarbenium ion, [C<sub>18</sub>H<sub>27</sub>O]<sup>+</sup>), 241.1952 (5.2) (fatty acid carbenium ion [C<sub>18</sub>H<sub>25</sub>]<sup>+</sup>).

**(5Z,8Z,11Z,14Z,17Z)-Eicosapentaenoic acid 3'-β-D-galactopyranosyl-1-glycerol ester (2-hydroxy-3-(((3R,4S,5R,6R)-3,4,5-trihydroxy-6-(hydroxymethyl)tetrahydro-2H-pyran-2-yl)oxy)propyl (5Z,8Z,11Z,14Z,17Z)-icosa-5,8,11,14,17-pentaenoate) (22):** yellowish brown amorphous solid; [α]<sub>D</sub><sup>20</sup> -5.1 (c 0.7, MeOH); UV (MeCN, H<sub>2</sub>O) λ<sub>max</sub> 212 nm; for NMR data see Table S1.; HR(+)ESI-MS *m/z* 539.3242 (44) [M + H]<sup>+</sup> (calcd. for C<sub>29</sub>H<sub>47</sub>O<sub>9</sub><sup>+</sup>, 539.3215); Observed adducts and fragments: 1094.6733 (16) [2M + NH<sub>4</sub>]<sup>+</sup>, 1077.6446 (24) [2M + H]<sup>+</sup>, 556.3501 (51) [M + NH<sub>4</sub>]<sup>+</sup>, 521.3132 (94) [M – H<sub>2</sub>O]<sup>+</sup>, 377.2687 (100) [M – Gal]<sup>+</sup>, 285.2231 (21) (fatty acid oxocarbenium ion, [C<sub>20</sub>H<sub>29</sub>O]<sup>+</sup>), 267.2105 (6.6) (fatty acid carbenium ion [C<sub>20</sub>H<sub>27</sub>]<sup>+</sup>).

**Table S1.** <sup>1</sup>H (600 MHz)- and <sup>13</sup>C-NMR (151 MHz) data of **20** – **23**.

|             | <b>20</b><br>in CD <sub>3</sub> OD |                                              | <b>21</b><br>in CD <sub>3</sub> OD |                                              | <b>22</b><br>in CDCl <sub>3</sub> |                                         | <b>23</b><br>in acetone-d <sub>6</sub> |                      |
|-------------|------------------------------------|----------------------------------------------|------------------------------------|----------------------------------------------|-----------------------------------|-----------------------------------------|----------------------------------------|----------------------|
| <b>Pos.</b> | <sup>13</sup> C                    | <sup>1</sup> H                               | <sup>13</sup> C                    | <sup>1</sup> H                               | <sup>13</sup> C                   | <sup>1</sup> H                          | <sup>13</sup> C                        | <sup>1</sup> H       |
| 1           | 174.74<br>(COOR)                   | -                                            | 175.32<br>(COOR)                   | -                                            | 174.40<br>(COOR)                  | -                                       | 175.25<br>(COOR)                       | -                    |
| 2           | 34.92 (CH <sub>2</sub> )           | 2.40 (4H, m) <sup>a</sup>                    | 34.82(CH <sub>2</sub> )            | 2.38 (t, 7.5)                                | 33.70 (CH <sub>2</sub> )          | 2.35 (t, 7.8)                           | 34.34 (CH <sub>2</sub> )               | 2.39 (t, 7.4)        |
| 3           | 23.74 (CH <sub>2</sub> )           | a                                            | 25.62(CH <sub>2</sub> )            | 1.65 (dt, 15.1, 7.3)                         | 24.88 (CH <sub>2</sub> )          | 1.66 (p, 7.5)                           | 25.90 (CH <sub>2</sub> )               | 1.70 (p, 7.4)        |
| 4           | *                                  | *                                            | 30.16 (CH <sub>2</sub> )           | 1.42 (p, 7.6)                                | 25.75 (CH <sub>2</sub> )          | 2.12 – 2.07 (m)                         | 27.56 (CH <sub>2</sub> )               | 2.15 (m)             |
| 5           | *                                  | *                                            | 27.88 (CH <sub>2</sub> )           | 2.10 (4H, m) <sup>b</sup>                    | *                                 | *                                       | *                                      | *                    |
| 6           | **                                 | **                                           | 130.66 (CH)                        | *                                            | *                                 | *                                       | *                                      | *                    |
| 7           | *                                  | *                                            | *                                  | *                                            | **                                | **                                      | **                                     | **                   |
| 8           | *                                  | *                                            | **                                 | **                                           | *                                 | *                                       | *                                      | *                    |
| 9           | **                                 | **                                           | *                                  | *                                            | *                                 | *                                       | *                                      | *                    |
| 10          | *                                  | *                                            | *                                  | *                                            | **                                | **                                      | **                                     | **                   |
| 11          | *                                  | *                                            | **                                 | **                                           | *                                 | *                                       | *                                      | *                    |
| 12          | **                                 | **                                           | *                                  | *                                            | *                                 | *                                       | *                                      | *                    |
| 13          | *                                  | *                                            | *                                  | *                                            | **                                | **                                      | **                                     | **                   |
| 14          | *                                  | *                                            | **                                 | **                                           | *                                 | *                                       | *                                      | *                    |
| 15          | 21.49 (CH <sub>2</sub> )           | 2.09 (p, 7.4)                                | *                                  | *                                            | *                                 | *                                       | *                                      | *                    |
| 16          | 14.20 (CH <sub>3</sub> )           | 0.98 (t, 7.6)                                | 132.80 (CH)                        | *                                            | **                                | **                                      | **                                     | **                   |
| 17          |                                    |                                              | 21.50 (CH <sub>2</sub> )           | b                                            | *                                 | *                                       | *                                      | *                    |
| 18          |                                    |                                              | 14.66 (CH <sub>3</sub> )           | 0.99 (t, 7.5)                                | 132.15 (CH)                       | *                                       | 132.82 (CH)                            | *                    |
| 19          |                                    |                                              |                                    |                                              | 20.70 (CH <sub>2</sub> )          | 2.05 (qd, 7.4, 1.7)                     | 21.51 (CH <sub>2</sub> )               | 2.10 (m)             |
| 20          |                                    |                                              |                                    |                                              | 14.45 (CH <sub>3</sub> )          | 0.95 (t, 7.6)                           | 14.67 (CH <sub>3</sub> )               | 0.99 (m)             |
| 1'          | 66.68 (CH <sub>2</sub> )           | 4.16 (t, 5.9)                                | 66.59 (CH <sub>2</sub> )           | 4.16 (m)                                     | 65.36 (CH <sub>2</sub> )          | 4.10 (d, 6.7)                           | 66.60 (CH <sub>2</sub> )               | 4.16 (m)             |
| 2'          | 69.62 (CH)                         | 4.01 – 3.96 (m)                              | 69.63 (CH)                         | 4.00 (m)                                     | 68.60 (CH)                        | 4.06 – 4.02 (m)                         | 69.67 (CH)                             | 4.00 (m)             |
| 3'          | 71.88 (CH <sub>2</sub> )           | 3.66 (dd, 10.6, 4.5)<br>3.92 (dd, 10.6, 5.1) | 71.88 (CH <sub>2</sub> )           | 3.93 (dd, 10.6, 5.1)<br>3.67 (dd, 10.4, 4.5) |                                   | 3.89 – 3.84 (m)<br>3.71 (dd, 11.0, 2.9) | 72.12 (CH <sub>2</sub> )               | 3.86 (s)<br>3.66 (m) |
| 1''         | 105.33 (CH)                        | 4.23 (d, 7.6)                                | 105.33 (CH)                        | 4.24 (d, 7.6)                                | 103.54 (CH)                       | 4.31 (d, 7.6)                           | 105.33 (CH)                            | 4.26 (d, 7.5)        |
| 2''         | 72.57 (CH)                         | 3.53 (d, 7.6)                                | 72.56 (CH)                         | 3.55 (m)                                     | 71.20 (CH)                        | 3.56 (s)                                | 72.53 (CH)                             | 3.55 (dd, 9.8, 7.5)  |
| 3''         | 74.84 (CH)                         | 3.48 (d, 3.4)                                | 74.84 (CH)                         | 3.48 (dd, 9.7, 3.4)                          | 73.22 (CH)                        | 3.62 (dd, 10.0, 3.2)                    | 74.67 (CH)                             | 3.51 (dd, 9.7, 3.4)  |

|                                                                                |                          |                                |                          |                                              |                          |                      |                          |                            |
|--------------------------------------------------------------------------------|--------------------------|--------------------------------|--------------------------|----------------------------------------------|--------------------------|----------------------|--------------------------|----------------------------|
| 4''                                                                            | 70.27 (CH)               | 3.82 (d, 2.3)                  | 70.27 (CH)               | 3.83 (d, 2.3)                                | 68.76 (CH)               | 3.97 – 3.94 (m)      | 70.10 (CH)               | 3.88 (d, 5.4)              |
| 5''                                                                            | 76.78 (CH)               | 3.51 (dt, 7.6, 2.0)            | 76.78 (CH)               | 3.53 (m)                                     | 74.86 (CH)               | 3.58 (dd, 7.3, 2.4)  | 74.57(CH)                | 3.77 (d, 8.1)              |
| 6''                                                                            | 62.48 (CH <sub>2</sub> ) | 3.73 (d, 5.3)<br>3.75 (d, 7.0) | 62.47 (CH <sub>2</sub> ) | 3.77 (dd, 11.3, 6.9)<br>3.73 (dd, 11.3, 5.3) | 60.97 (CH <sub>2</sub> ) | 3.74 (d, 6.6)        | 67.78 (CH <sub>2</sub> ) | 3.91 (m)<br>3.70 (d, 3.7)  |
| 1'''                                                                           |                          |                                |                          |                                              |                          |                      | 100.56                   | 4.86 (d, 3.8) <sup>c</sup> |
| 2'''                                                                           |                          |                                |                          |                                              |                          |                      | 70.24                    | 3.79 (dd, 10.1, 3.7)       |
| 3'''                                                                           |                          |                                |                          |                                              |                          |                      | 71.47                    | 3.75 (d, 6.9)              |
| 4'''                                                                           |                          |                                |                          |                                              |                          |                      | 71.06                    | 3.90 (m)                   |
| 5'''                                                                           |                          |                                |                          |                                              |                          |                      | 72.57                    | 3.86 (d, 5.3)              |
| 6'''                                                                           |                          |                                |                          |                                              |                          |                      | 62.75                    | 3.73 (m)                   |
| *<br>Olefinic groups<br>(CH)                                                   | 128.19                   |                                |                          |                                              | 129.05                   |                      | 130.04                   |                            |
|                                                                                | 128.91                   |                                |                          |                                              | 129.03                   |                      | 129.91                   |                            |
|                                                                                | 129.06                   |                                | 129.43                   |                                              | 128.72                   |                      | 129.47                   |                            |
|                                                                                | 129.08                   |                                | 129.30                   |                                              | 128.46                   |                      | 129.25                   |                            |
|                                                                                | 129.24                   | 5.28 – 5.43 (m)                | 129.23                   | 5.37 (8H, m)                                 | 128.42                   | 5.40 – 5.26 (10H, m) | 129.20                   | 5.44 – 5.29 (10H, m)       |
|                                                                                | 129.48                   |                                | 129.03                   |                                              | 128.29                   |                      | 129.13                   |                            |
|                                                                                | 130.31                   |                                | 128.96                   |                                              | 128.19                   |                      | 129.11                   |                            |
|                                                                                | 132.81<br>(C14)          |                                | 128.20                   |                                              | 127.99                   |                      | 128.94                   |                            |
| **<br>Methylene groups<br>between the<br>olefinic groups<br>(CH <sub>2</sub> ) |                          |                                |                          |                                              | 127.16                   |                      | 128.20                   |                            |
|                                                                                | 26.42                    |                                | 26.57                    |                                              | 26.69 (2C)               |                      | 26.57 (2C)               |                            |
|                                                                                | 26.49                    | 2.85 – 2.80 (2H, m)            | 26.53                    | 2.83 (6H, m)                                 | 25.75                    | 2.78 (4H, t, 7.0)    | 26.55                    | 2.86                       |
|                                                                                | 26.51                    | 2.88 – 2.84 (4H, m)            | 26.42                    |                                              | 25.68                    | 2.84 – 2.80 (4H, m)  | 26.44                    | (8H, dt, 16.3, 5.3)        |

<sup>a</sup> H-2 and H-3 are overlapping (also reported by [68])

<sup>b</sup> H-5 and H-17 appear as one multiplet

<sup>c</sup> Determined in acetone-*d*<sub>6</sub>

## NMR spectra of new compounds

**Figure S1.** 1D and 2D-NMR spectra of **7**.

**(a)**  $^1\text{H}$ -NMR spectrum of **7** (1:1 (v/v) methanol- $d_4$  / water- $d_2$ , 289 K, 600 MHz).

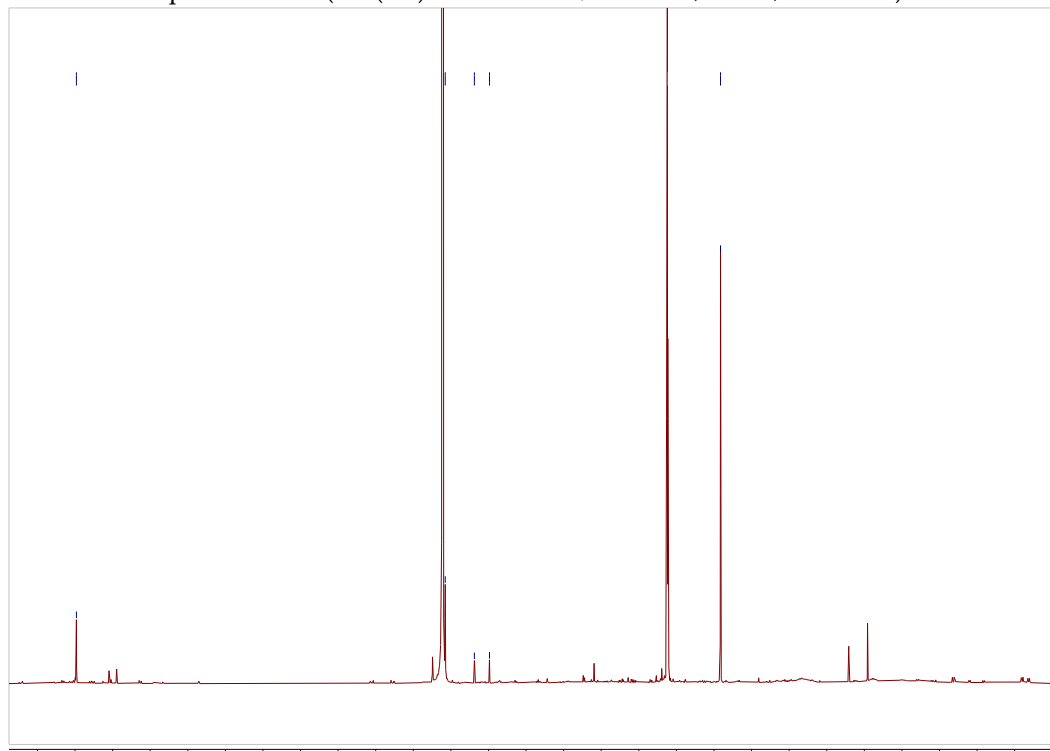

**(b)**  $^{13}\text{C}$ -NMR spectrum of **7** (1:1 (v/v) methanol- $d_4$  / water- $d_2$ , 289 K, 600 MHz).

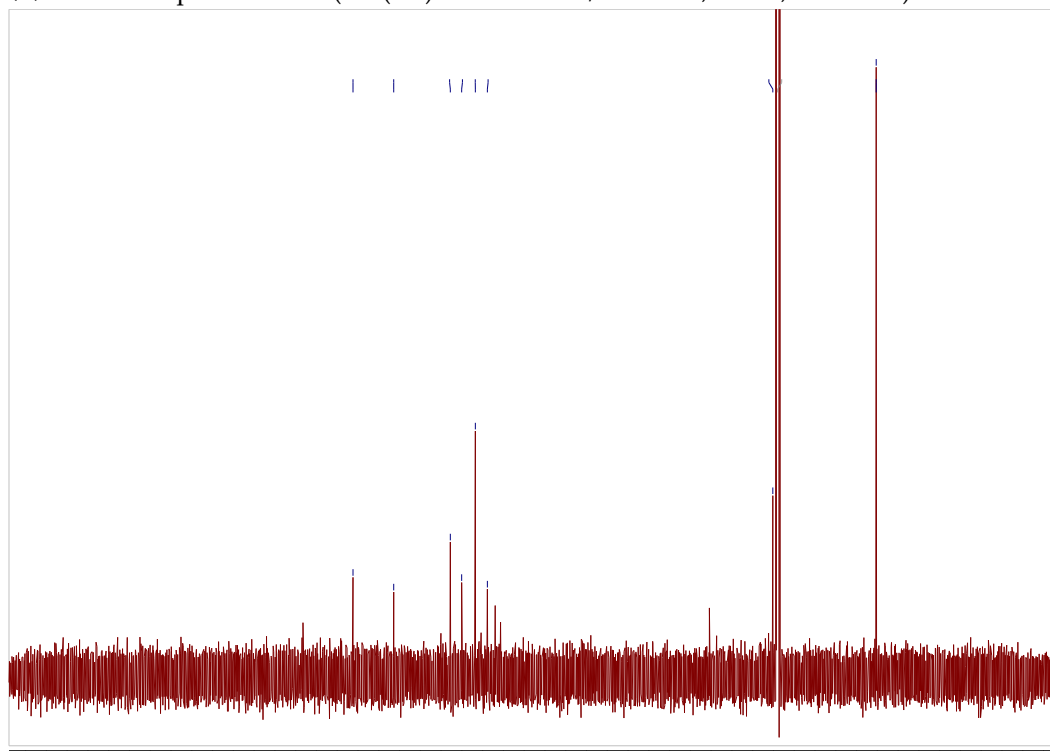

(c) HSQC spectrum of **7** (1:1 (v/v) methanol- $d_4$  / water- $d_2$ , 289 K, 600 MHz).

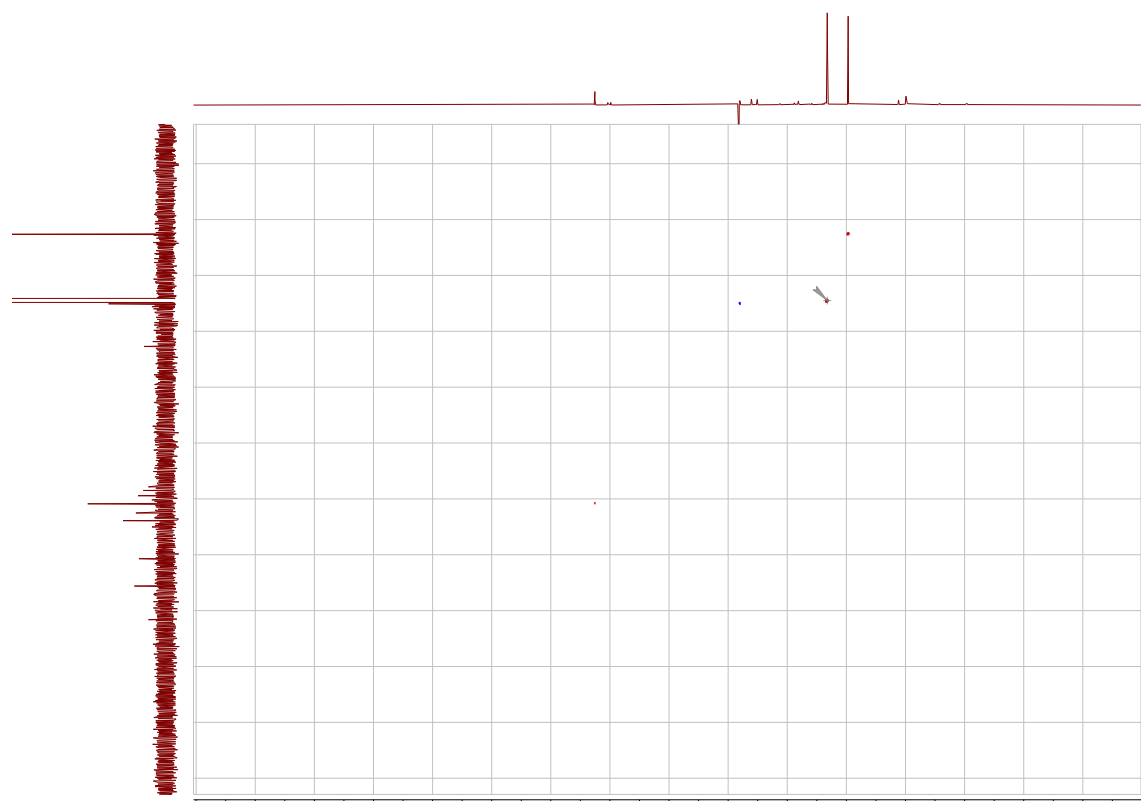

(d) HMBC spectrum of **7** (1:1 (v/v) methanol- $d_4$  / water- $d_2$ , 289 K, 600 MHz).

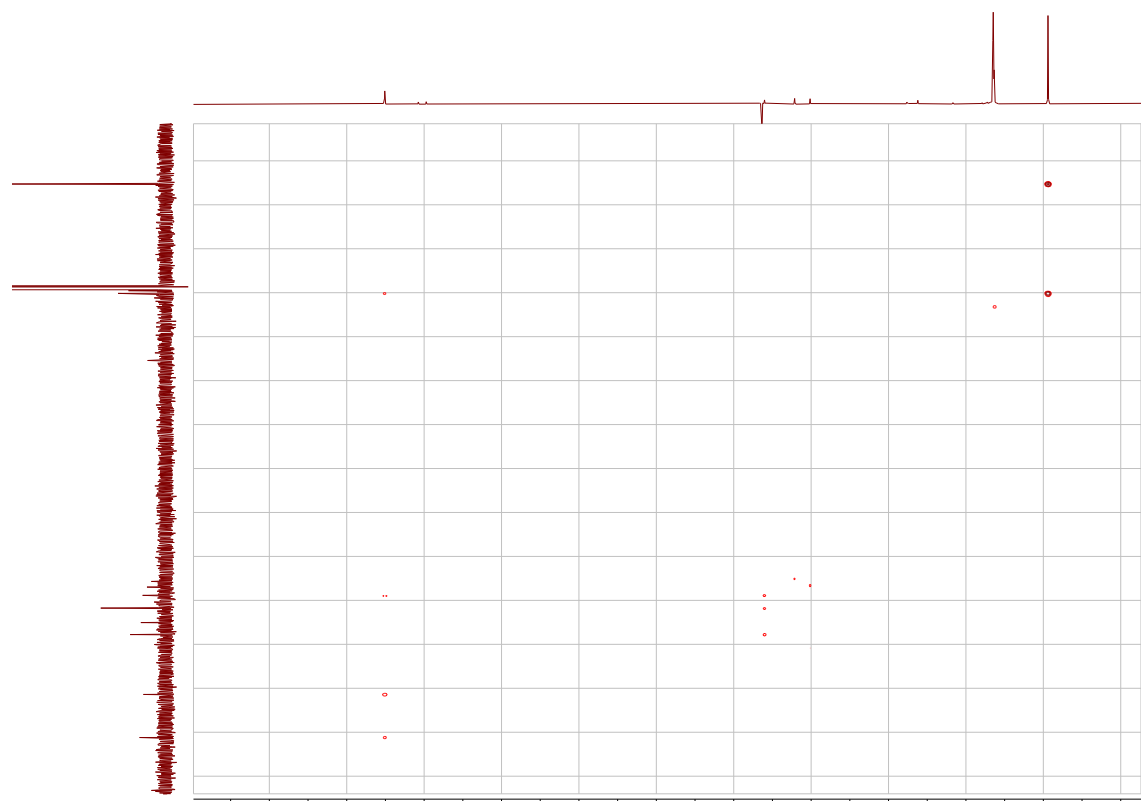

**(e)** COSY spectrum of **7** (1:1 (*v/v*) methanol-*d*<sub>4</sub> / water-*d*<sub>2</sub>, 289 K, 600 MHz).

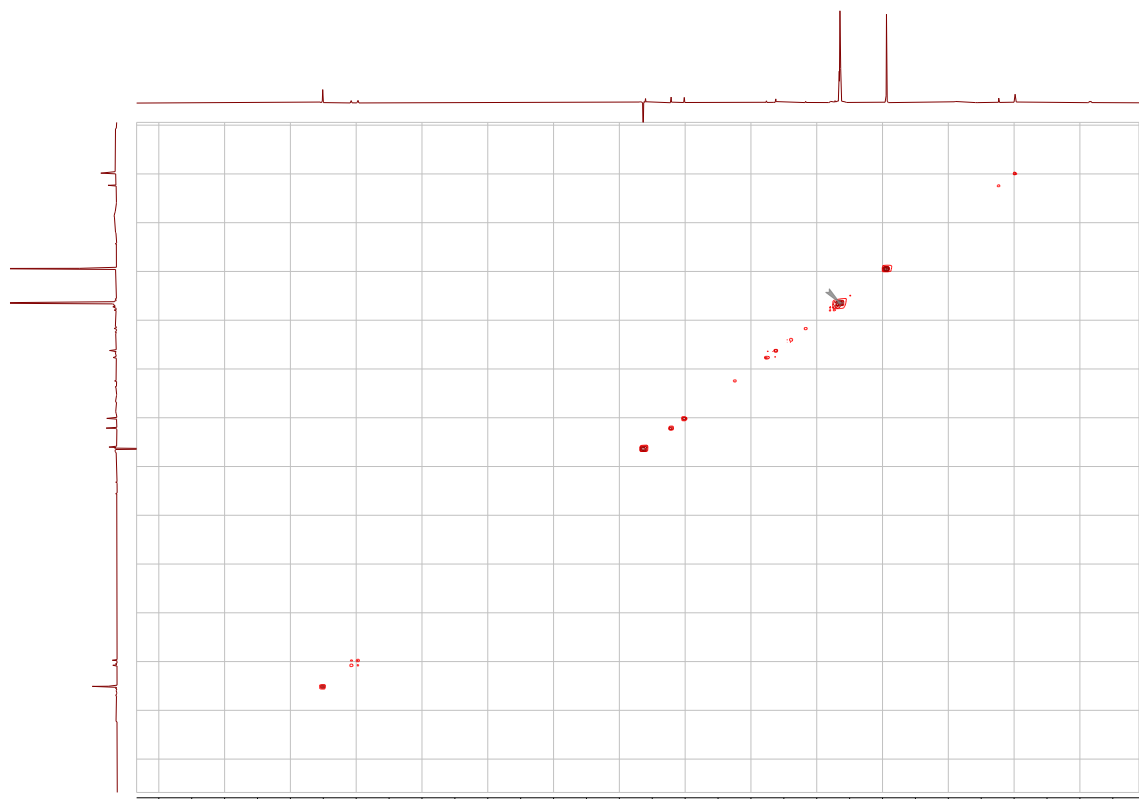

**Figure S2.** 1D and 2D-NMR spectra of **12**.

**(a)** <sup>1</sup>H-NMR spectrum of **12** (water-*d*<sub>2</sub>, 289 K, 600 MHz).

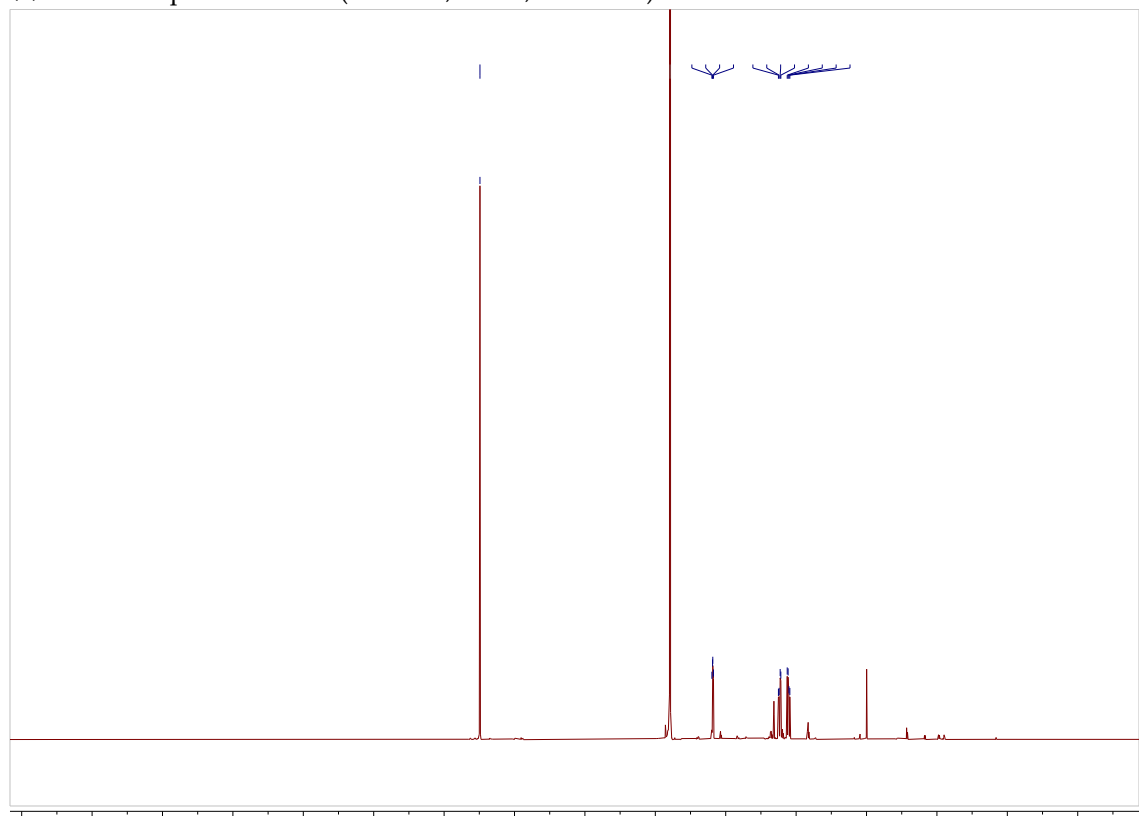

**(b)**  $^{13}\text{C}$ -NMR spectrum of **12** (water- $d_2$ , 289 K, 151 MHz).

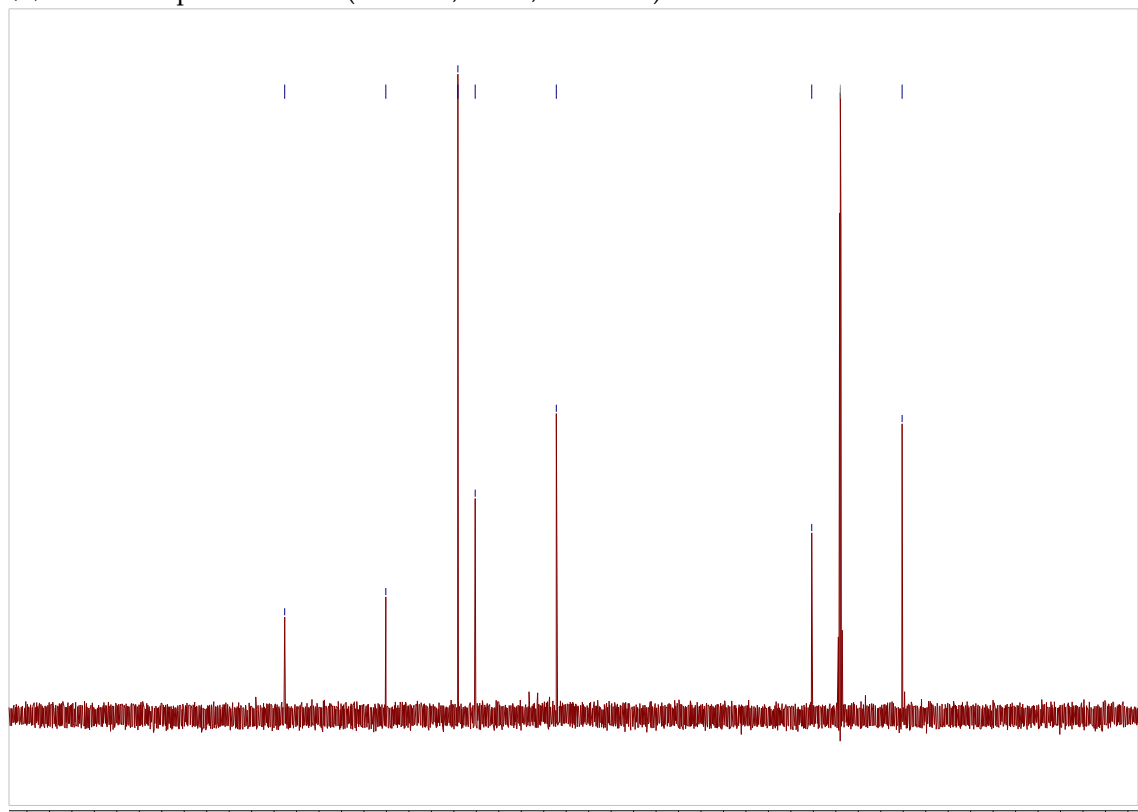

**(c)** HSQC spectrum of **12** (water- $d_2$ , 289 K, 600 MHz).

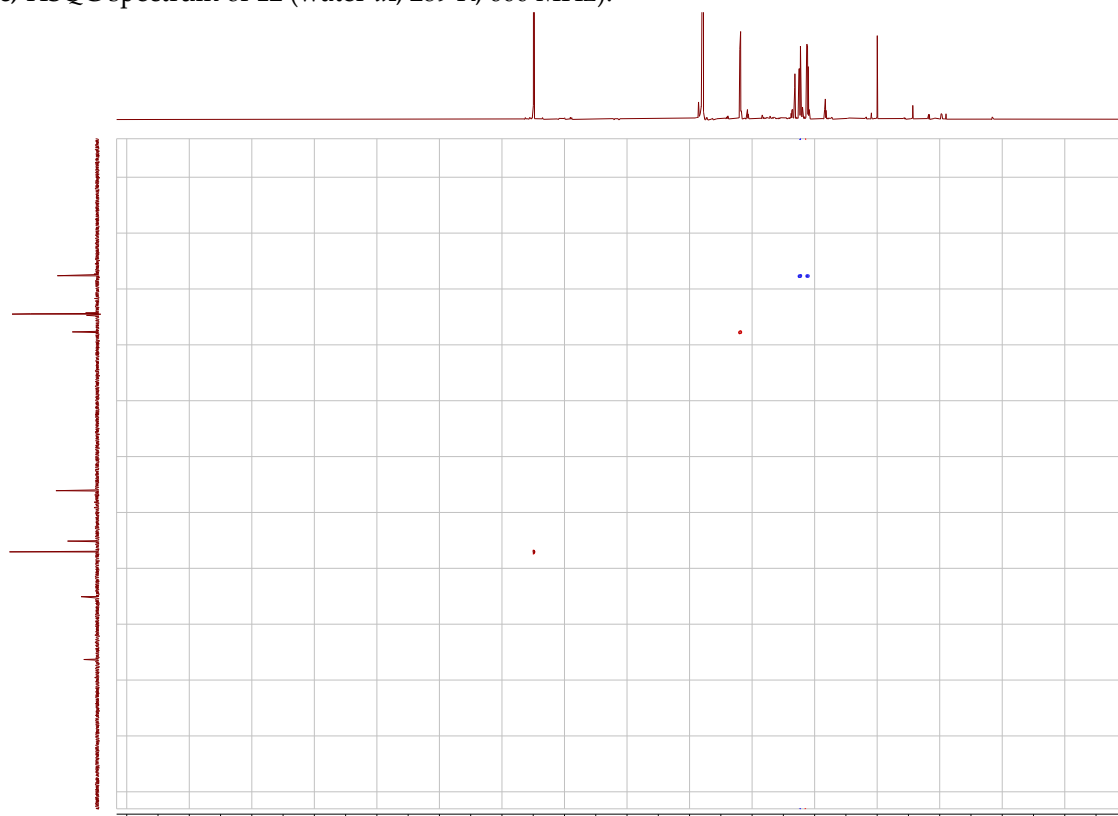

**(d)** HMBC spectrum of **12** (water- $d_2$ , 289 K, 600 MHz).

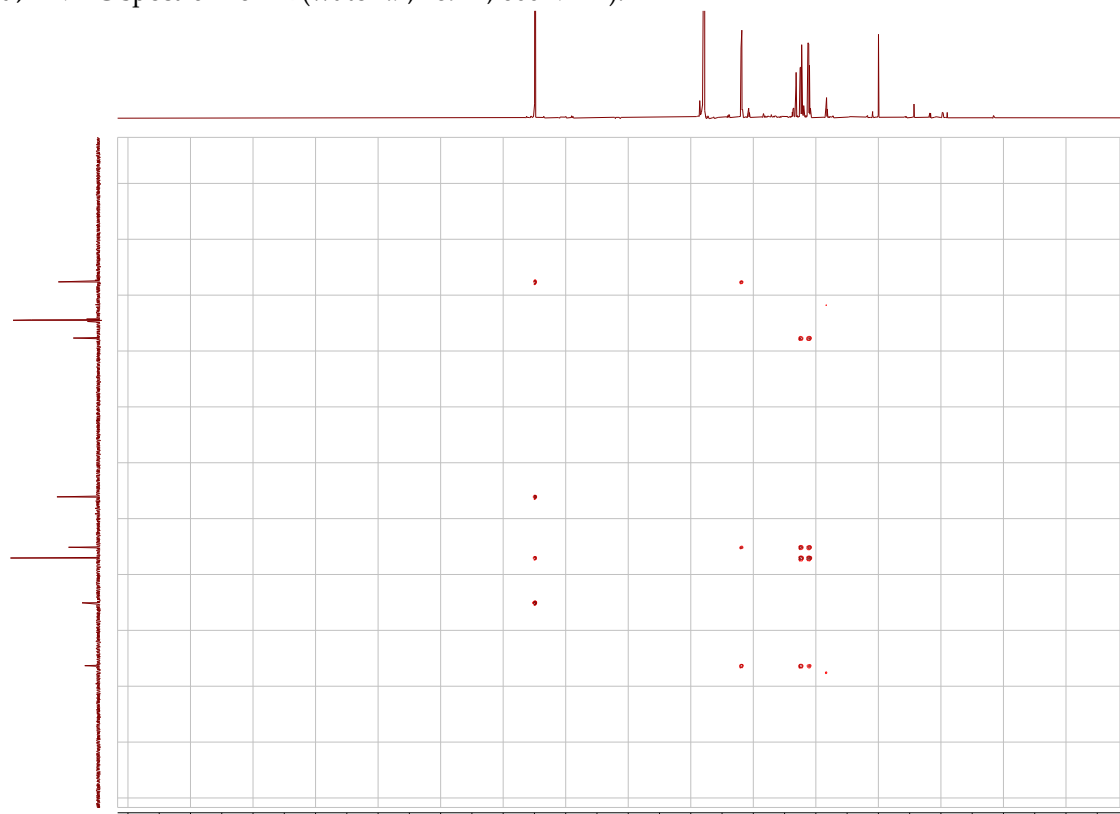

**(e)** COSY spectrum of **12** (water- $d_2$ , 289 K, 600 MHz).

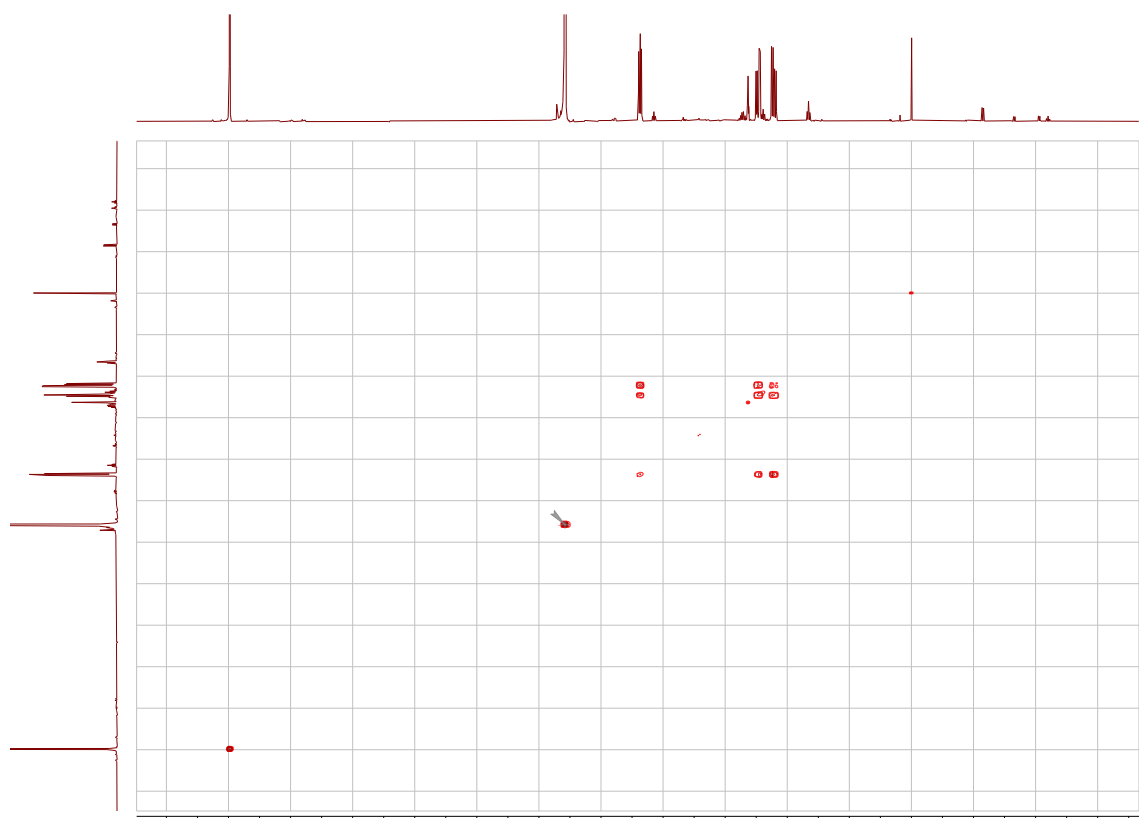

**Figure S3.** 1D and 2D-NMR spectra of **13**.

**(a)**  $^1\text{H}$ -NMR spectrum of **13** (water- $d_2$ , 289 K, 600 MHz).

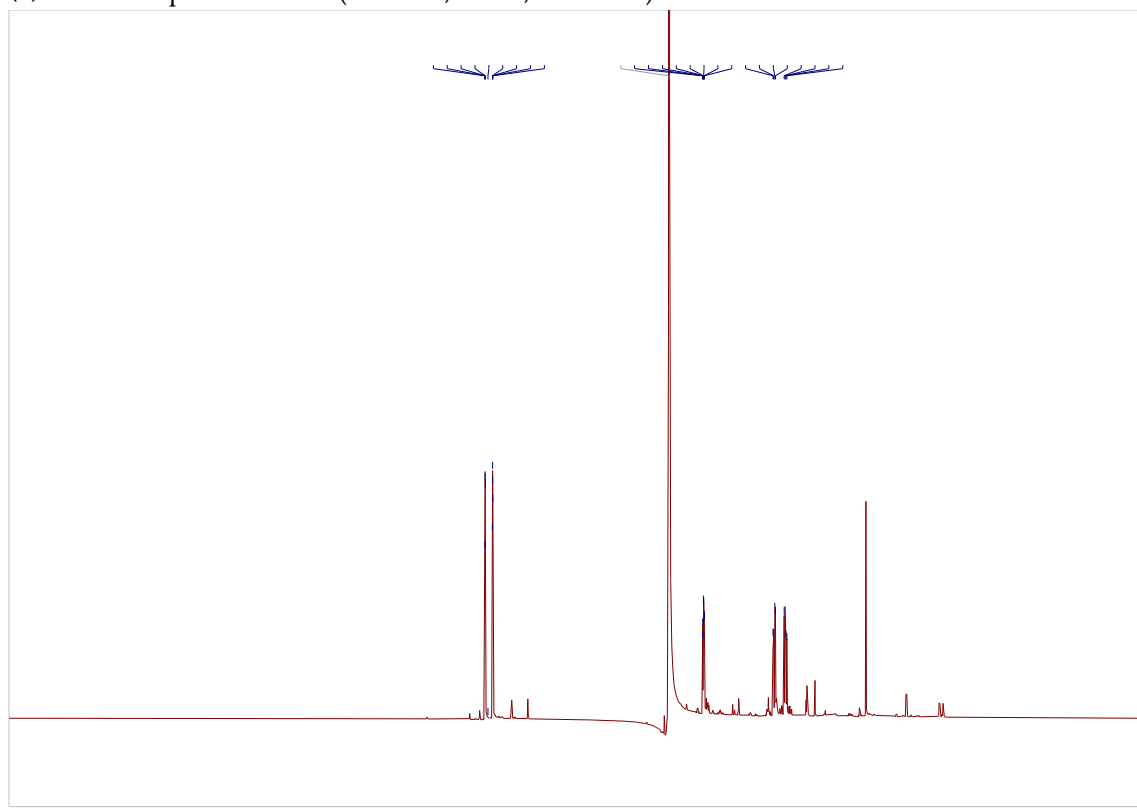

**(b)**  $^{13}\text{C}$ -NMR spectrum of **13** (water- $d_2$ , 289 K, 151 MHz).

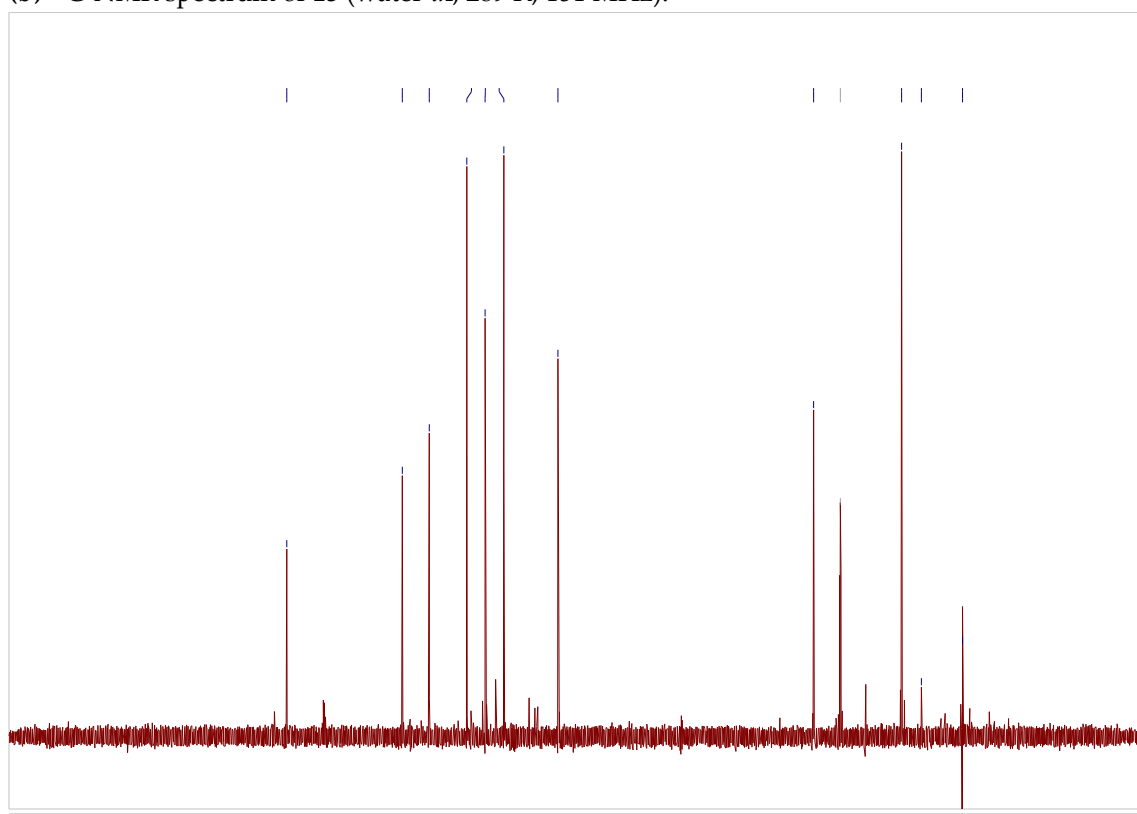

(c) HSQC spectrum of **13** (water- $d_2$ , 289 K, 600 MHz).

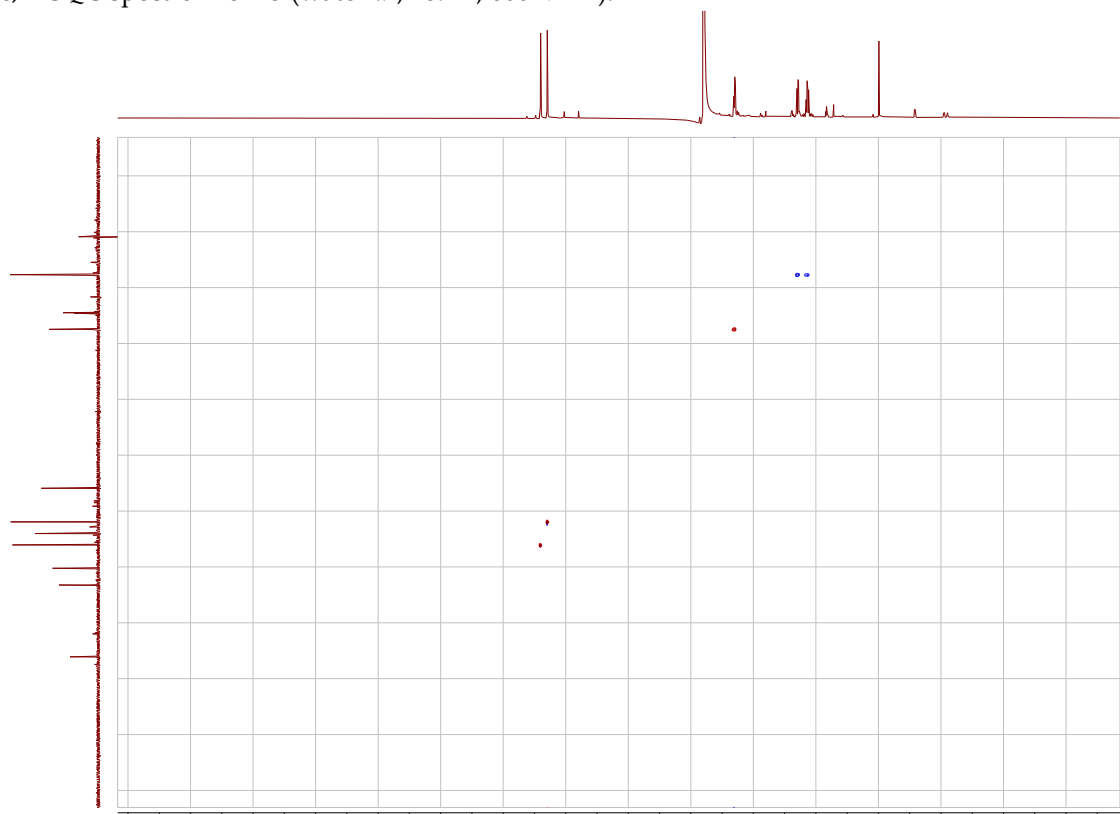

(d) HMBC spectrum of **13** (water- $d_2$ , 289 K, 600 MHz).

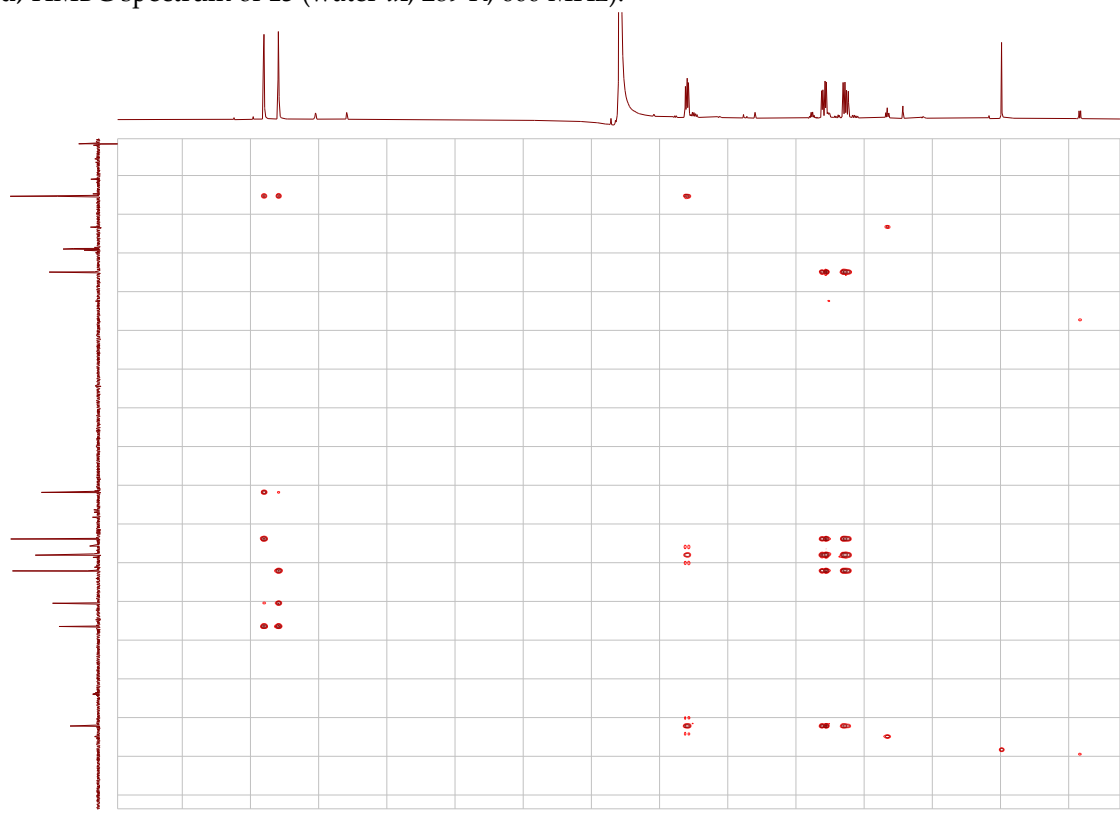

**Figure S4.** 1D and 2D-NMR spectra of **14**.

**(a)**  $^1\text{H}$ -NMR spectrum of **14** (methanol- $d_4$ , 289 K, 600 MHz).

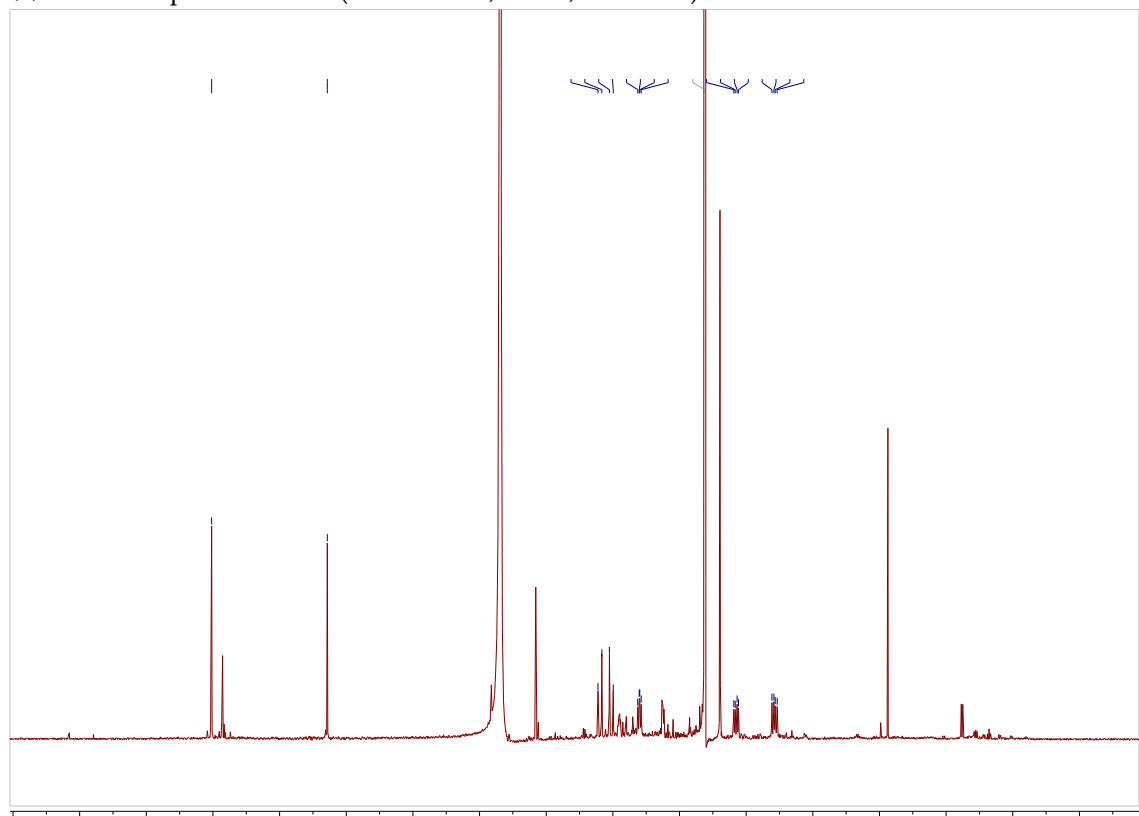

(b)  $^{13}\text{C}$ -NMR spectrum of **14** (methanol- $d_4$ , 289 K, 151 MHz).

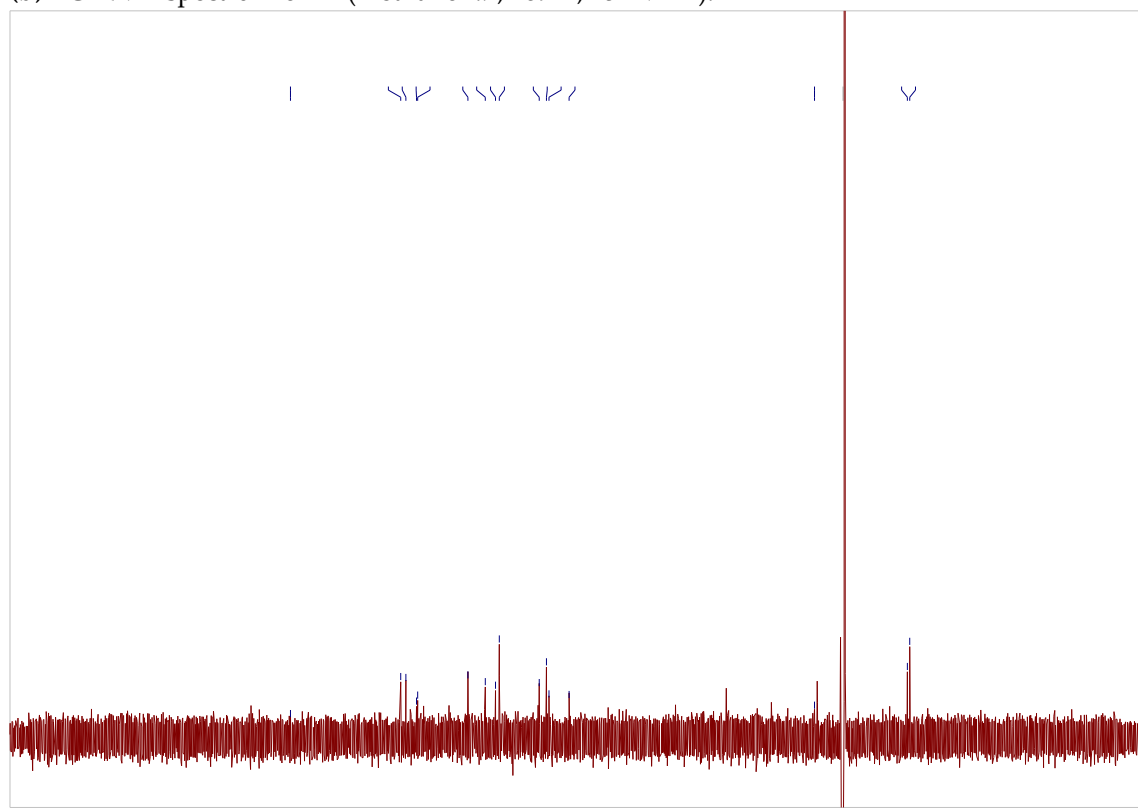

(c) HSQC spectrum of **14** (methanol- $d_4$ , 289 K, 600 MHz).

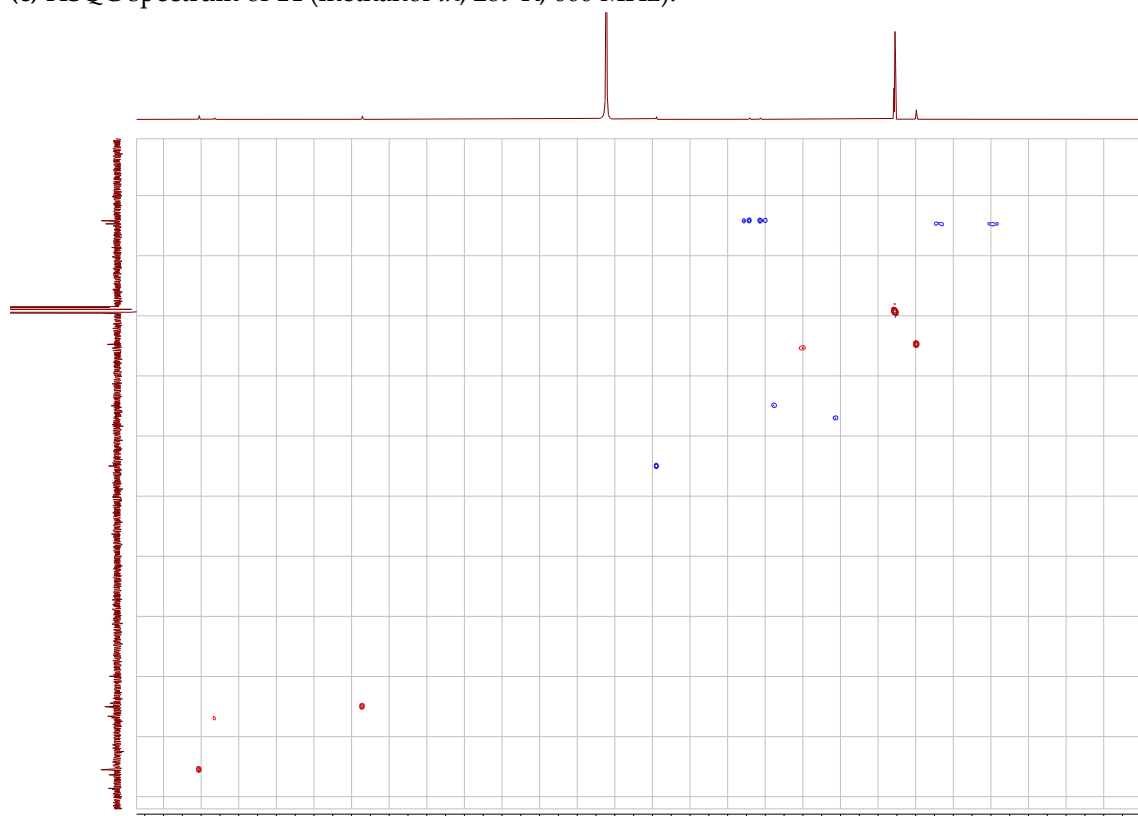

(d) HMBC spectrum of **14** (methanol- $d_4$ , 289 K, 600 MHz).

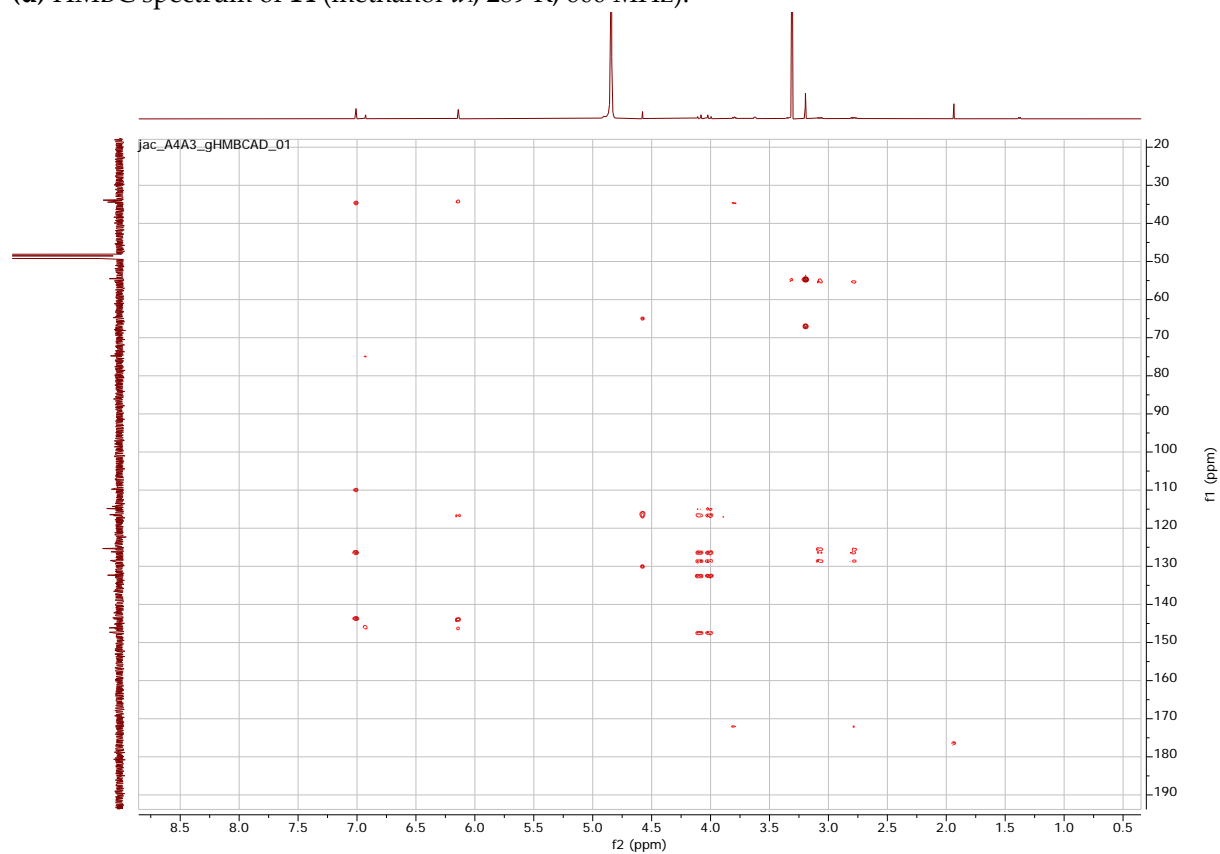

(e) COSY spectrum of **14** (methanol- $d_4$ , 289 K, 600 MHz).

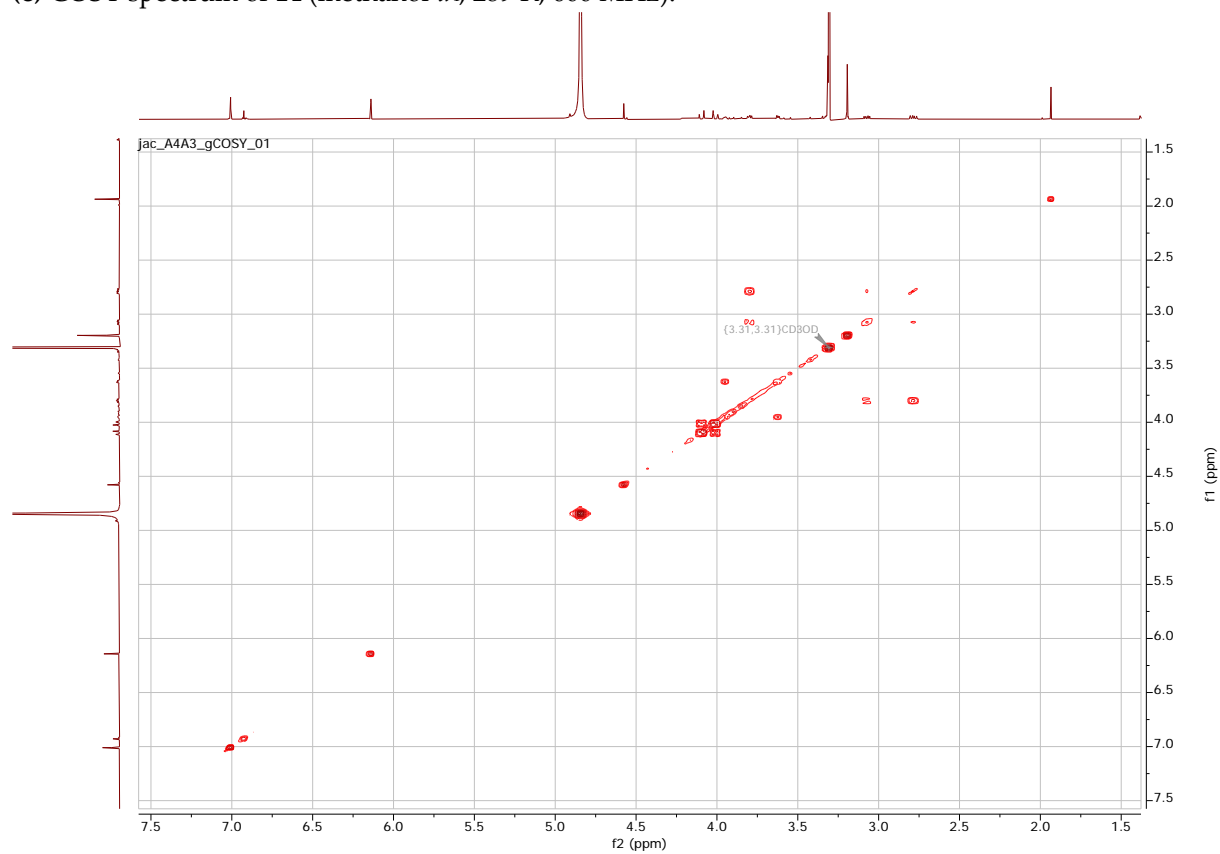

**Figure S5.** 1D and 2D-NMR spectra of **15**.

**(a)**  $^1\text{H}$ -NMR spectrum of **15** (1:1 (*v/v*) methanol- $d_4$  / water- $d_2$ , 289 K, 600 MHz).

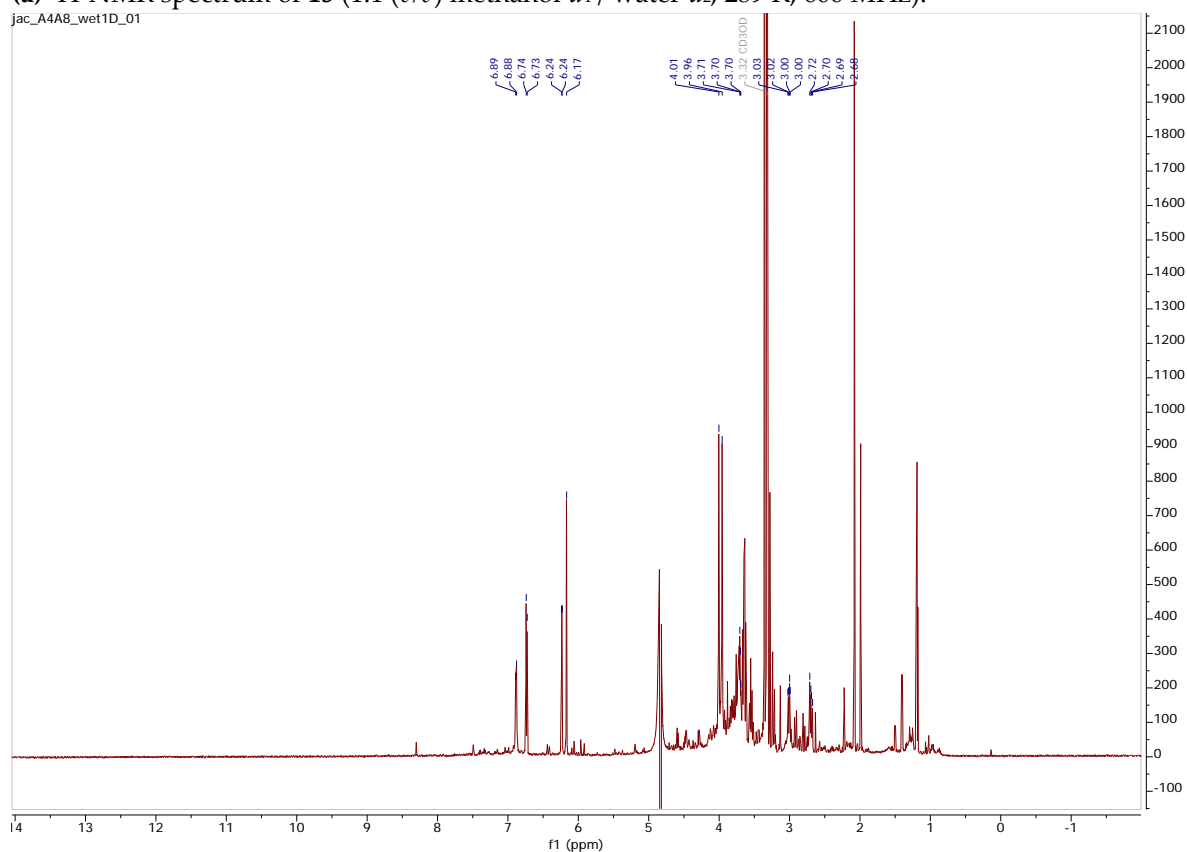

**(b)**  $^{13}\text{C}$ -NMR spectrum of **15** (1:1 (*v/v*) methanol- $d_4$  / water- $d_2$ , 289 K, 600 MHz).

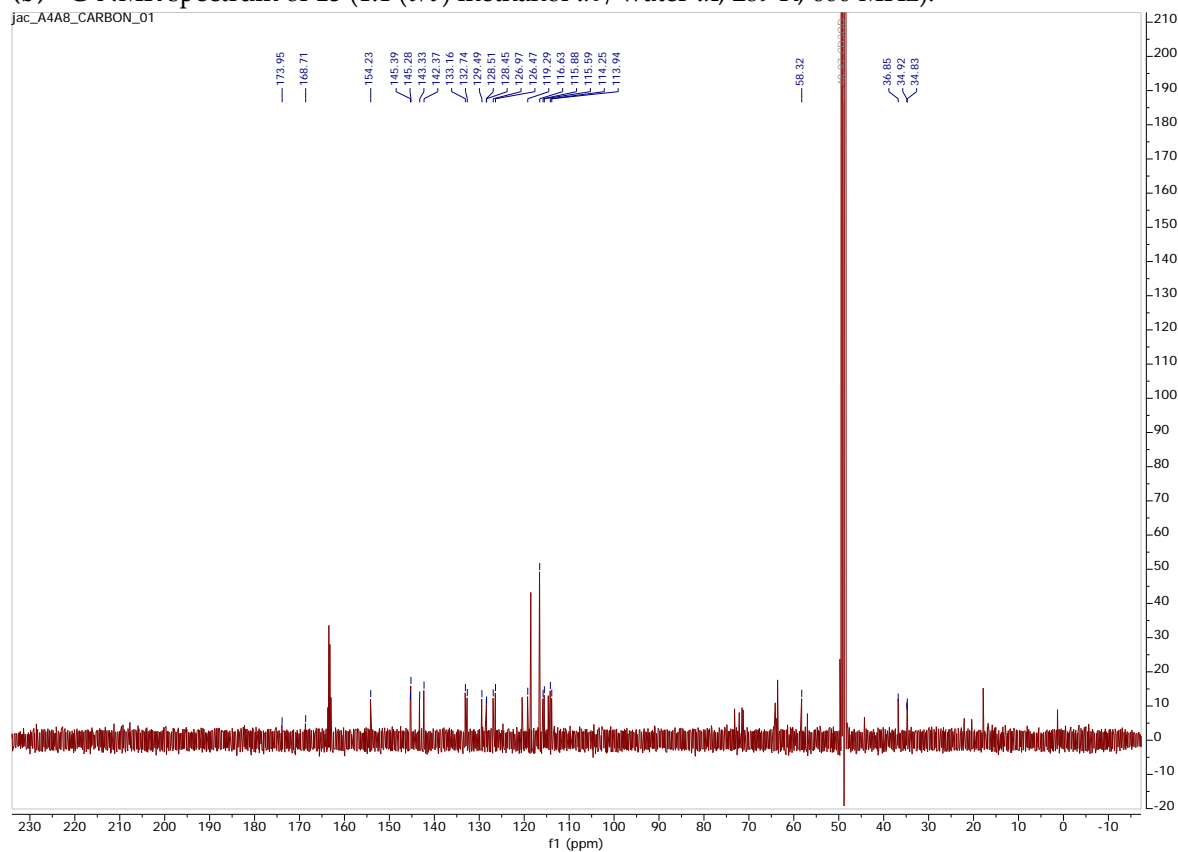

(c) HSQC spectrum of **15** (1:1 (*v/v*) methanol-*d*<sub>4</sub> / water-*d*<sub>2</sub>, 289 K, 600 MHz).

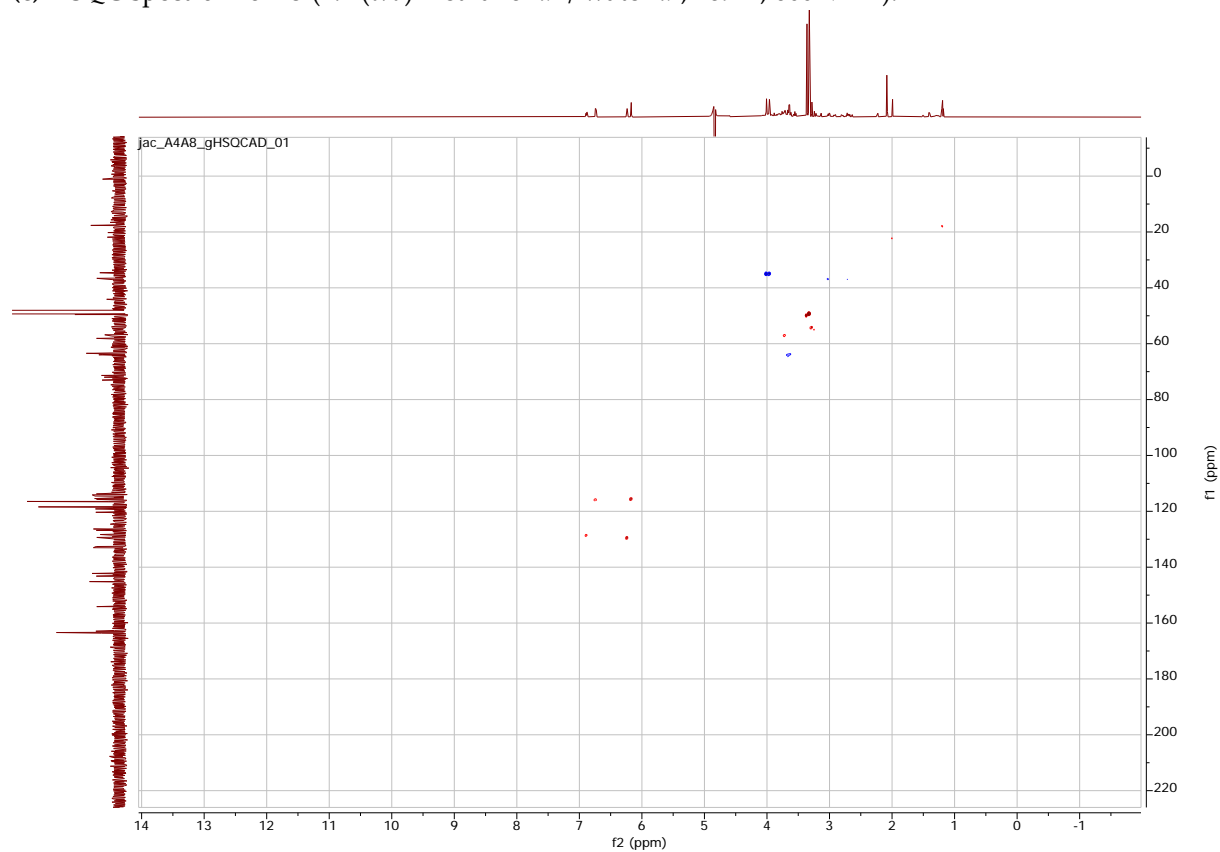

(d) HMBC spectrum of **15** (1:1 (*v/v*) methanol-*d*<sub>4</sub> / water-*d*<sub>2</sub>, 289 K, 600 MHz).

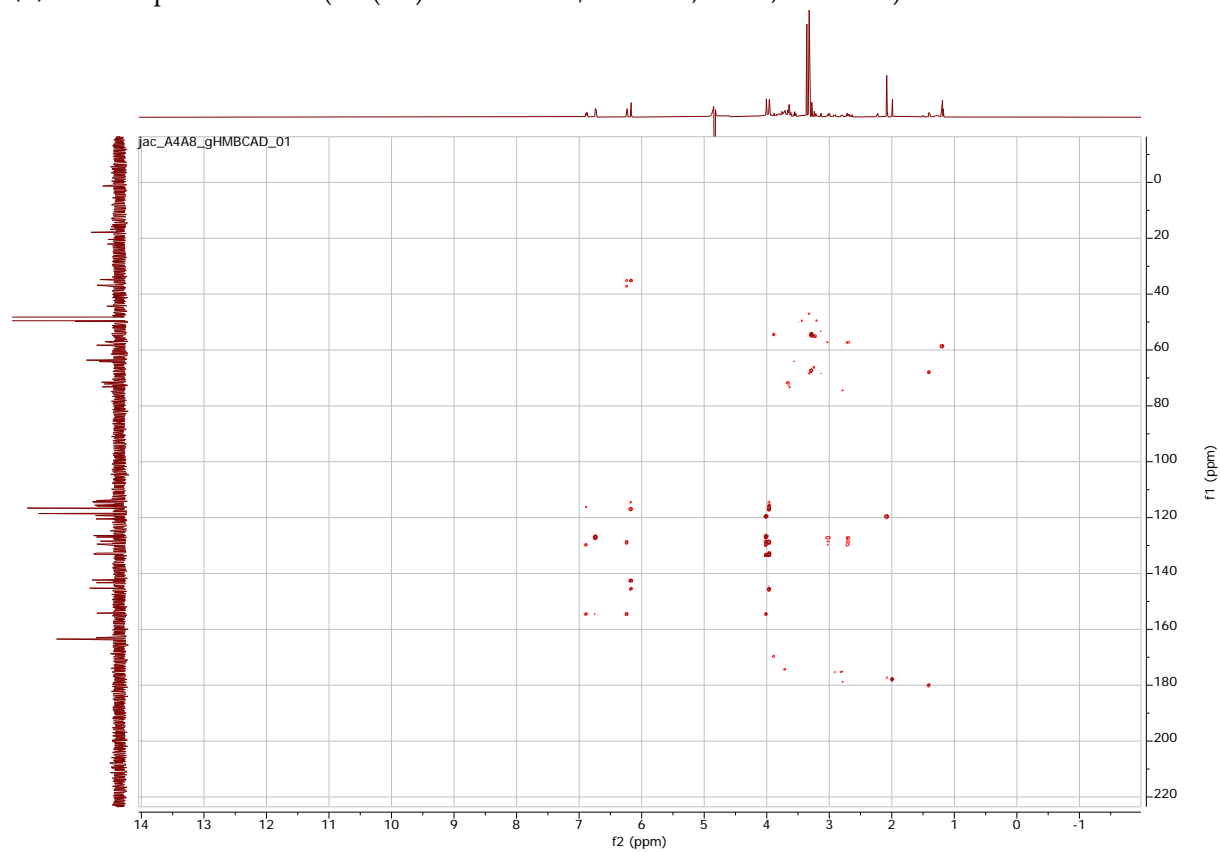

(a)  $^1\text{H}$ -NMR spectrum of **16** (methanol- $d_4$ , 289 K, 600 MHz).

(b)  $^{13}\text{C}$ -NMR spectrum of **16** (methanol- $d_4$ , 289 K, 151 MHz).

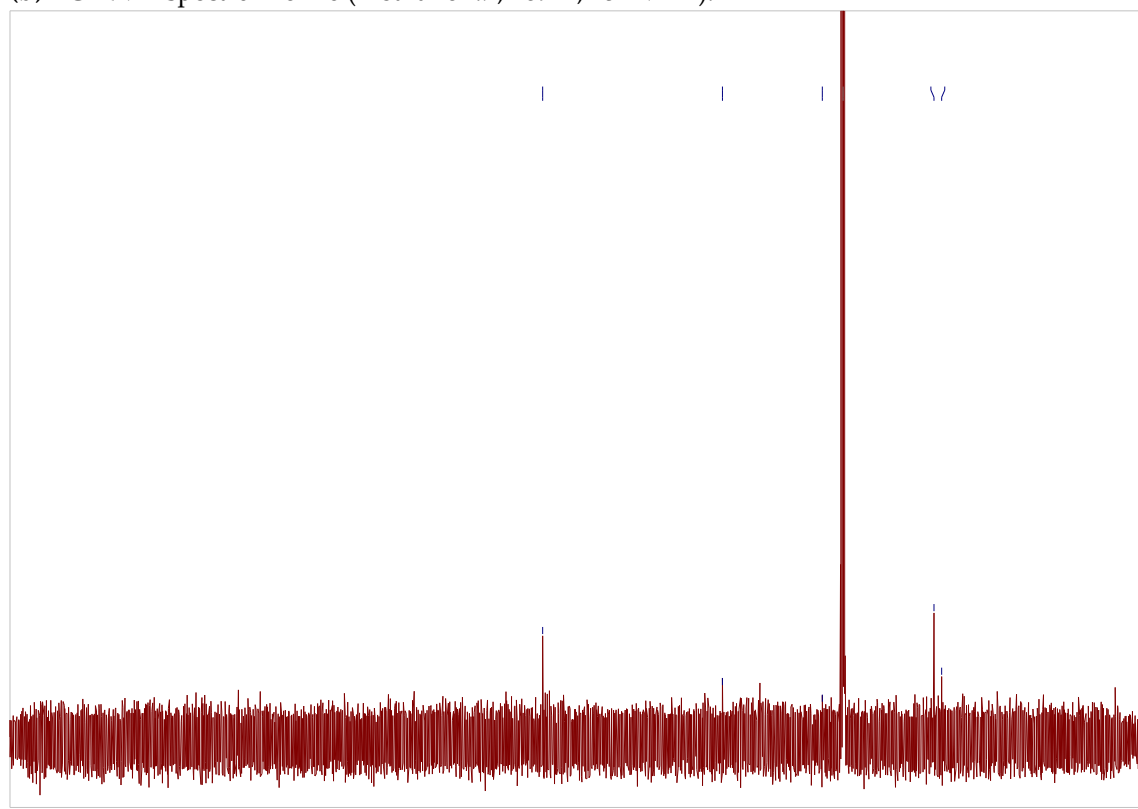

(c) HSQC spectrum of **16** (methanol- $d_4$ , 289 K, 600 MHz).

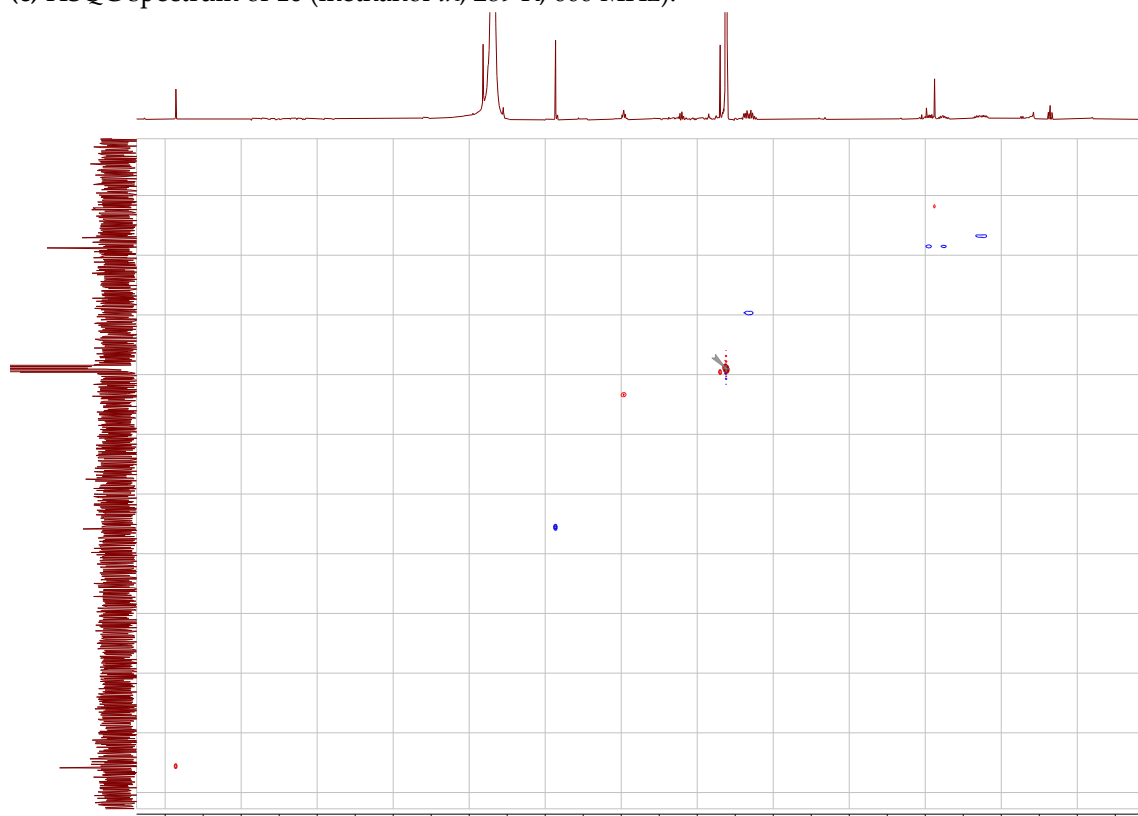

(d) HMBC spectrum of **16** (methanol- $d_4$ , 289 K, 600 MHz).

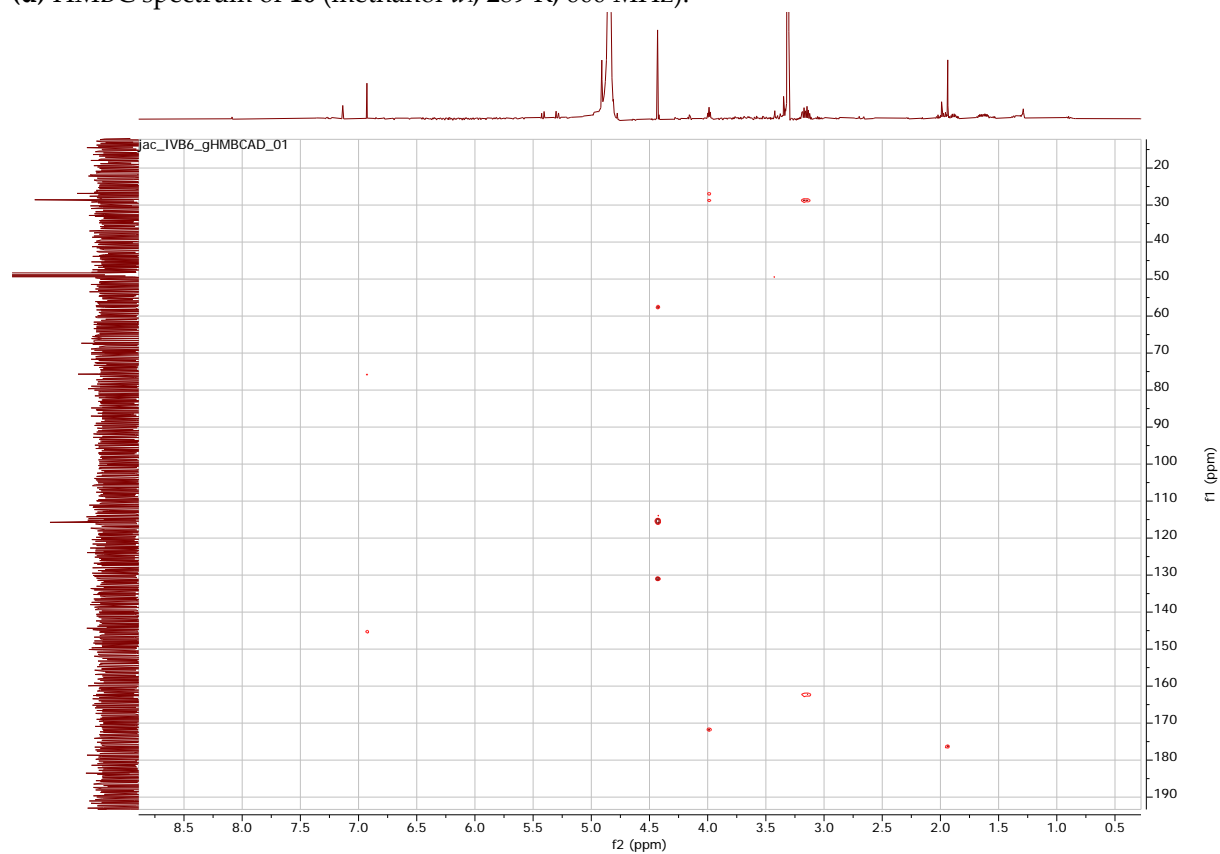

(e) COSY spectrum of **16** (methanol- $d_4$ , 289 K, 600 MHz).

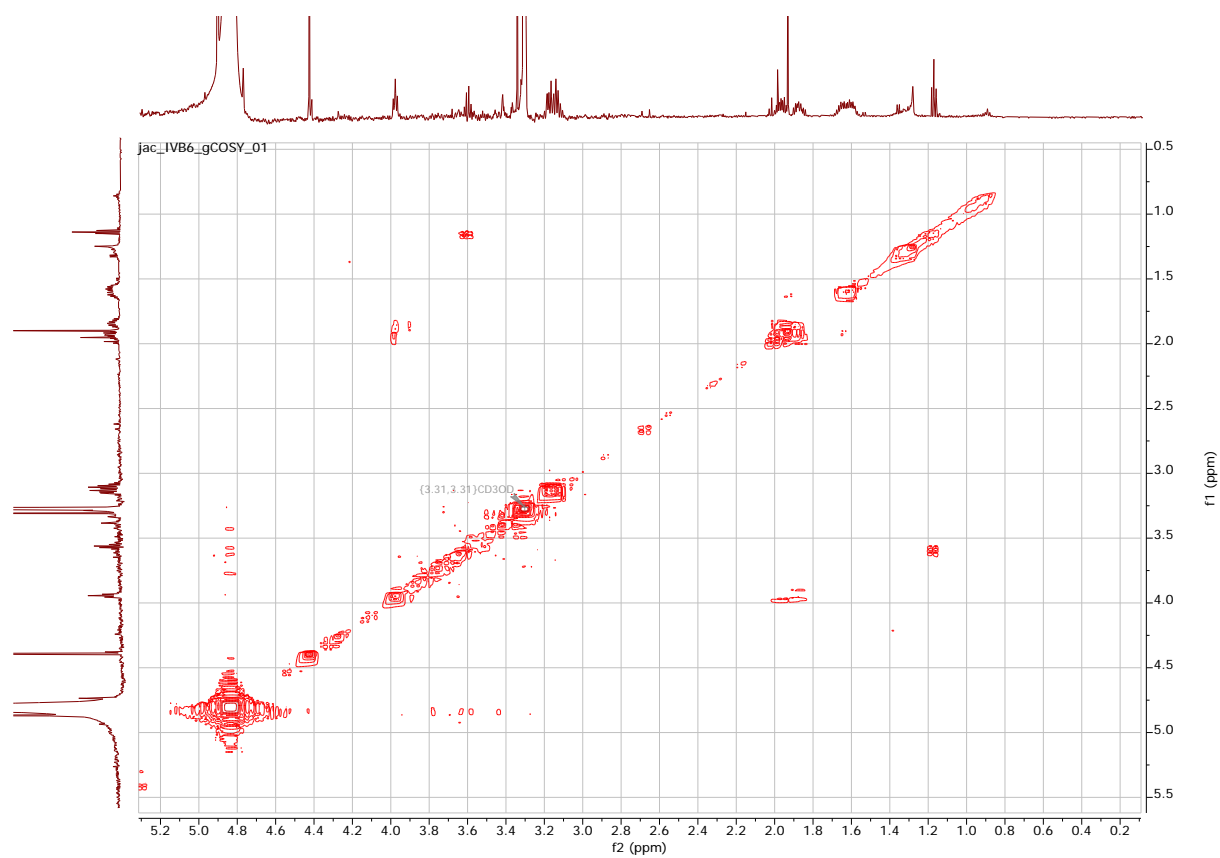

**Figure S7.** 1D and 2D-NMR spectra of **23**.

**(a)**  $^1\text{H}$ -NMR spectrum of **23** (methanol- $d_4$ , 289 K, 600 MHz).

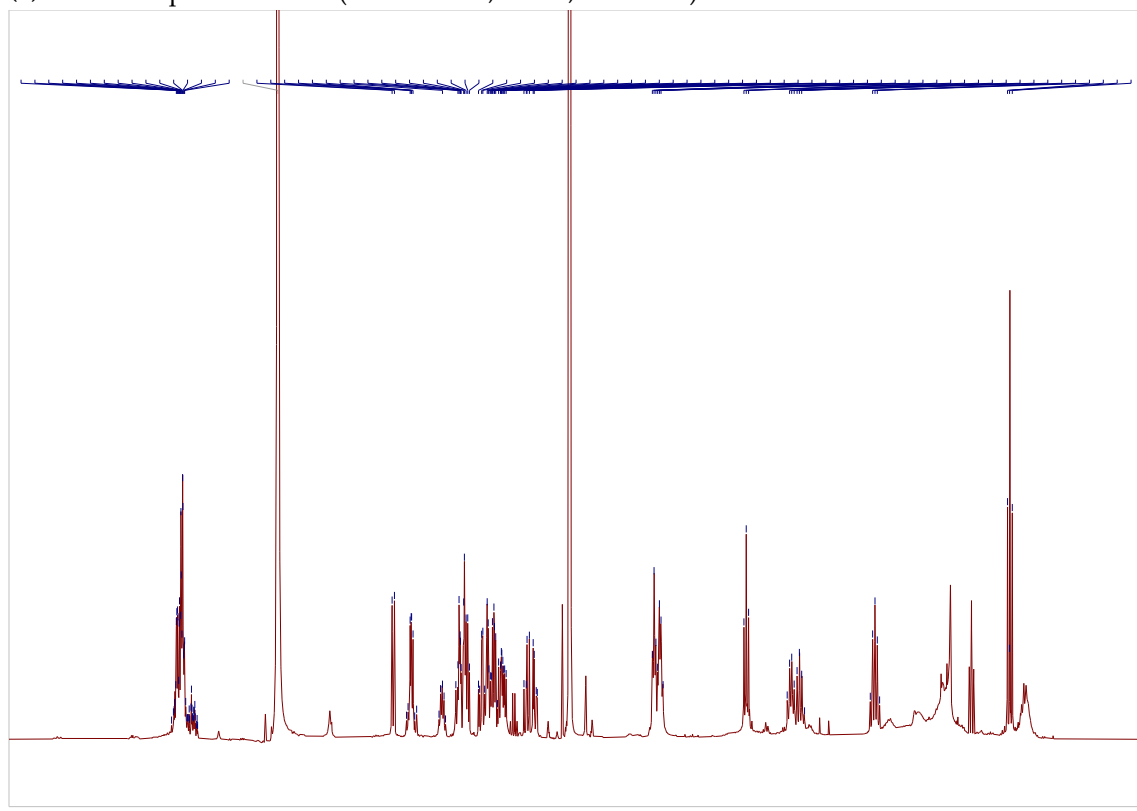

**(b)**  $^{13}\text{C}$ -NMR spectrum of **23** (methanol- $d_4$ , 289 K, 151 MHz).

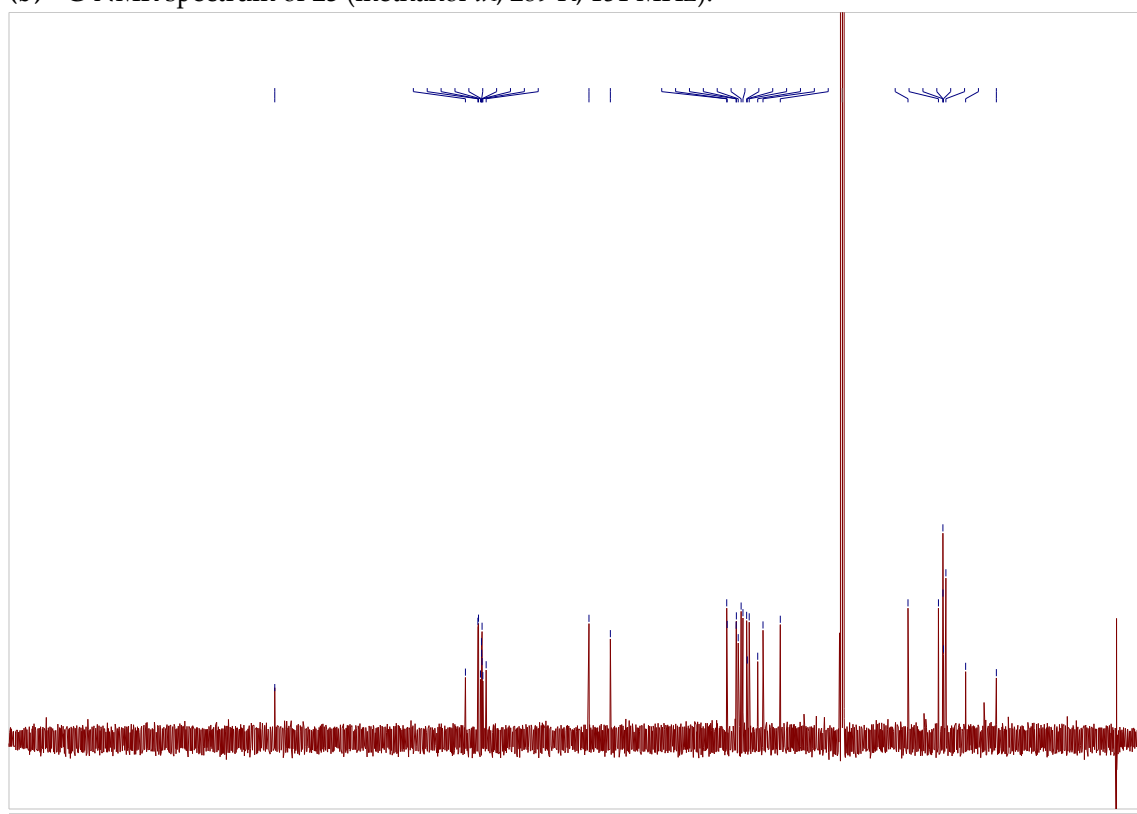

(c) HSQC spectrum of **23** (methanol- $d_4$ , 289 K, 600 MHz).

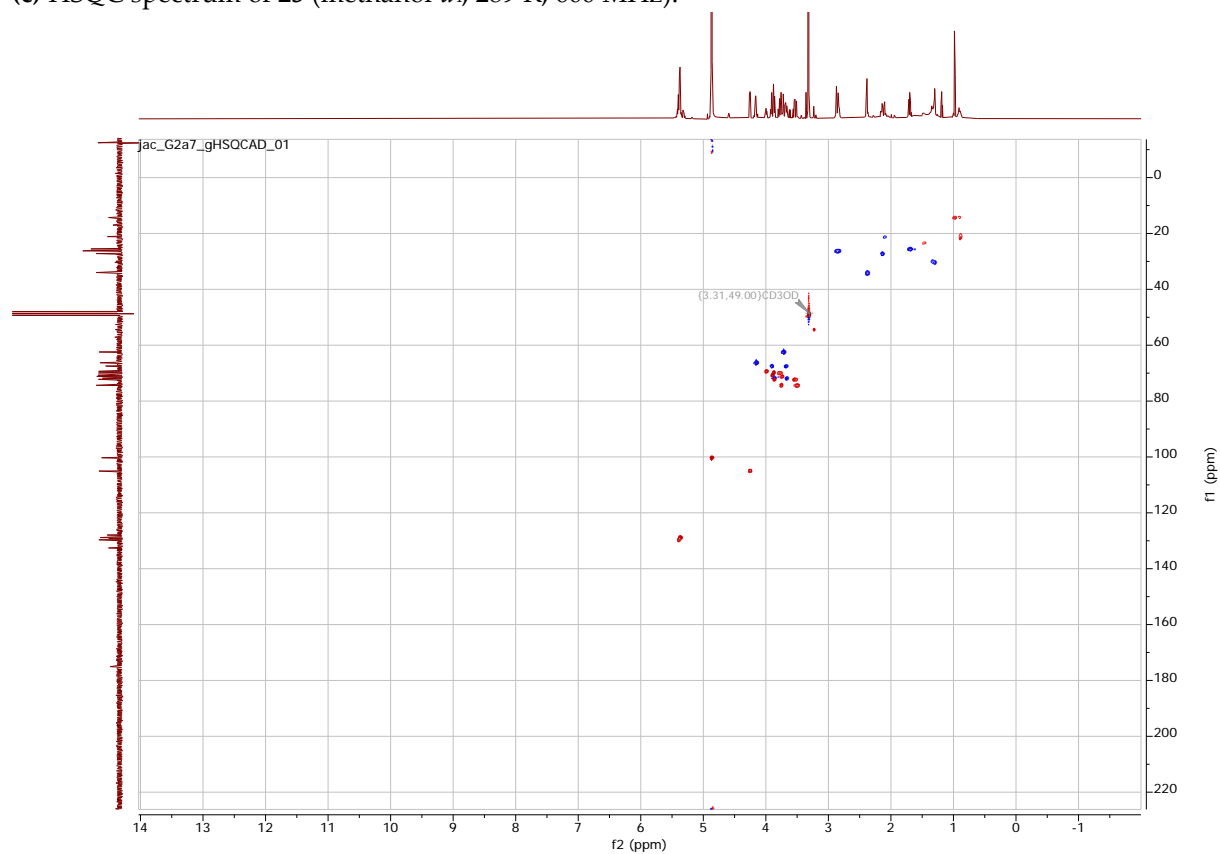

(d) HMBC spectrum of **23** (methanol- $d_4$ , 289 K, 600 MHz).

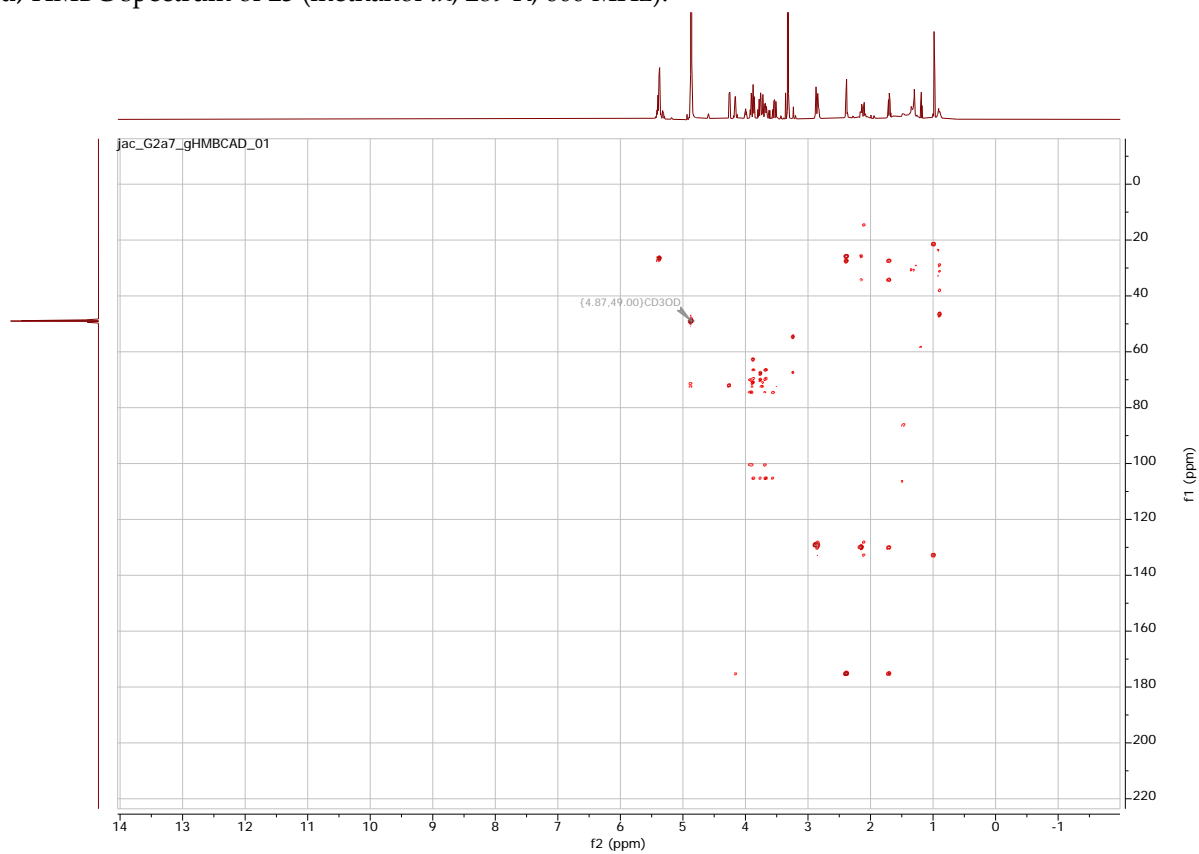

(e) COSY spectrum of **23** (methanol- $d_4$ , 289 K, 600 MHz).

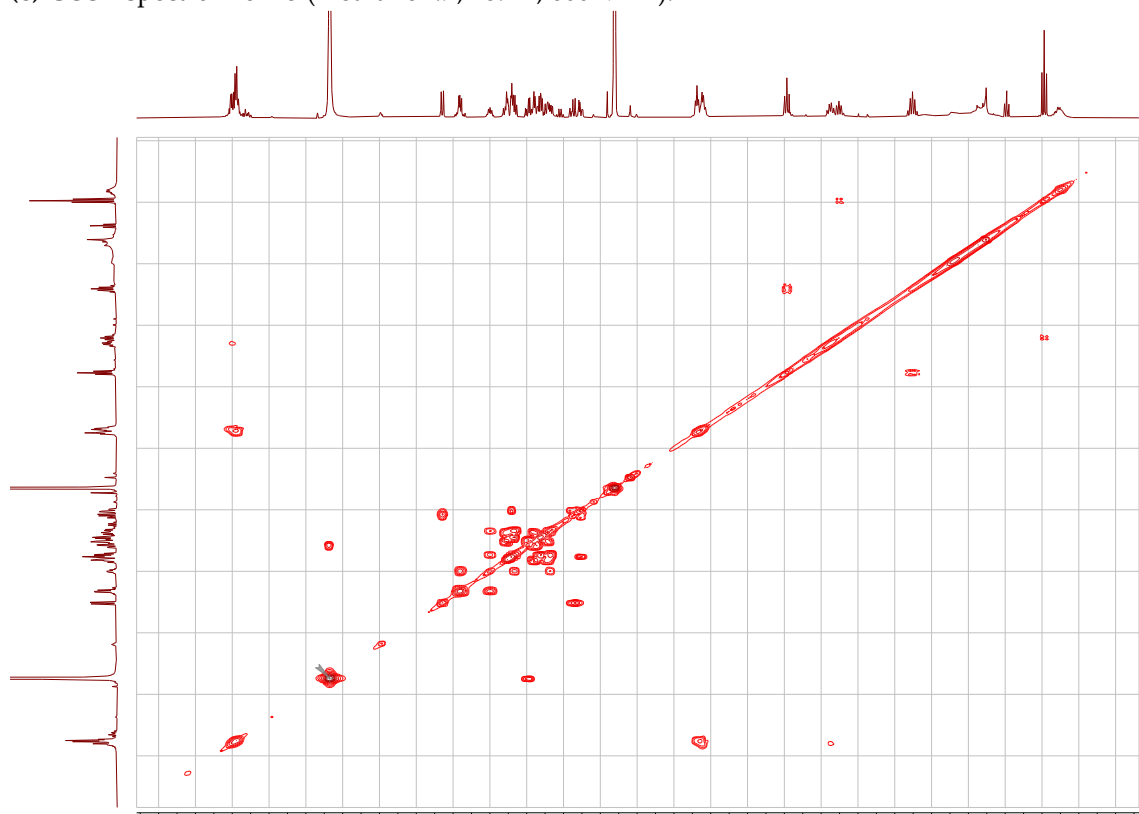

(f)  $^1\text{H}$ -NMR spectrum of **23** (acetone- $d_6$ , 289 K, 600 MHz).

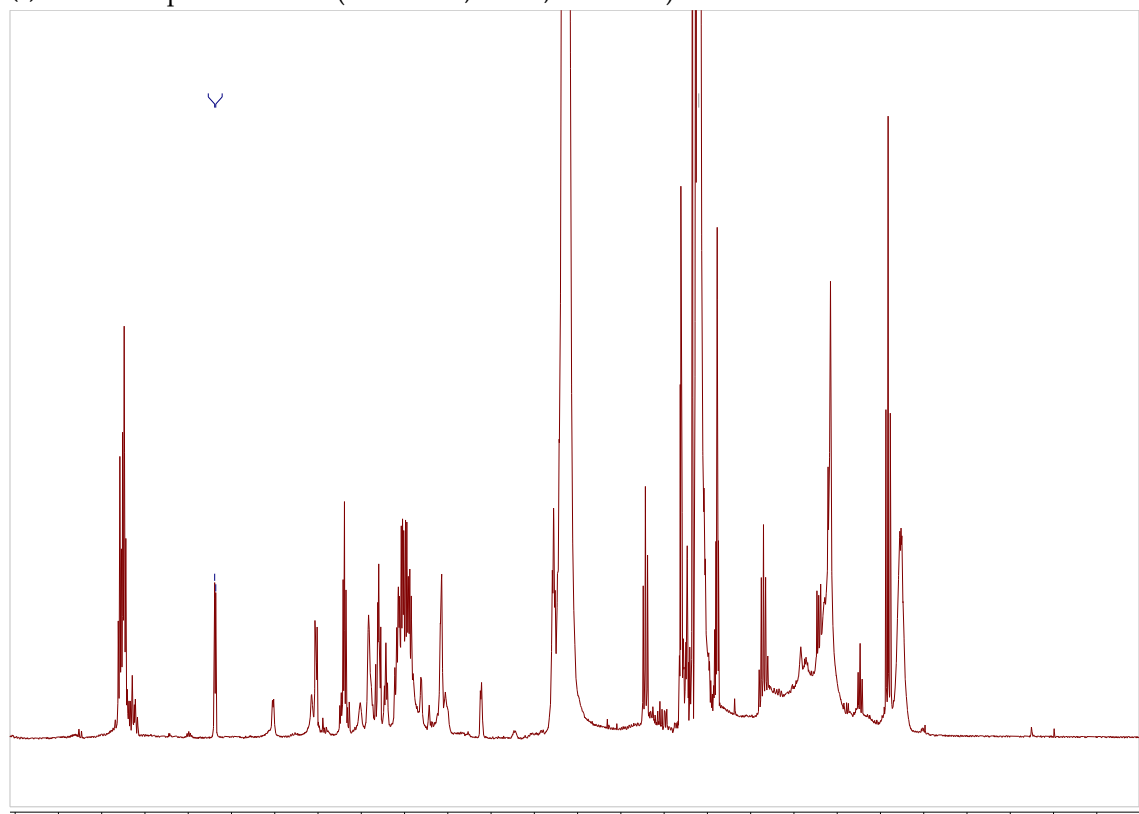

## HR-ESI-MS spectra of new compounds

**Figure S8.** HR-ESI-MS spectra of **7**.

**(a)** HR-(+)ESI-MS spectrum of **7** full view.

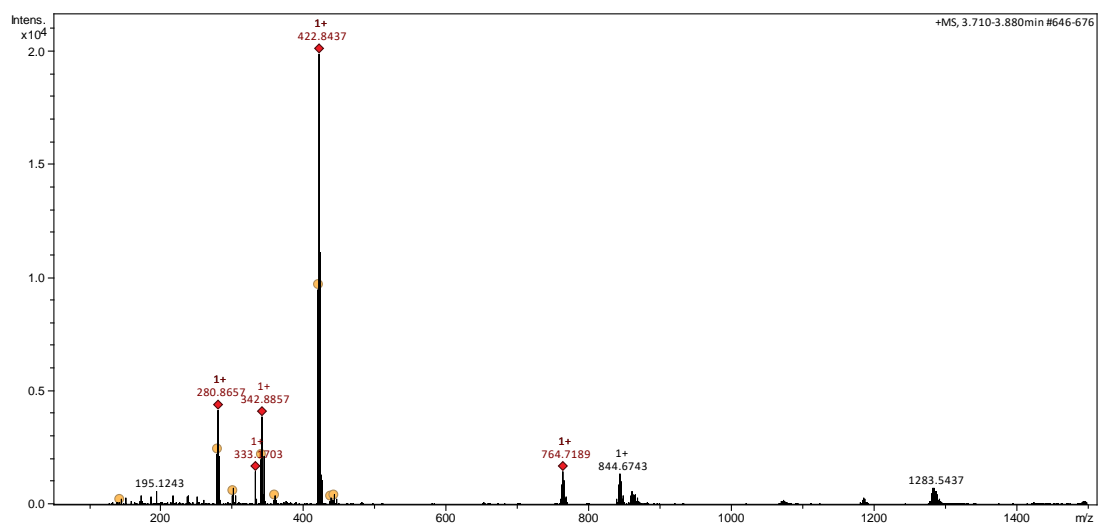

**(b)** HR-(+)ESI-MS spectrum of **7** zoomed in to show isotopic patterns and fragments.

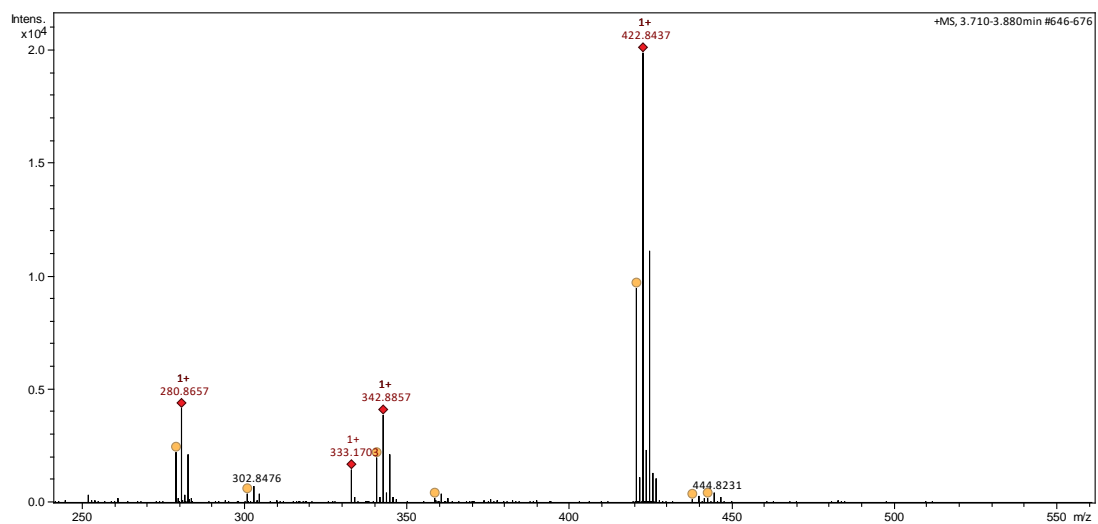

**(c)** HR-(-)ESI-MS spectrum of **7**.

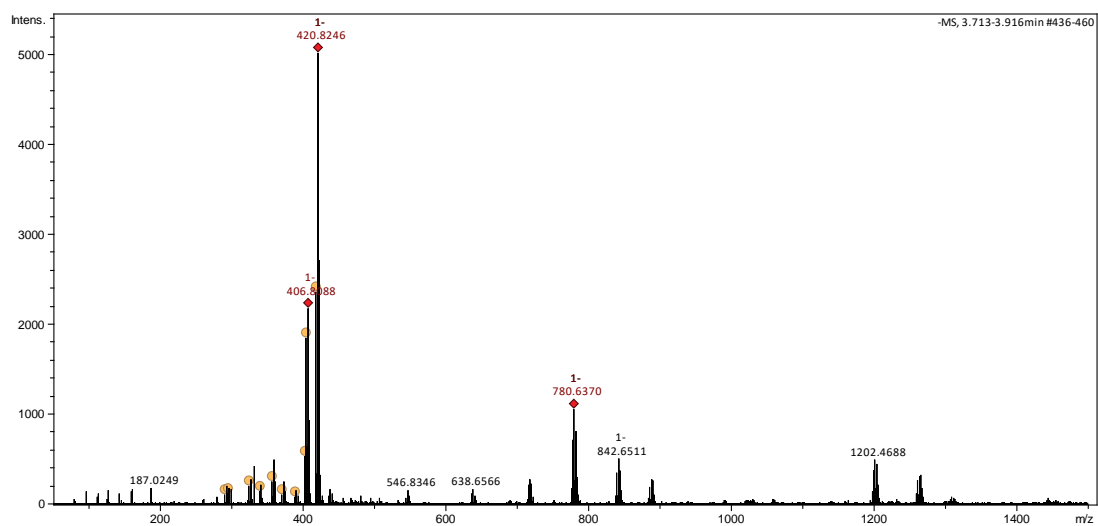

**Figure S9.** HR-(+)ESI-MS spectrum of **12**.

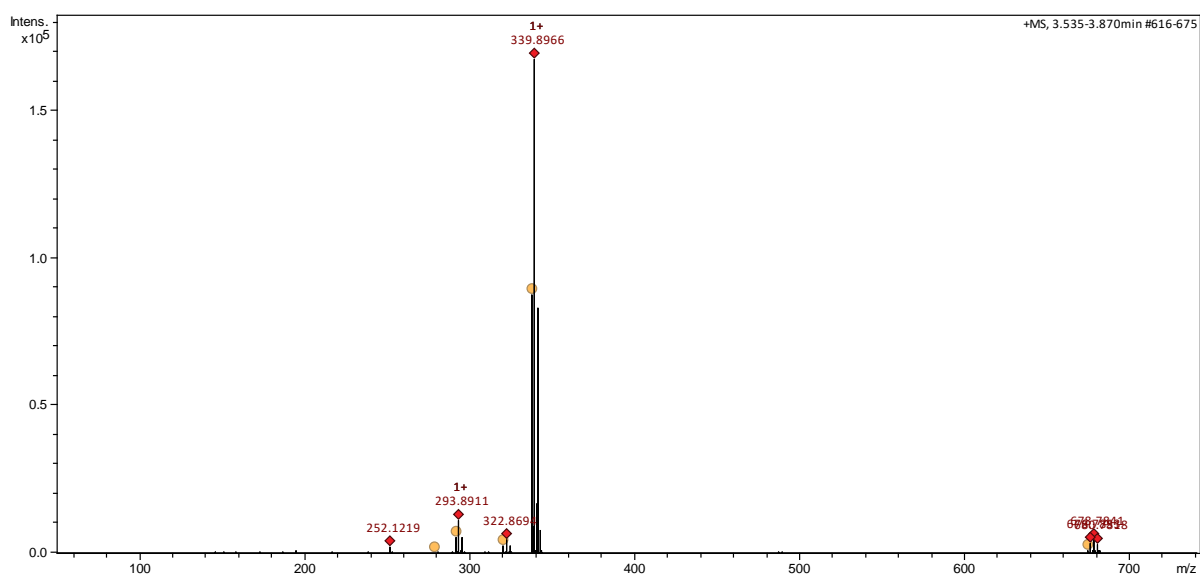

**Figure S10.** HR-(-)ESI-MS spectrum of **13**.

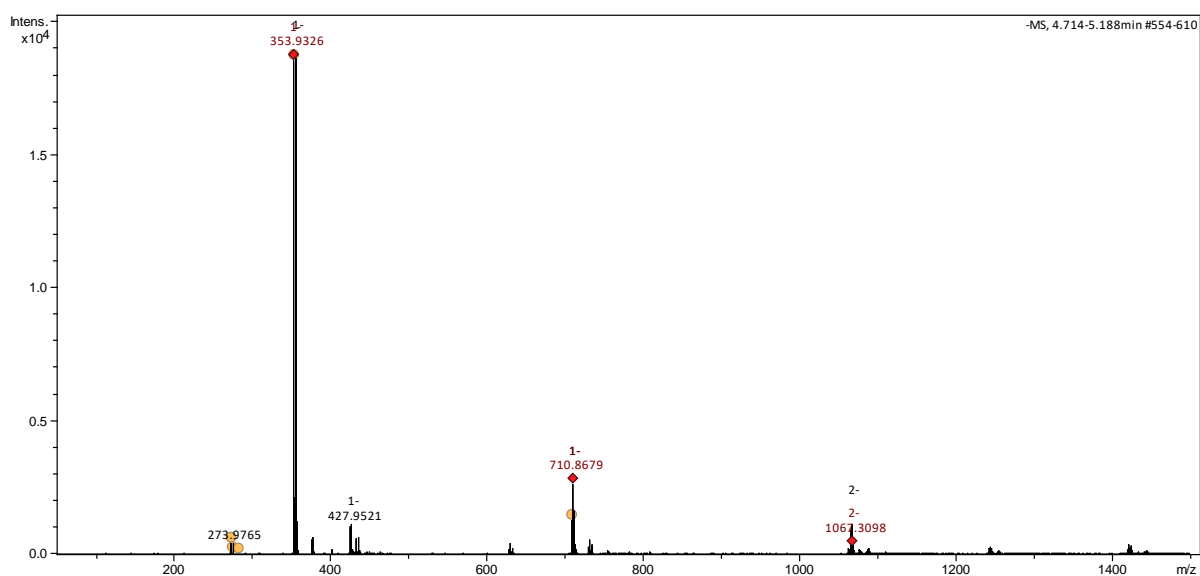

**Figure S11.** HR(-)ESI-MS spectrum of **14**.

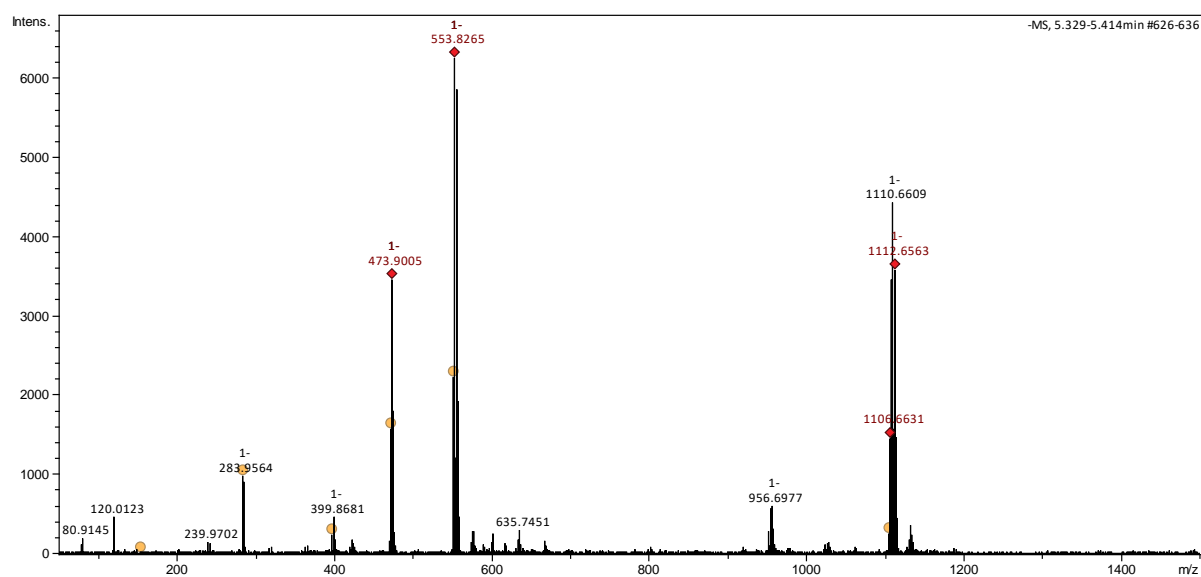

**Figure S12.** HR(-)ESI-MS spectrum of **15**.

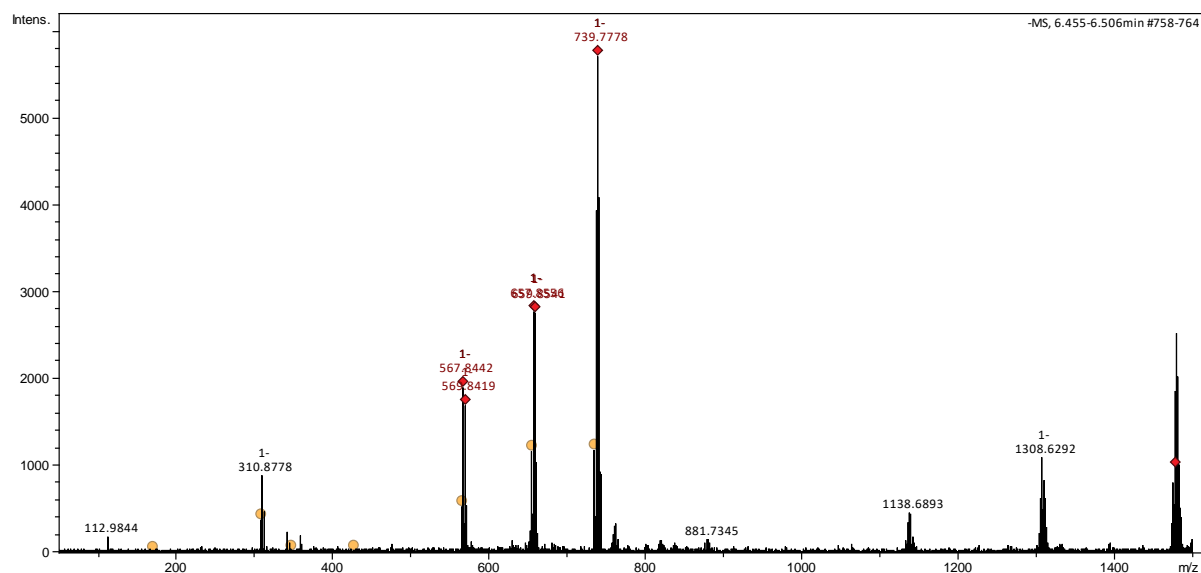

**Figure S13.** HR-(+)ESI-MS spectrum of **16**.

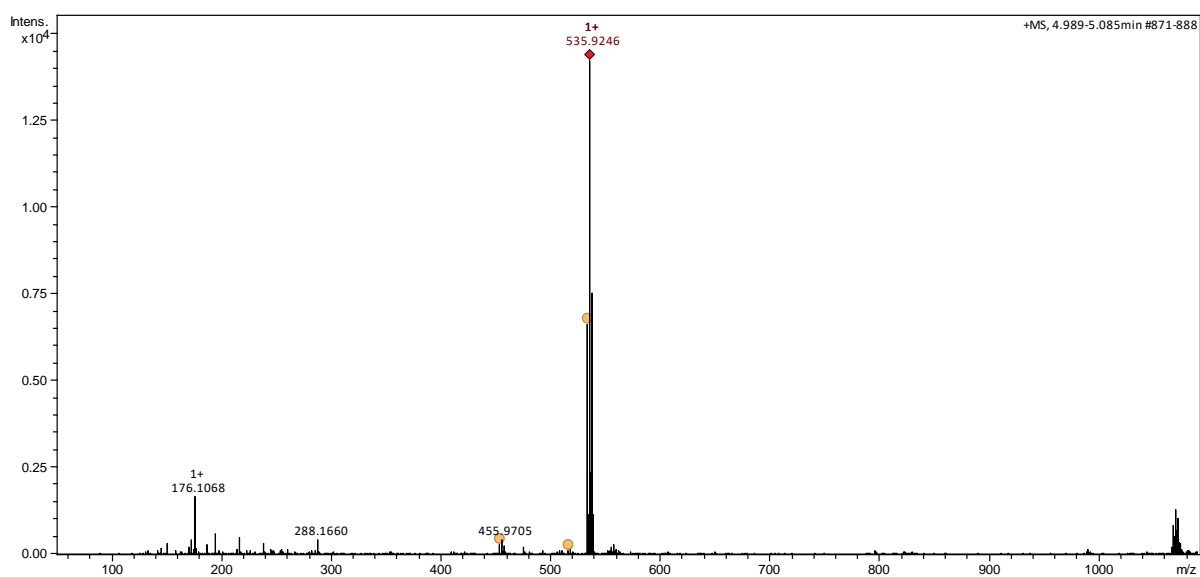

**Figure S14.** HR-(+)ESI-MS spectrum of **23**.

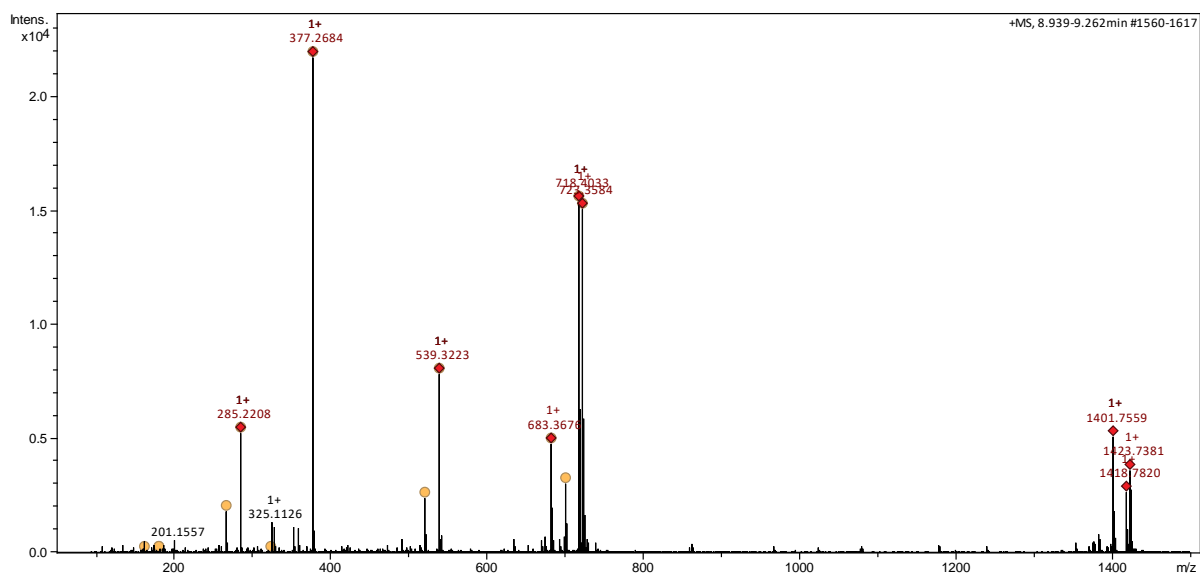

## $^1\text{H}$ -NMR spectra of previously reported compounds

**Figure S15.**  $^1\text{H}$ -NMR spectrum of **1** (methanol- $d_4$ , 289 K, 600 MHz).

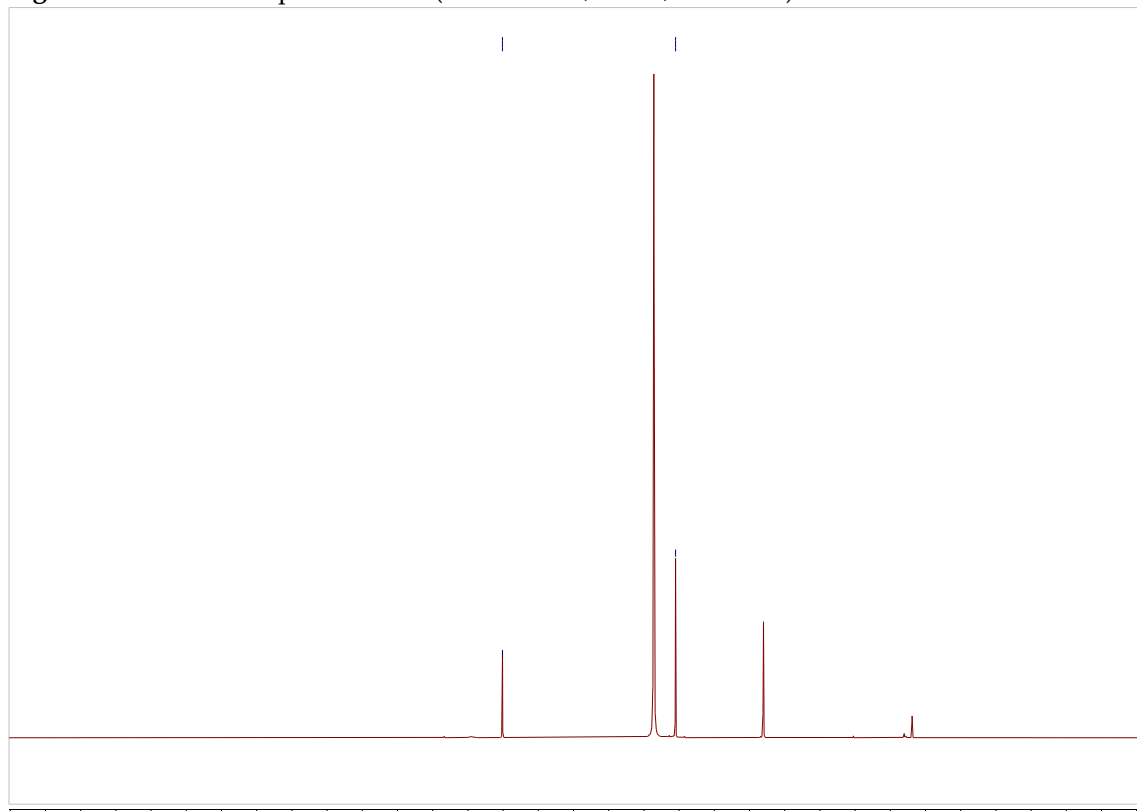

**Figure S16.**  $^1\text{H}$ -NMR spectrum of **2** (methanol- $d_4$ , 289 K, 600 MHz).

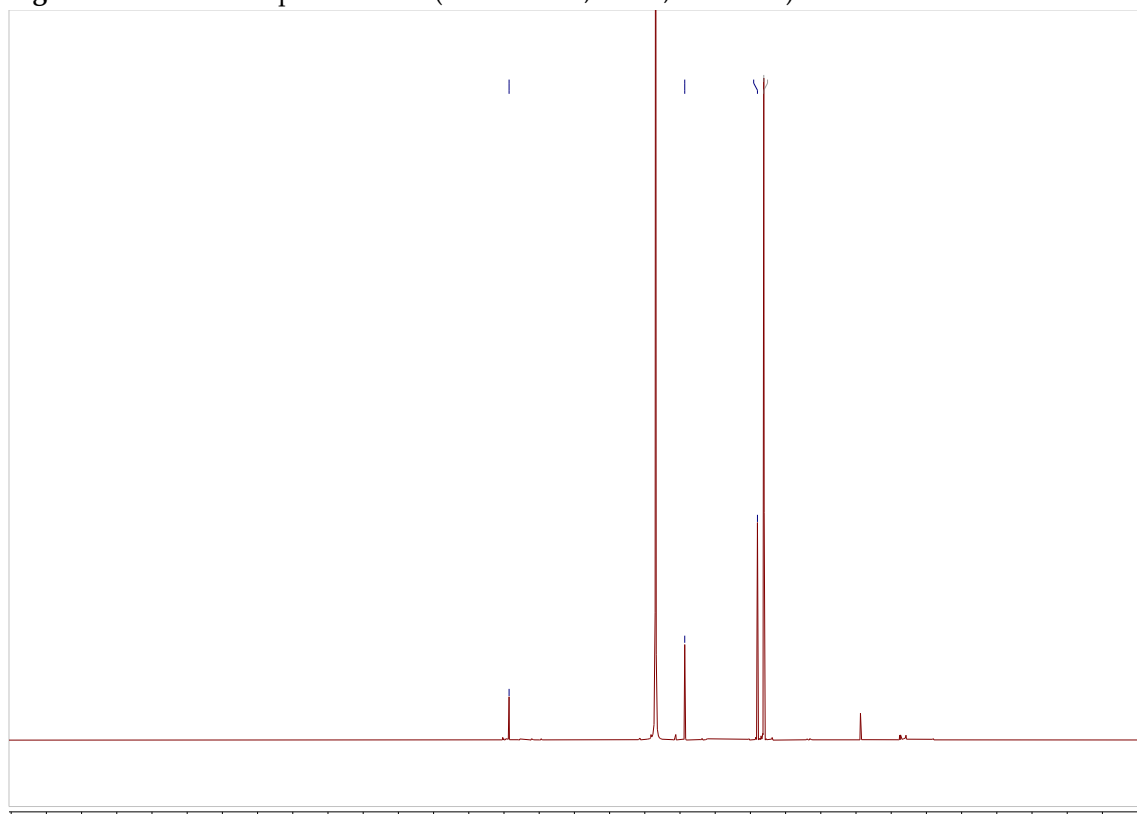

**Figure S17.**  $^1\text{H}$ -NMR spectrum of **3** (acetone- $d_6$ , 289 K, 600 MHz).

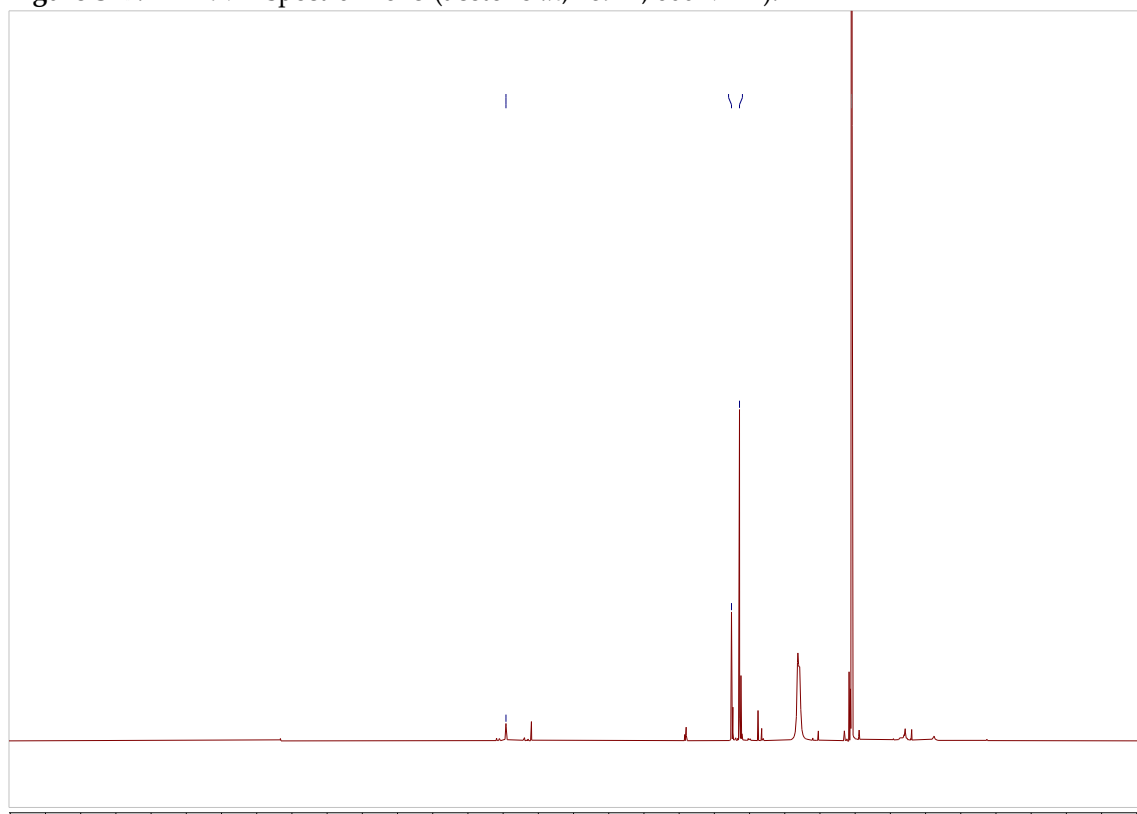

**Figure S18.**  $^1\text{H}$ -NMR spectrum of **4** (water- $d_2$ , 289 K, 400 MHz).

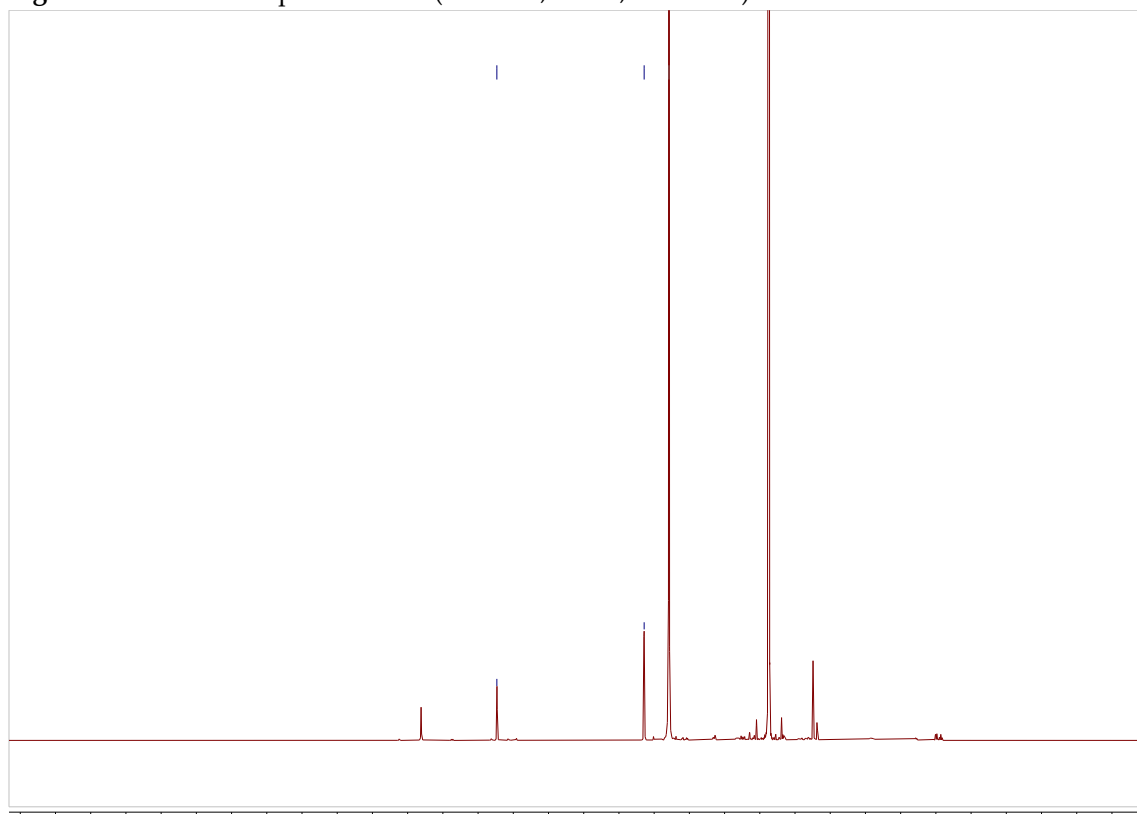

**Figure S19.**  $^1\text{H}$ -NMR spectrum of **5** (acetone- $d_6$ , 289 K, 600 MHz).

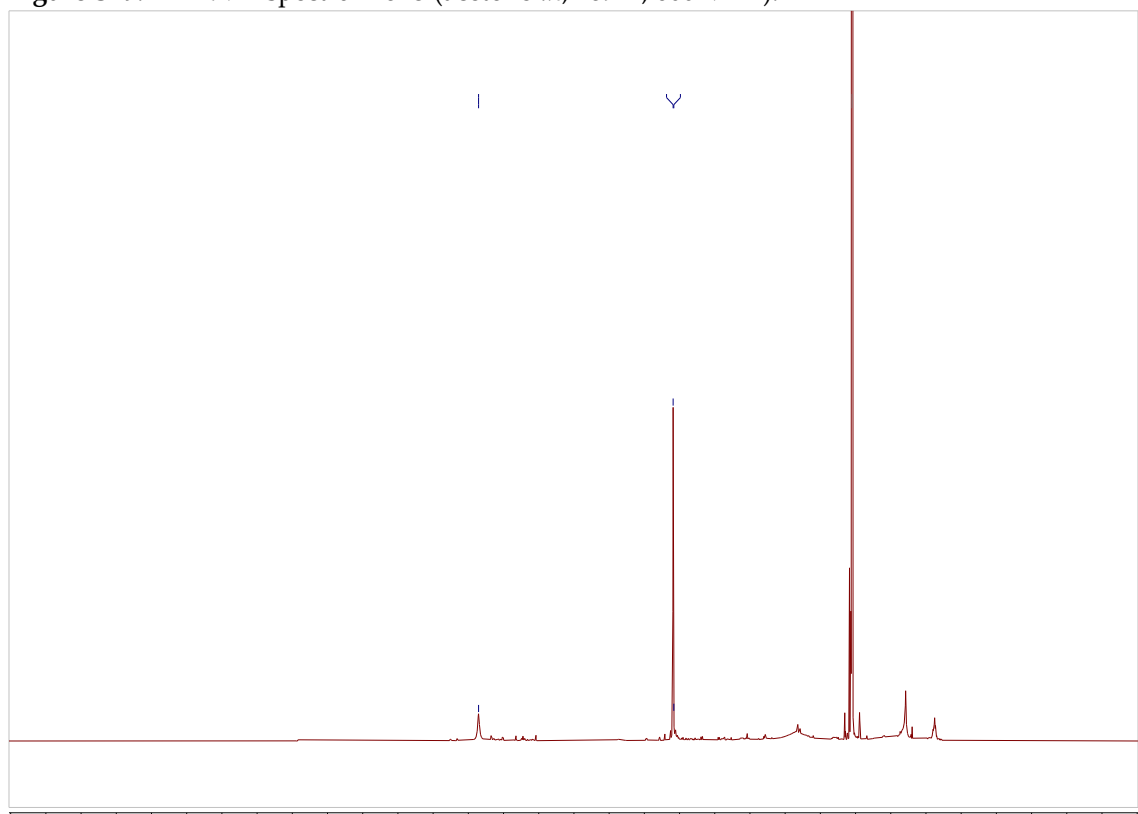

**Figure S20.**  $^1\text{H}$ -NMR spectrum of **6** (acetone- $d_6$ , 289 K, 600 MHz).

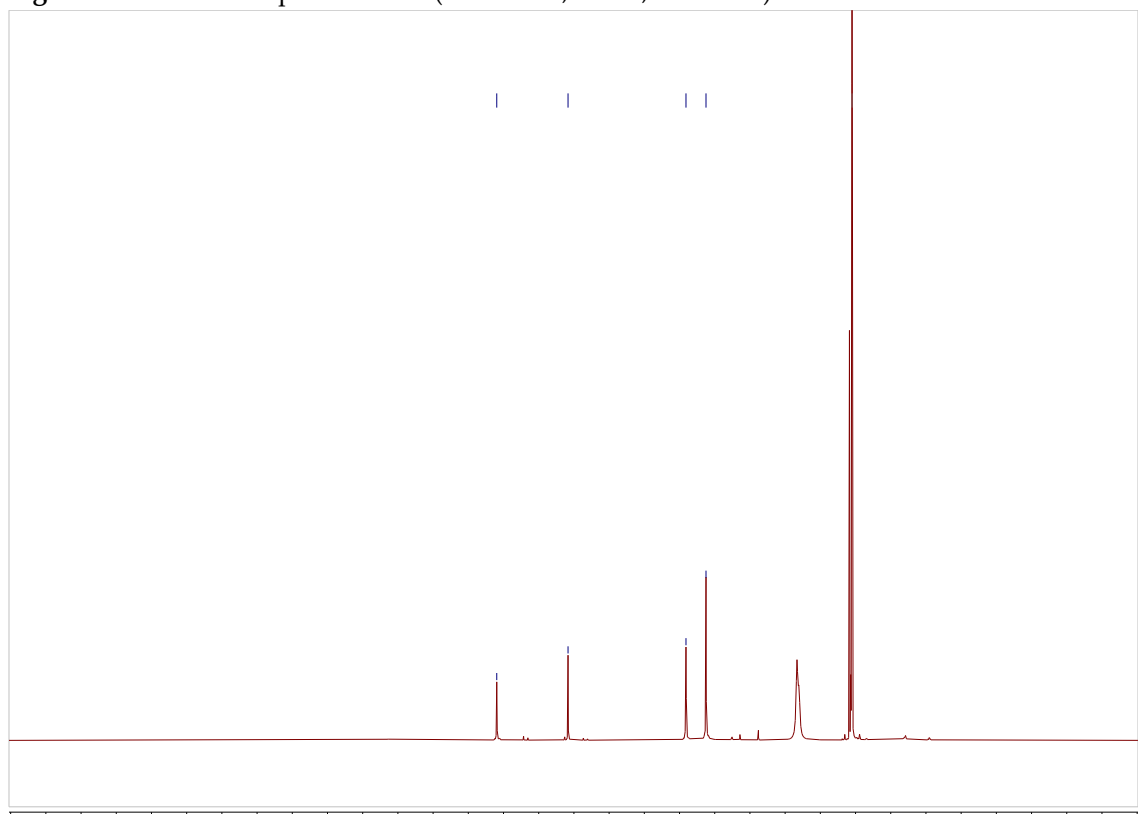

**Figure S21.**  $^1\text{H}$ -NMR spectrum of **8** (methanol- $d_4$ , 289 K, 600 MHz).

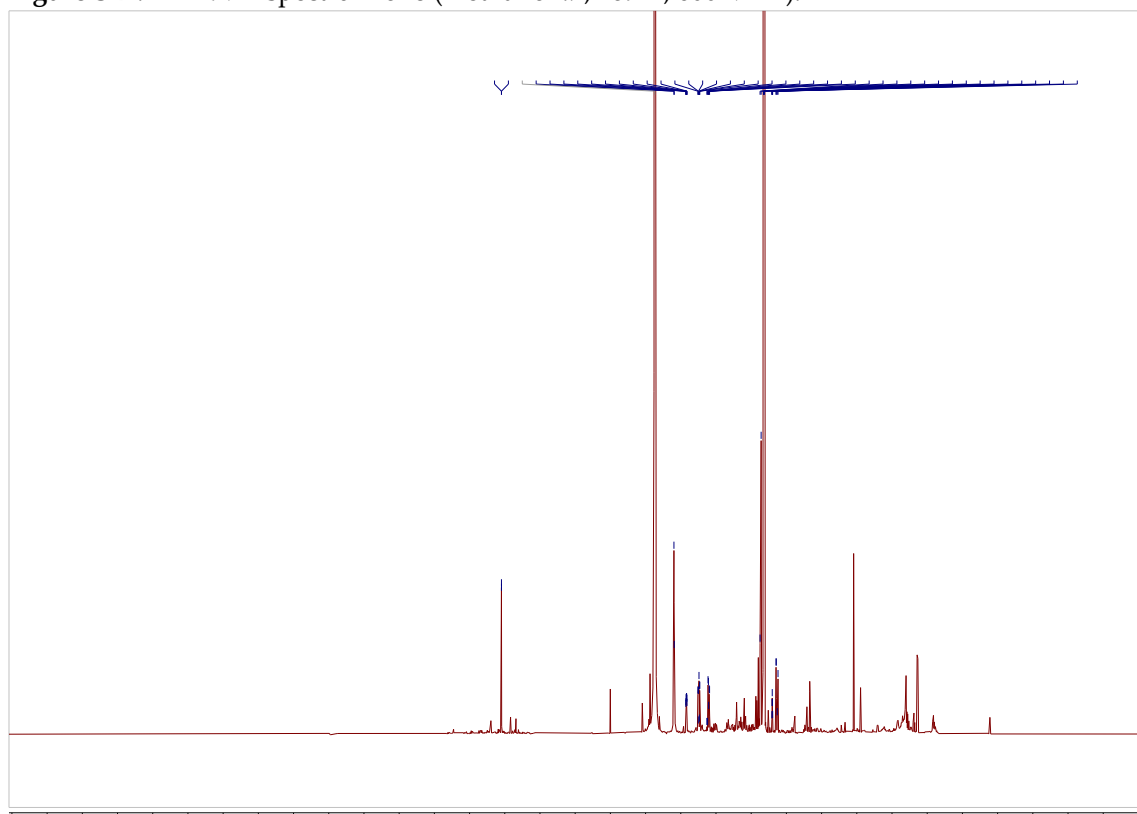

**Figure S22.**  $^1\text{H}$ -NMR spectrum of **9** (methanol- $d_4$ , 289 K, 600 MHz).

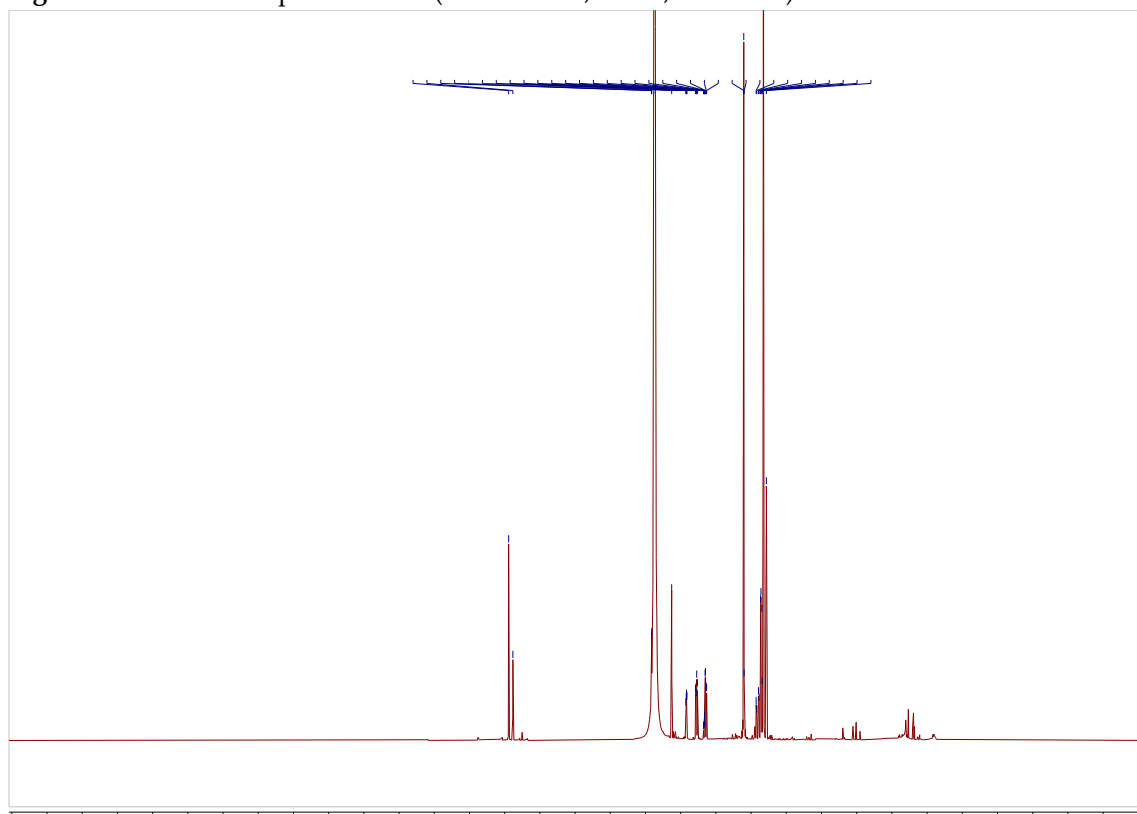

**Figure S23.**  $^1\text{H}$ -NMR spectrum of **10** (water- $d_2$ , 289 K, 600 MHz).

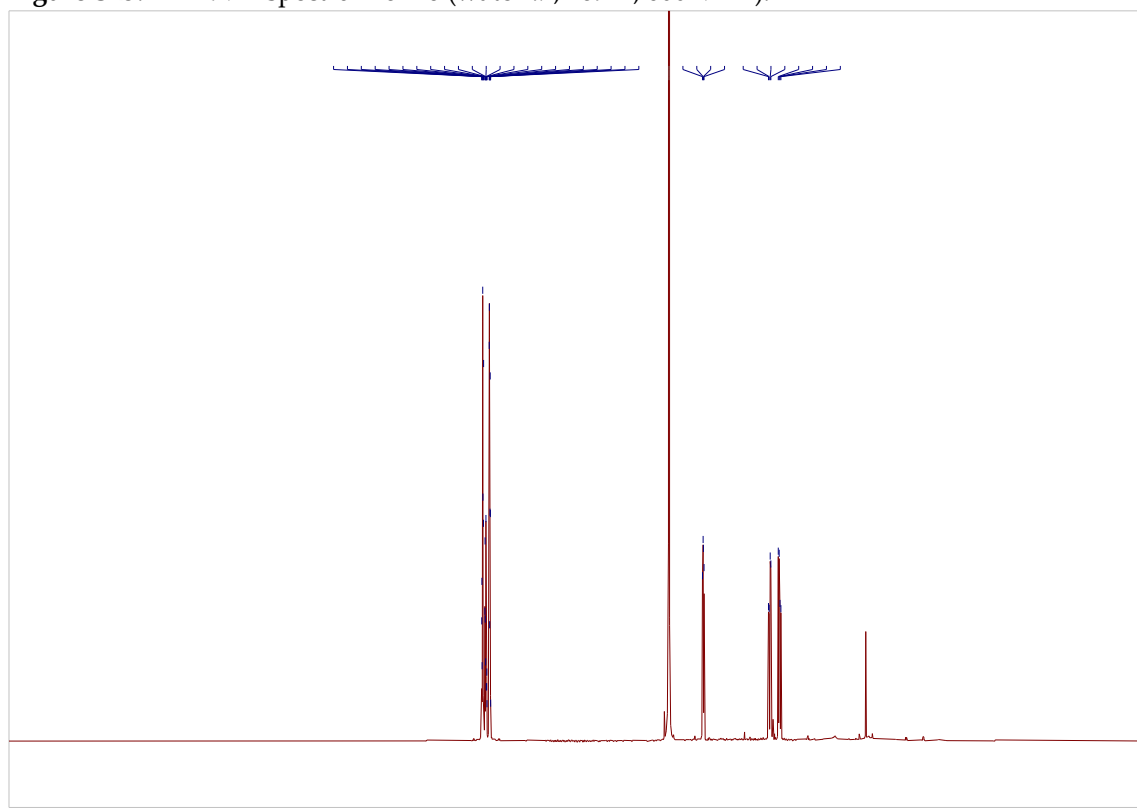

**Figure S24.**  $^1\text{H}$ -NMR spectrum of **11** (water- $d_2$ , 289 K, 600 MHz).

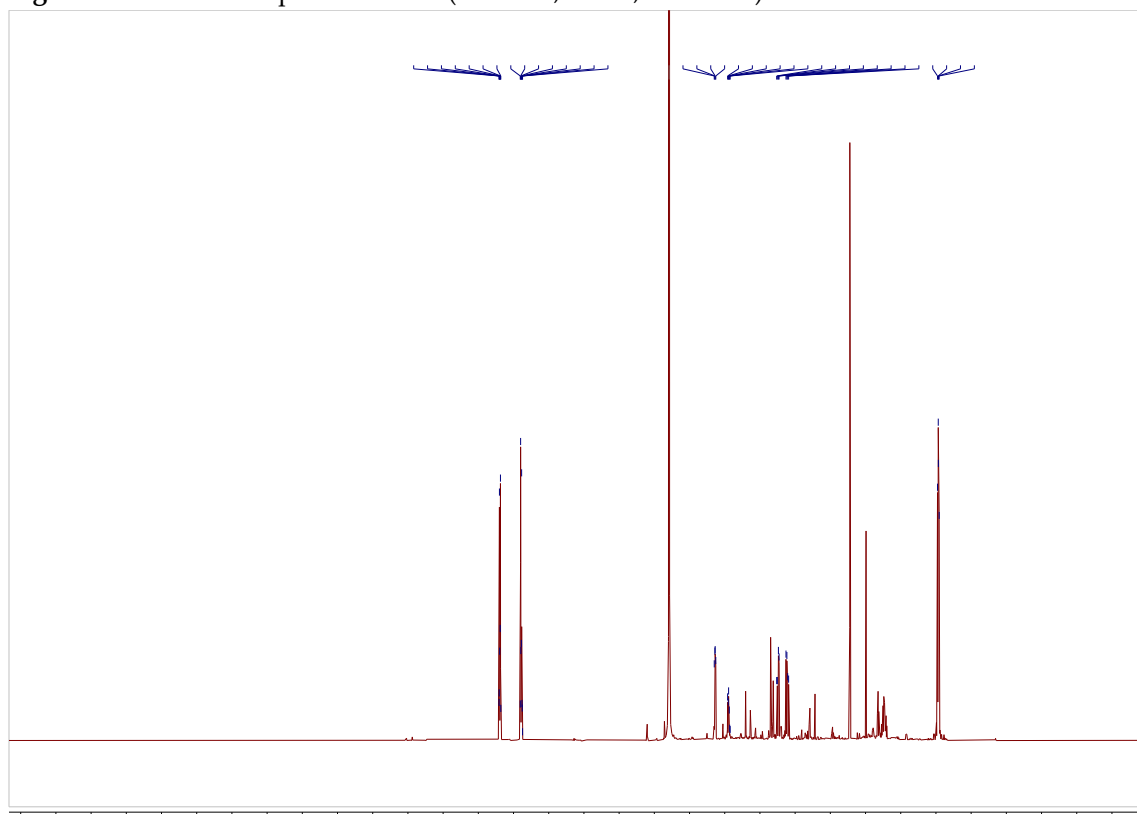

**Figure S25.**  $^1\text{H}$ -NMR spectrum of **17** (water- $d_2$ , 289 K, 600 MHz).

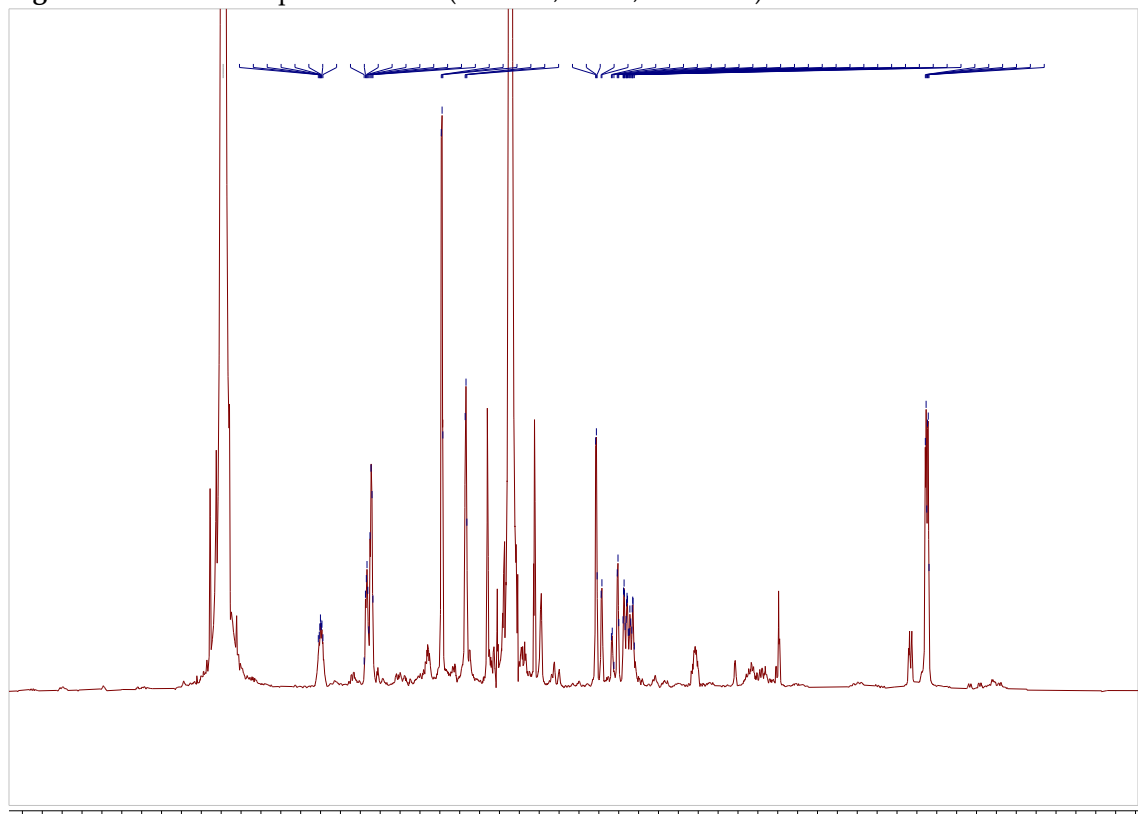

**Figure S26.**  $^1\text{H}$ -NMR spectrum of **18** (water- $d_2$ , 289 K, 600 MHz).

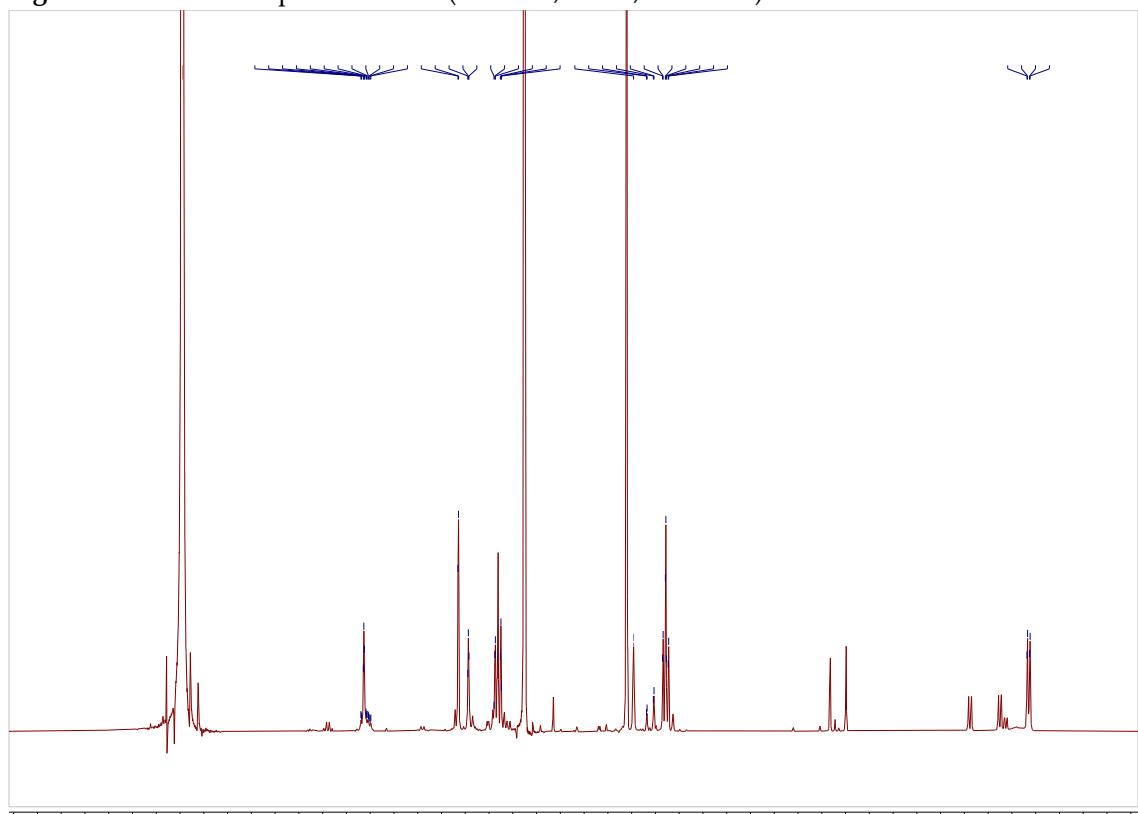

sma\_MAP7\_PROTON\_01

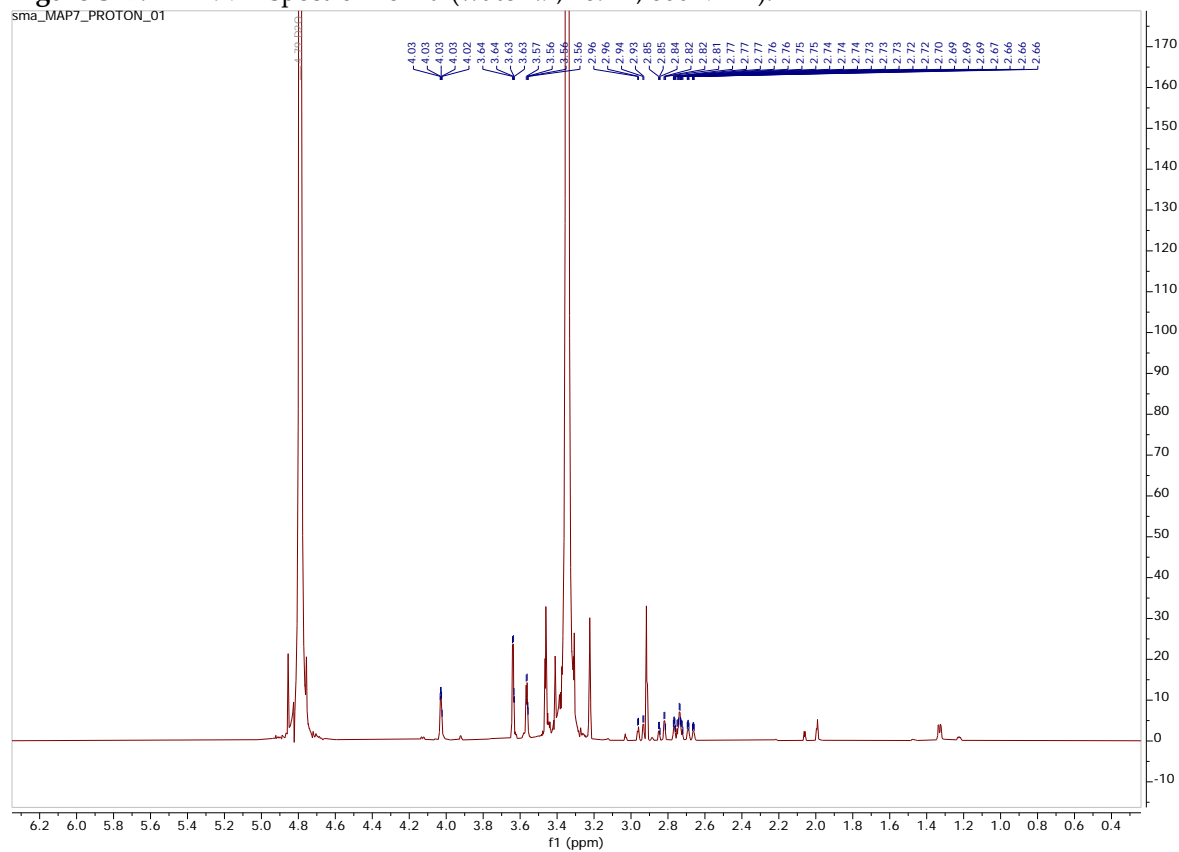

jac\_G2a6\_PROTON\_01

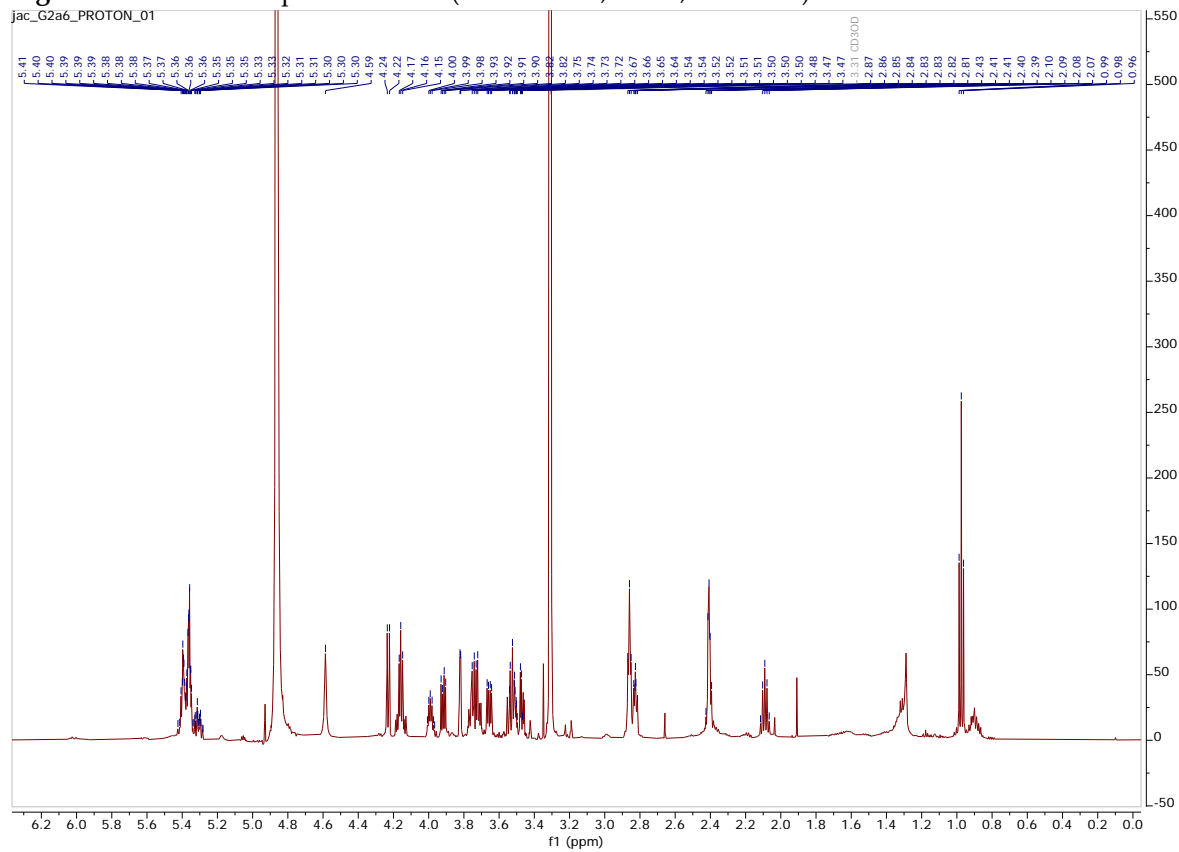

**Figure S29.**  $^1\text{H}$ -NMR spectrum of **21** (methanol- $d_4$ , 289 K, 600 MHz).

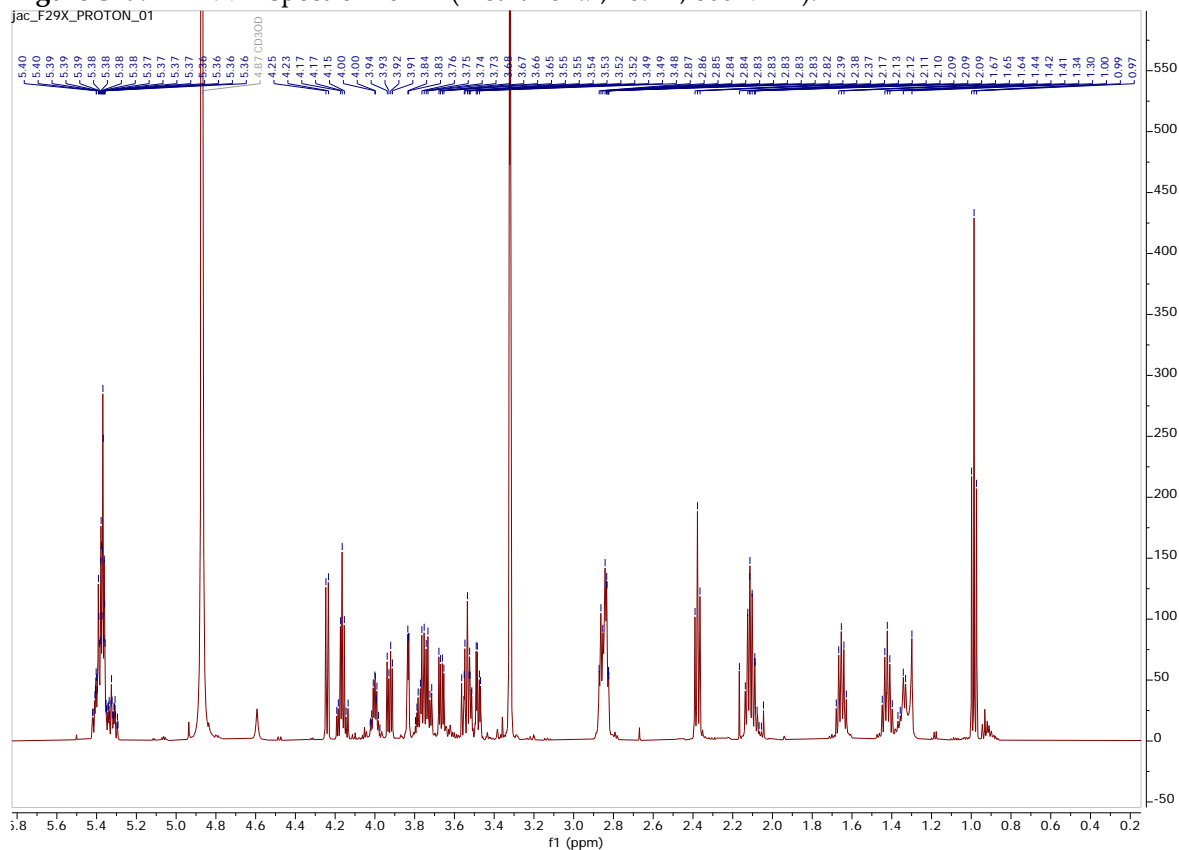

**Figure S30.**  $^1\text{H}$ -NMR spectrum of **22** (chloroform- $d_1$ , 289 K, 600 MHz).

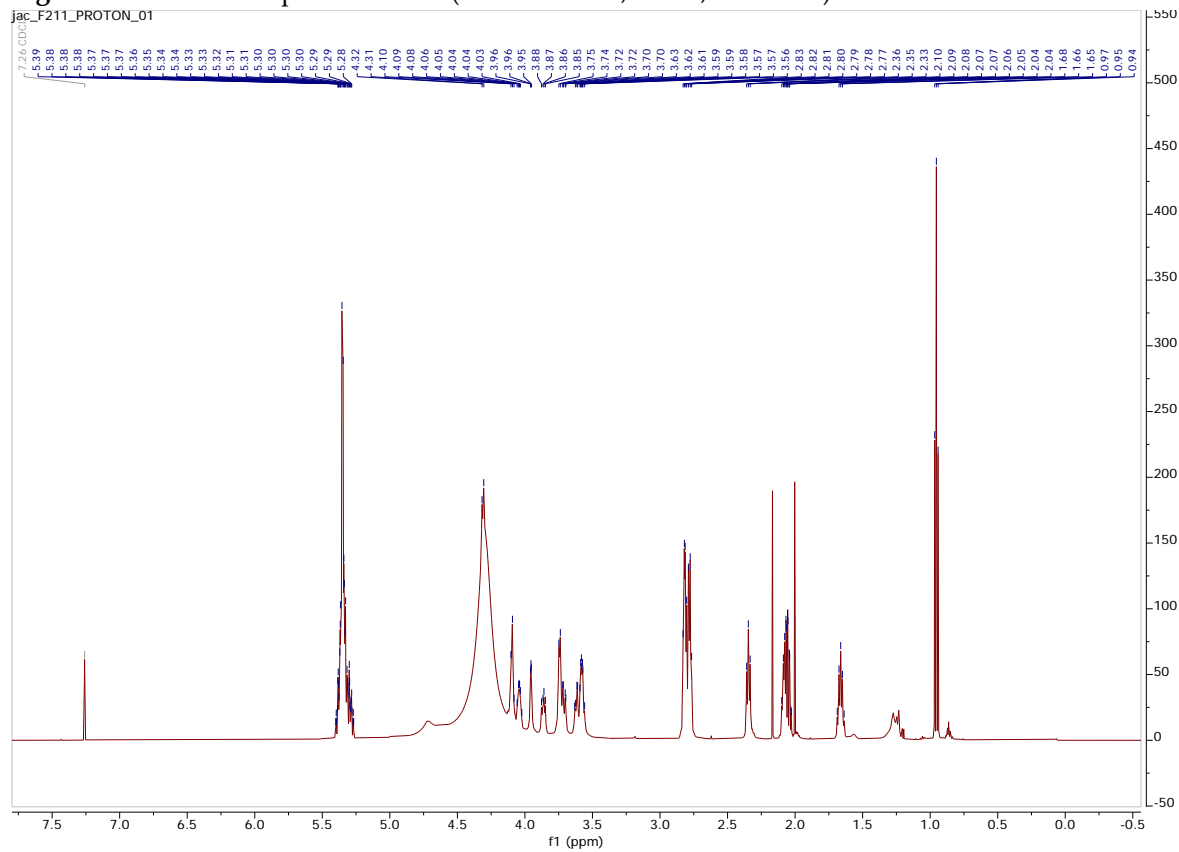

Supplement: s1 [file s1]
